# Supplementary material for: Physical activity and sport participation among adolescents: associations with mental health in different age groups. Results from the Young-HUNT study: a cross-sectional survey
Source: PubMed Central journal article supplement — BMJ Open. 2019 Sep 4;9(9):e028555. doi: 10.1136/bmjopen-2018-028555 (PMC6731817; doi:10.1136/bmjopen-2018-028555), 2019-09-04
Supplement: bmjopen-2018-028555.draft_revisions.pdf [file bmjopen-2018-028555.draft_revisions.pdf]

# BMJ Open

BMJ Open is committed to open peer review. As part of this commitment we make the peer review history of every article we publish publicly available.

When an article is published we post the peer reviewers' comments and the authors' responses online. We also post the versions of the paper that were used during peer review. These are the versions that the peer review comments apply to.

The versions of the paper that follow are the versions that were submitted during the peer review process. They are not the versions of record or the final published versions. They should not be cited or distributed as the published version of this manuscript.

BMJ Open is an open access journal and the full, final, typeset and author-corrected version of record of the manuscript is available on our site with no access controls, subscription charges or pay-per-view fees (<http://bmjopen.bmj.com>).

If you have any questions on BMJ Open's open peer review process please email [info.bmjopen@bmj.com](mailto:info.bmjopen@bmj.com)

# BMJ Open

## Physical activity and sport participation among adolescents: associations with mental health in different age groups. The Young-HUNT Study, Norway

|                               |                                                                                                                                                                                                                                                                                                                                                                                                                                                                                                                                                                                                                                                                                                                                                                                                                                                                       |
|-------------------------------|-----------------------------------------------------------------------------------------------------------------------------------------------------------------------------------------------------------------------------------------------------------------------------------------------------------------------------------------------------------------------------------------------------------------------------------------------------------------------------------------------------------------------------------------------------------------------------------------------------------------------------------------------------------------------------------------------------------------------------------------------------------------------------------------------------------------------------------------------------------------------|
| Journal:                      | <i>BMJ Open</i>                                                                                                                                                                                                                                                                                                                                                                                                                                                                                                                                                                                                                                                                                                                                                                                                                                                       |
| Manuscript ID                 | bmjopen-2018-028555                                                                                                                                                                                                                                                                                                                                                                                                                                                                                                                                                                                                                                                                                                                                                                                                                                                   |
| Article Type:                 | Research                                                                                                                                                                                                                                                                                                                                                                                                                                                                                                                                                                                                                                                                                                                                                                                                                                                              |
| Date Submitted by the Author: | 13-Dec-2018                                                                                                                                                                                                                                                                                                                                                                                                                                                                                                                                                                                                                                                                                                                                                                                                                                                           |
| Complete List of Authors:     | Guddal, Maren; Research and Communication Unit for Musculoskeletal Health (FORMI); Faculty of Medicine, University of Oslo<br>Stensland, Synne; Research and Communication Unit for Musculoskeletal Health (FORMI); Norwegian Centre for Violence and Traumatic Stress Studies, NKVTS<br>Småstuen, Milada; Research and Communication Unit for Musculoskeletal Health (FORMI); Faculty of Health Sciences, Oslo Metropolitan University<br>Bakke Johnsen, Marianne ; Research and Communication Unit for Musculoskeletal Health (FORMI); Faculty of Medicine, University of Oslo<br>Zwart, John-Anker; Research and Communication Unit for Musculoskeletal Health (FORMI); Faculty of Medicine, University of Oslo<br>Storheim, Kjersti; Research and Communication Unit for Musculoskeletal Health (FORMI); Faculty of Health Sciences, Oslo Metropolitan University |
| Keywords:                     | EPIDEMIOLOGY, PUBLIC HEALTH, SPORTS MEDICINE                                                                                                                                                                                                                                                                                                                                                                                                                                                                                                                                                                                                                                                                                                                                                                                                                          |
|                               |                                                                                                                                                                                                                                                                                                                                                                                                                                                                                                                                                                                                                                                                                                                                                                                                                                                                       |

SCHOLARONE™  
Manuscripts

1  
2  
3 **Physical activity and sport participation among adolescents: associations with**  
4 **mental health in different age groups. The Young-HUNT Study, Norway**  
5  
6  
7

8 Maren Hjelle Guddal, PT, MSc <sup>1,2\*</sup>

9 \* Corresponding author

10 Email: [m.h.guddal@studmed.uio.no](mailto:m.h.guddal@studmed.uio.no)

11 Phone number: +47 97663176

12 Postal Address:

13 FORMI, Oslo University Hospital, Ullevaal. Building 37 B

14 Post box 4956 Nydalen

15 NO-0424 Oslo

16 Norway  
17  
18  
19

20 Synne Øien Stensland, MD, PhD <sup>1,3</sup>

21 Email: [synne.stensland@nkvts.no](mailto:synne.stensland@nkvts.no)  
22

23 Milada Cvancarova Småstuen, PhD <sup>1,4</sup>

24 Email: [miladacv@medisin.uio.no](mailto:miladacv@medisin.uio.no)  
25

26 Marianne Bakke Johnsen, PT, PhD <sup>1,2</sup>

27 Email: [m.b.johnsen@medisin.uio.no](mailto:m.b.johnsen@medisin.uio.no)  
28  
29

30 John-Anker Zwart, MD, PhD <sup>1,2</sup>

31 Email: [j.a.zwart@medisin.uio.no](mailto:j.a.zwart@medisin.uio.no)  
32  
33

34 Kjersti Storheim, PT, PhD <sup>1,4</sup>

35 Email: [kjersti.storheim@medisin.uio.no](mailto:kjersti.storheim@medisin.uio.no)  
36

37 <sup>1</sup> Research and Communication Unit for Musculoskeletal Health (FORMI), Oslo University  
38 Hospital, Oslo, Norway

39 <sup>2</sup> Faculty of Medicine, University of Oslo, Norway

40 <sup>3</sup> Norwegian Centre for Violence and Traumatic Stress Studies, Oslo, Norway

41 <sup>4</sup> Faculty of Health Sciences, Oslo Metropolitan University, Oslo, Norway  
42  
43  
44  
45  
46  
47  
48  
49

50 **Word count: 3352**  
51  
52  
53  
54  
55  
56  
57  
58  
59  
60

## Abstract

**Objective:** Knowledge of how physical activity (PA) and sport participation are related to mental health throughout adolescence is scarce. Our objective was to describe PA levels and sport participation in a population-based sample of adolescents, and to explore how they relate to mental health in different age groups.

**Design:** A population-based cross-sectional study.

**Setting and participants:** The adolescent part of the Nord-Trøndelag Health Study (Young-HUNT3) which is a Norwegian population-based health survey conducted from 2006–2008. Of 10464 invited participants (age 13-19 years), 7619 (73%) participated, of whom 3785 (50%) were boys.

**Outcome measures:** Mental health outcomes included psychological distress assessed using a short version of the Hopkins Symptom Check List (SCL-5), self-esteem assessed using a short version of The Rosenberg Self-Esteem Scale (RSE) and general well-being measured with a question about life satisfaction.

**Method:** Logistic regression models were used to estimate the likelihood of mental health problems (psychological distress, low self-esteem, low life satisfaction), according to PA level and type of sport participation, stratified by gender and school level (junior vs senior high school).

**Results:** Fewer senior high school students participated in team sports compared to junior high school students ( $p < 0.001$ ). Physically active adolescents had higher self-esteem and life satisfaction. A high PA level, compared to a low PA level, was associated with reduced odds of psychological distress among senior high school students (Odds ratio [OR] = 0.63, 95% confidence interval [CI] [0.46-0.86] for girls and OR = 0.46, 95% CI [0.27-0.79] for boys). Team sport participation was related to better mental health status.

1  
2  
3 **Conclusion:** A high PA level was favorably associated with various dimensions of mental  
4 health, especially for adolescents in senior high school. Team sport participation may have a  
5 positive impact on mental health and should therefore be encouraged.  
6  
7  
8  
9

## 10 11 12 **Article summary**

### 13 14 15 **Strengths and limitations of this study**

- 16  
17 • Large population-based sample of adolescents with a high participation rate.
- 18  
19 • Comprehensive information about sport participation and validated measures of  
20  
21 mental health across adolescent age groups.
- 22  
23 • Stratified analysis that takes potential age and gender differences during adolescence  
24  
25 into account, and adjustments of possible confounders including exposures to  
26  
27 interpersonal violence (physical violence, bullying, sexual abuse).
- 28  
29 • The main limitation of this study is the cross-sectional study design.
- 30  
31 • Measures of PA were self-reported.
- 32  
33  
34  
35  
36  
37  
38  
39  
40  
41  
42  
43  
44  
45  
46  
47  
48  
49  
50  
51  
52  
53  
54  
55  
56  
57  
58  
59  
60

## Introduction

Physical activity and psychological well-being are essential to healthy development and quality of life in adolescence<sup>1-3</sup>. Health behaviours, including the habit of engaging in regular physical activity, are often established during this period<sup>4,5</sup>, paving the way for long-term health prospects.

Maintenance of PA throughout adolescence is of major importance in a public health perspective. Engaging in PA and sports during adolescence has a positive influence on the development of lifelong PA<sup>6-8</sup> and psychological well-being<sup>1,9</sup>. Yet adolescents tend to be less physically active with increasing age<sup>10</sup>. The most dramatic decrease in PA is found to occur between the ages of 15 and 16, around the transition from junior to senior high school<sup>11</sup>. Although few adolescents are satisfying the recommended 60 minutes of PA per day worldwide<sup>12,13</sup>, sport participation is found to be high in some population-based studies<sup>6,14</sup>. However, information about participation rates in various type of sports throughout adolescence is lacking.

Mental health problems are another major challenge among adolescents; currently the leading cause of health-related disability within this age group, affecting up to 20% of adolescents worldwide<sup>15,16</sup>. Prevalence rates of mental health problems increase with age, especially from the mid-teens (14-16 years)<sup>11,17</sup>. Poor mental health also tends to carry over into adulthood<sup>17,18</sup>, highlighting the importance of preventive efforts during adolescence. Currently the evidence indicates that PA may have a positive impact on psychosocial outcomes among adolescents, although our knowledge is limited<sup>1</sup>. Studies commonly assess these relationships without attending to different developmental stages during adolescence. Further, the need for measures of PA which account for various types of sports/activities has been emphasized<sup>1</sup>. No large population-based studies have evaluated PA levels and type of sport participation in relation to mental health among girls and boys in different adolescent

1  
2  
3 age groups. Identification of these relationships could have implications for preventive  
4  
5 programs and may contribute to more accurate strategies for increasing engagement in PA and  
6  
7 improving mental health among adolescents.  
8  
9

10 The aim of this study was to describe PA levels and the frequency of sport  
11  
12 participation in a large population-based sample of adolescents in relation to age and gender,  
13  
14 and to explore the associations between PA level, type of sport participation, and mental  
15  
16 health, including psychological distress, self-esteem, and life satisfaction.  
17  
18  
19  
20  
21  
22

## 23 **Methods**

### 24 *Study sample*

25  
26 From 2006-2008 all adolescent residents (age 13-19 years) of the Nord-Trøndelag county in  
27  
28 Norway (N=10464) were invited to participate in the third wave of the population-based  
29  
30 Nord-Trøndelag Health Study (Young-HUNT3). The attendees completed a comprehensive  
31  
32 health-related questionnaire during school hours. Of those invited, 7716 (74%) adolescents  
33  
34 responded to the questionnaire and attended a clinical examination. The response rate was  
35  
36 82% among junior high school students and 69% among senior high school students.  
37  
38  
39

40 Participants not enrolled in school (N=84) and participants  $\geq 20$  years of age (N=13) were  
41  
42 excluded from the analyses in this study. Thus, the study population comprised 7619  
43  
44 participants (73%) (Appendix), of whom 4615 (61%) went to junior high school. All  
45  
46 participants in senior high school were  $\geq 16$  years old.  
47  
48  
49  
50  
51  
52

### 53 *Exposure variables*

54  
55 Leisure time PA level was assessed by a validated question on frequency of PA from the  
56  
57 World Health Organization Health Behavior in Schoolchildren (WHO HBSC) Survey  
58  
59  
60

1  
2  
3 Questionnaire <sup>19</sup>: Not during the average school day: “How many days a week do you play  
4 sports or exercise to the point where you breathe heavily and/or sweat?”. Response  
5 alternatives were: every day, 4-6 d/week, 2-3 d/week, 1 d/week, less than every week, less  
6 than every month, and never. Responses were categorized into three levels of PA: “Low PA”  
7 ( $\leq 1$  d/week) (reference group), “moderate PA” (2-3 d/week), and “high PA” ( $\geq 4$  d/week).  
8  
9  
10  
11  
12  
13

14 Type and frequency of sport participation was assessed by the question: “How often  
15 have you participated in the following activities/sports in the last 12 months?”; endurance  
16 sports (e.g. cross-country skiing, swimming, running), team sports (e.g. soccer, volleyball,  
17 handball), strength sports (e.g. weightlifting, bodybuilding), technical sports (e.g. track and  
18 field, alpine skiing, snowboard), aesthetic sports (e.g. dance, gymnastics), martial arts (e.g.  
19 judo, karate, boxing), extreme sports (e.g. rafting, rock climbing, paragliding),  
20 jogging/walking, and other (Table 2). Jogging/walking was not defined as a sport, and  
21 responses to this variable were excluded. Four alternatives were given for describing the  
22 frequency of participation in each of the sport categories: 0,  $<1$ ,  $\geq 1$  time per week. A  
23 frequency of “ $\geq 1$  time per week” was defined as active participation. Furthermore,  
24 adolescents were classified by their participation in sports into team sports (e.g. soccer,  
25 volleyball, handball) or individual sports (all other sports). The reference group consisted of  
26 those with no or infrequent participation ( $<1$  time/week) in all the sport categories, as well as  
27 those who reported a low level of PA ( $\leq 1$  day/week). The groups were mutually exclusive.  
28  
29  
30  
31  
32  
33  
34  
35  
36  
37  
38  
39  
40  
41  
42  
43  
44  
45  
46  
47  
48

#### 49 *Outcome variables - Mental health*

50  
51 Psychological distress was assessed using a short version of the Hopkins Symptom Check  
52 List (SCL-5) <sup>20</sup>, including the phrases: “During the last 14 days: I have been constantly afraid  
53 and anxious; I have felt tense or uneasy; I have felt hopeless about the future; I have felt  
54 dejected or sad; I have worried too much about various things”. Responses were scored  
55  
56  
57  
58  
59  
60



1  
2  
3 according to four response alternatives ranging from “not at all bothered” (1) to “extremely  
4 bothered” (4). A mean score was calculated, and a cut-off for symptoms of anxiety and  
5 depression was set at a mean score above two <sup>20</sup>.  
6  
7

8  
9  
10 Self-esteem/feelings of self-worth was measured using a short version of The  
11 Rosenberg Self-Esteem Scale (RSE) (original 10 items) <sup>21</sup>, including four statements: “I have  
12 a positive attitude toward myself”, “I feel rather useless at times”, “I feel that I don’t have  
13 much to be proud of”, and “I feel that I am a valuable person, at least equal to other people”.  
14 Response alternatives were measured on a 4-point scale ranging from “I strongly agree” (1)  
15 to “I strongly disagree” (4). For the first and last items the scores were inversed. A mean  
16 score was calculated (range 4-16), with higher scores indicating higher levels of self-esteem.  
17 A cut-off was set at a mean score of 10 (midpoint of the scale) to separate low and high self-  
18 esteem, corresponding to the recommended cut-off at 25 on the original 10-item RSE scale  
19 (range 10-40) <sup>22</sup>.  
20  
21  
22  
23  
24  
25  
26  
27  
28  
29  
30  
31  
32

33 General well-being was measured with a question about life satisfaction: “Thinking  
34 about your life at the moment, would you say that you by and large are satisfied with life, or  
35 are you mostly dissatisfied?” Response alternatives were measured on a 7-point scale ranging  
36 from “very satisfied” (1) to “very dissatisfied” (7), and were coded into a dichotomous  
37 outcome variable where adolescents who responded 1-3 were classified as “high life  
38 satisfaction”, and those who responded 4-7 were classified as “low life satisfaction”.  
39  
40  
41  
42  
43  
44  
45  
46  
47  
48

#### 49 *Potential confounders*

50  
51 Data on gender and age were obtained from the Norwegian National Population Registry.  
52 Socioeconomic status was based on participants’ reports of perceived family economy.  
53 Pubertal development was assessed by self-reported pubertal status using the validated  
54 Pubertal Development Scale (PDS) <sup>23</sup>. Participants were asked to rate their own growth and to  
55  
56  
57  
58  
59  
60

1  
2  
3 assess pubic hair growth. Further, boys were asked to assess changes in voice and facial hair  
4  
5 growth, while girls were asked about age at menarche and breast development. Pubertal  
6  
7 changes were reported on scales ranging from 1 (has not begun) to 4 (development  
8  
9 completed). Menarche was dichotomized into yes (coded 4) and no (coded 1). The items were  
10  
11 summed up and an average PDS score was calculated.  
12  
13

14 Exposure to interpersonal violence was assessed by asking: “Have you ever  
15  
16 experienced any of these events?” (no or yes): 1) Been subjected to violence (beaten or  
17  
18 injured), 2) Been subjected to unpleasant/disagreeable sexual acts by someone approximately  
19  
20 your own age, 3) Been subjected to unpleasant/disagreeable sexual acts by an adult, and 4)  
21  
22 Been threatened or physically harassed by fellow students at school over a period of time.  
23  
24 Responses were categorized as “prior violence”, “prior sexual abuse” (by peer or adult), and  
25  
26 “prior bullying”<sup>24</sup>.  
27  
28  
29  
30  
31  
32

### 33 *Statistical analyses*

34  
35 Categorical variables were described with counts and percentages, and continuous variables  
36  
37 with mean and standard deviation (SD). Possible associations between gender and age  
38  
39 distribution were assessed with Chi-square tests.  
40  
41

42 The associations between 1) PA level and 2) type of sport participation and the mental  
43  
44 health outcomes were evaluated using multiple logistic regression models. The results are  
45  
46 expressed as odds ratios (OR) with 95% confidence intervals (CI). Analyses were stratified by  
47  
48 gender and school level (junior and senior high school). To adjust for potential confounding,  
49  
50 age, puberty development (PDS), socio-economic status, prior violence, sexual abuse (by peer  
51  
52 or adult), and bullying were all included in the multiple models. All tests were two-sided, and  
53  
54 the significance level was set to 5%. Analyses were performed using SPSS version 21 (SPSS  
55  
56 Inc., Chicago, IL).  
57  
58  
59  
60

1  
2  
3 Due to missing data on pubertal development (PDS score) (13% in girls, 15% in boys),  
4  
5 a model-based imputation for this variable was performed. Linear regression models stratified  
6  
7 by gender were fitted with age and body mass index (BMI). Residuals for both models  
8  
9 followed standard normal distribution and the model fit was very good. The missing values  
10  
11 were replaced with the predicted values. The predicted variables and the original variables for  
12  
13 both genders were highly correlated,  $r=0.75$  and  $r=0.85$  for boys and girls, respectively.  
14  
15  
16  
17  
18

### 19 *Ethics*

20  
21  
22 The current study has been approved by the Regional Committee for Medical Research Ethics  
23  
24 (2014/1228/REK Sør-Øst A). The Young-HUNT Studies have been approved by REK and the  
25  
26 Data Inspectorate of Norway. Participation in the study was voluntary. Inclusion in Young-  
27  
28 HUNT was based on written consent from participants 16 years of age or older, and from the  
29  
30 parents of those under 16 years of age, in accordance with Norwegian law.  
31  
32  
33  
34  
35  
36  
37  
38  
39  
40  
41  
42  
43  
44  
45  
46  
47  
48  
49  
50  
51  
52  
53  
54  
55  
56  
57  
58  
59  
60

## Results

### *Characteristics of the study population*

In total, 3785 boys and 3834 girls were included in the analyses. Characteristics of the study population are summarized in Table 1. The mean age was 15.8 years (SD 1.7). About 10% reported living in families with an economy below average, and reports of exposure to interpersonal violence was higher among senior as compared to junior high school students, with physical violence being more common in boys, sexual violence more common in girls, and bullying more evenly distributed between the sexes. Girls reported more mental health problems than boys, with the highest levels of psychological distress found among girls in high school (Table 1).

**Table 1** Characteristics of the study population (n =7619)

| Characteristics                             | Girls (%)               |                         | Boys (%)                |                         |
|---------------------------------------------|-------------------------|-------------------------|-------------------------|-------------------------|
|                                             | Junior high<br>N = 2298 | Senior high<br>N = 1536 | Junior high<br>N = 2317 | Senior high<br>N = 1468 |
| Age, mean (SD)                              | 14.6 (0.89)             | 17.6 (0.86)             | 14.6 (0.89)             | 17.5 (0.84)             |
| Socioeconomic status; family economy, n (%) |                         |                         |                         |                         |
| Above average                               | 297 (12.9)              | 264 (17.2)              | 402 (17.4)              | 319 (21.7)              |
| Average                                     | 1644 (71.5)             | 1077 (70.1)             | 1521 (65.6)             | 939 (64.0)              |
| Below average                               | 204 (8.9)               | 144 (9.4)               | 141 (6.1)               | 136 (9.3)               |
| Missing                                     | 153 (6.7)               | 253 (10.9)              | 253 (10.9)              | 74 (5.0)                |
| Puberty (PDS score), mean (SD)              | 2.90 (0.68)             | 3.49 (0.51)             | 2.56 (0.61)             | 3.34 (0.47)             |
| Missing                                     | 10 (0.4)                | 5 (0.3)                 | -                       | 1 (0.0)                 |
| Interpersonal violence, n (%)               |                         |                         |                         |                         |
| Physical violence                           | 122 (5.3)               | 138 (9.0)               | 200 (8.6)               | 246 (16.8)              |
| Missing                                     | 96 (4.2)                | 34 (2.2)                | 167 (7.2)               | 65 (4.4)                |
| Sexual abuse                                | 123 (5.4)               | 169 (11.0)              | 50 (2.2)                | 44 (3.0)                |
| Missing                                     | 103 (4.5)               | 32 (2.1)                | 170 (7.3)               | 58 (4.0)                |
| Bullying                                    | 140 (6.1)               | 129 (8.4)               | 183 (7.9)               | 117 (8.0)               |
| Missing                                     | 107 (4.7)               | 32 (2.1)                | 170 (7.3)               | 58 (4.0)                |
| Mental health outcomes                      |                         |                         |                         |                         |
| Psychological distress (SCL5)*, mean (SD)   |                         |                         |                         |                         |
| SCL5 ≥2                                     | 350 (15.2)              | 362 (23.6)              | 111 (4.8)               | 110 (7.5)               |
| SCL5 <2                                     | 1892 (82.3)             | 1138 (74.1)             | 2093 (90.3)             | 1302 (88.7)             |
| Missing                                     | 56 (2.4)                | 36 (2.3)                | 113 (4.9)               | 56 (3.8)                |
| Self-esteem (RSE)†, mean (SD)               |                         |                         |                         |                         |
| RSE <10                                     | 660 (28.7)              | 442 (28.8)              | 304 (13.1)              | 192 (13.1)              |
| RSE ≥10                                     | 1499 (65.2)             | 1029 (67.0)             | 1847 (79.7)             | 1199 (81.7)             |
| Missing                                     | 139 (6.0)               | 65 (4.2)                | 166 (7.2)               | 77 (5.2)                |
| General well-being, n (%)                   |                         |                         |                         |                         |
| Low life satisfaction                       | 722 (31.4)              | 469 (30.5)              | 373 (16.1)              | 223 (15.2)              |
| High life satisfaction                      | 1525 (66.4)             | 1050 (68.4)             | 1872 (80.8)             | 1212 (82.6)             |
| Missing                                     | 51 (2.2)                | 17 (1.1)                | 72 (3.1)                | 33 (2.2)                |

PDS = Pubertal Development Scale

\* Range 1-4, †Range 4-16

### ***PA level and sport participation***

1  
2  
3  
4  
5  
6 More boys reported a high level of PA (45.2%) compared to girls (35.4%) ( $p < .001$ ). For  
7  
8 both genders, junior high school students reported significantly higher levels of PA than  
9  
10 senior high school students (Table 2). Of the various sports, team sports were most commonly  
11  
12 reported by both girls and boys, with almost two thirds of the adolescents participating in such  
13  
14 sports at least once a week (Table 2). For both genders, participation in team and technical  
15  
16 sports was less common among senior high school students as compared to junior high school  
17  
18 students ( $p < .001$ ). In contrast, a significantly higher proportion of both girls and boys in  
19  
20 senior high school were engaged in strength sports compared to those in junior high school.  
21  
22 Significantly, more girls than boys participated in aesthetic sports, while a higher proportion  
23  
24 of boys participated in strength sports and risk sports, in both age groups (Table 2).  
25  
26  
27  
28  
29  
30  
31  
32  
33  
34  
35  
36  
37  
38  
39  
40  
41  
42  
43  
44  
45  
46  
47  
48  
49  
50  
51  
52  
53  
54  
55  
56  
57  
58  
59  
60

**Table 2** Physical activity (PA) level and sport participation rates in relation to gender and school level

|                                        | Girls (%)   |             |                 | Boys (%)    |             |                 |
|----------------------------------------|-------------|-------------|-----------------|-------------|-------------|-----------------|
|                                        | Junior high | Senior high | <i>p</i> -value | Junior high | Senior high | <i>p</i> -value |
| <b>PA level</b>                        |             |             |                 |             |             |                 |
| High PA                                | 38.4        | 32.4        |                 | 46.5        | 43.8        |                 |
| Moderate PA                            | 39.9        | 34.3        |                 | 33.1        | 28.0        |                 |
| Low PA                                 | 20.2        | 31.6        | <0.001*         | 18.5        | 27.2        | <0.001*         |
| Missing                                | 1.5         | 1.6         |                 | 1.9         | 1.0         |                 |
| <b>Sport participation (≥1 d/week)</b> |             |             |                 |             |             |                 |
| Team sports                            | <b>64.7</b> | <b>49.9</b> | <0.001          | <b>65.8</b> | <b>56.7</b> | <0.001          |
| Endurance sports                       | 46.0        | 45.5        | 0.63            | 51.4        | 49.4        | 0.06            |
| Aesthetic sports                       | 25.9        | 27.3        | 0.43            | 6.0         | 5.2         | 0.25            |
| Strength sports                        | <b>20.5</b> | <b>29.7</b> | <0.001          | <b>33.8</b> | <b>47.6</b> | <0.001          |
| Martial arts                           | 3.5         | 4.4         | 0.17            | 7.6         | 7.6         | 0.85            |
| Technical sports                       | <b>28.0</b> | <b>16.7</b> | <0.001          | <b>26.8</b> | <b>20.8</b> | <0.001          |
| Risk sports                            | 1.0         | 0.8         | 0.71            | 4.6         | 4.7         | 0.99            |

Bold: statistically significant,  $p < 0.05$ , \* chi-square test for trend

Low PA = ≤1 day/week, moderate PA = 2-3 days/week, high PA = ≥4 days/week).

### ***PA and mental health***

A high level of PA, compared to a low level of PA, was significantly associated with reduced odds of low self-esteem and low life satisfaction among all students (Table 3). In senior high school students, a high level of PA was significantly associated with reduced odds of psychological distress (OR = 0.63, 95% CI [0.46-0.86] for girls and OR = 0.46, 95% CI [0.27-0.79] for boys).

### ***Sport participation and mental health***

Participation in team sports, compared with no/infrequent sport participation, was significantly associated with reduced odds of low self-esteem for girls, both in junior high school (OR = 0.45, 95% [0.32-0.64]) and senior high school (OR = 0.57, 95% CI [0.39-0.84]).

A similar non-significant trend was observed in boys (Table 4). Participation in individual sports was significantly associated with reduced odds of low self-esteem among senior high school boys (OR = 0.37, 95% CI [0.18-0.76]).

Participation in team sports was associated with reduced odds of low life satisfaction, especially among girls (Table 4). Among girls in senior high school, team sport participation was also significantly associated with reduced odds of psychological distress (OR = 0.70, 95% CI [0.49 – 1.00]). In boys and junior high school girls, no statistically significant associations between sport participation and psychological distress were revealed in the adjusted models (Table 4).



**Table 3** Associations between levels of physical activity and mental health problems (psychological distress, low self-esteem, and low life satisfaction) among girls and boys in junior and senior high school.

| Physical activity (PA) level                                 | Outcome                                     |                           |                           |                           |
|--------------------------------------------------------------|---------------------------------------------|---------------------------|---------------------------|---------------------------|
|                                                              | OR (OR, 95% CI) for psychological distress* |                           |                           |                           |
|                                                              | Junior high school                          |                           | Senior high school        |                           |
|                                                              | Unadjusted                                  | Adjusted <sup>a</sup>     | Unadjusted                | Adjusted <sup>a</sup>     |
| <b>Girls</b>                                                 |                                             |                           |                           |                           |
| Low PA                                                       | 1.0 (Reference)                             | 1.0 (Reference)           | 1.0 (Reference)           | 1.0 (Reference)           |
| Moderate PA (2-3 d/w)                                        | 0.80 (0.59 – 1.07)                          | 0.86 (0.62 – 1.21)        | <b>0.68 (0.51 – 0.90)</b> | <b>0.73 (0.54 – 0.99)</b> |
| High PA (≥4 d/w)                                             | <b>0.67 (0.49 – 0.91)</b>                   | 0.88 (0.63 – 1.24)        | <b>0.53 (0.39 – 0.72)</b> | <b>0.63 (0.46 – 0.86)</b> |
| <b>Boys</b>                                                  |                                             |                           |                           |                           |
| Low PA                                                       | 1.0 (Reference)                             | 1.0 (Reference)           | 1.0 (Reference)           | 1.0 (Reference)           |
| Moderate PA (2-3 d/w)                                        | <b>0.54 (0.32 – 0.90)</b>                   | <b>0.56 (0.31 – 0.99)</b> | 0.78 (0.49 – 1.23)        | 0.89 (0.53 – 1.49)        |
| High PA (≥4 d/w)                                             | <b>0.58 (0.56 – 0.91)</b>                   | 0.70 (0.41 – 1.18)        | <b>0.38 (0.23 – 0.62)</b> | <b>0.46 (0.27 – 0.79)</b> |
| <b>OR (OR, 95% CI) for low self-esteem (RSE)<sup>†</sup></b> |                                             |                           |                           |                           |
| <b>Girls</b>                                                 |                                             |                           |                           |                           |
| Low PA                                                       | 1.0 (Reference)                             | 1.0 (Reference)           | 1.0 (Reference)           | 1.0 (Reference)           |
| Moderate PA (2-3 d/w)                                        | <b>0.63 (0.48 – 0.82)</b>                   | <b>0.65 (0.49 – 0.87)</b> | <b>0.68 (0.30 – 0.93)</b> | <b>0.72 (0.52 – 0.99)</b> |
| High PA (≥4 d/w)                                             | <b>0.53 (0.40 – 0.70)</b>                   | <b>0.59 (0.44 – 0.80)</b> | <b>0.43 (0.31 – 0.61)</b> | <b>0.49 (0.34 – 0.70)</b> |
| <b>Boys</b>                                                  |                                             |                           |                           |                           |
| Low PA                                                       | 1.0 (Reference)                             | 1.0 (Reference)           | 1.0 (Reference)           | 1.0 (Reference)           |
| Moderate PA (2-3 d/w)                                        | <b>0.37 (0.24 – 0.58)</b>                   | <b>0.32 (0.20 – 0.53)</b> | 0.66 (0.38 – 1.15)        | 0.67 (0.37 – 1.20)        |
| High PA (≥4 d/w)                                             | <b>0.31 (0.20 – 0.48)</b>                   | <b>0.33 (0.21 – 0.52)</b> | <b>0.41 (0.24 – 0.71)</b> | <b>0.44 (0.25 – 0.79)</b> |
| <b>OR (OR, 95% CI) for low life satisfaction</b>             |                                             |                           |                           |                           |
| <b>Girls</b>                                                 |                                             |                           |                           |                           |
| Low PA                                                       | 1.0 (Reference)                             | 1.0 (Reference)           | 1.0 (Reference)           | 1.0 (Reference)           |
| Moderate PA (2-3 d/w)                                        | <b>0.60 (0.48 – 0.76)</b>                   | <b>0.59 (0.45 – 0.76)</b> | <b>0.66 (0.51 – 0.85)</b> | <b>0.68 (0.52 – 0.89)</b> |
| High PA (≥4 d/w)                                             | <b>0.43 (0.34 – 0.55)</b>                   | <b>0.49 (0.37 – 0.63)</b> | <b>0.45 (0.34 – 0.59)</b> | <b>0.51 (0.38 – 0.69)</b> |
| <b>Boys</b>                                                  |                                             |                           |                           |                           |
| Low PA                                                       | 1.0 (Reference)                             | 1.0 (Reference)           | 1.0 (Reference)           | 1.0 (Reference)           |
| Moderate PA (2-3 d/w)                                        | <b>0.67 (0.51 – 0.90)</b>                   | <b>0.65 (0.47 – 0.90)</b> | 0.76 (0.53 – 1.08)        | 0.73 (0.50 – 1.08)        |
| High PA (≥4 d/w)                                             | <b>0.42 (0.32 – 0.56)</b>                   | <b>0.44 (0.32 – 0.60)</b> | <b>0.44 (0.31 – 0.62)</b> | <b>0.43 (0.30 – 0.63)</b> |

OR = odds ratio, CI = confidence interval, Bold: statistically significant associations,  $p < 0.05$ .

\* SCL5  $\geq 2$  (range 0-4), <sup>†</sup> RSE  $< 10$  (range 4-16)

<sup>a</sup> Adjusted for age, puberty score (PDS), socioeconomic status, prior physical violence, prior bullying, prior sexual abuse

**Table 4** Associations between sport participation and mental health problems (psychological distress, low self-esteem, and low life satisfaction) among girls and boys in junior and senior high school.

| Sport participation                                    | Outcome                                     |                           |                           |                           |
|--------------------------------------------------------|---------------------------------------------|---------------------------|---------------------------|---------------------------|
|                                                        | OR (OR, 95% CI) for psychological distress* |                           |                           |                           |
|                                                        | Junior high school                          |                           | Senior high school        |                           |
|                                                        | Unadjusted                                  | Adjusted <sup>a</sup>     | Unadjusted                | Adjusted <sup>a</sup>     |
| <b>Girls</b>                                           |                                             |                           |                           |                           |
| No sport                                               | 1.0 (Reference)                             | 1.0 (Reference)           | 1.0 (Reference)           | 1.0 (Reference)           |
| Individual sports                                      | 1.06 (0.70 – 1.60)                          | 1.09 (0.68 – 1.73)        | 0.87 (0.61 – 1.22)        | 0.93 (0.64 – 1.35)        |
| Team sports                                            | 0.78 (0.53 – 1.14)                          | 1.02 (0.66 – 1.56)        | <b>0.56 (0.40 – 0.78)</b> | <b>0.70 (0.49 – 1.00)</b> |
| <b>Boys</b>                                            |                                             |                           |                           |                           |
| No sport                                               | 1.0 (Reference)                             | 1.0 (Reference)           | 1.0 (Reference)           | 1.0 (Reference)           |
| Individual sports                                      | 1.04 (0.56 – 1.95)                          | 1.04 (0.52 – 2.09)        | 0.85 (0.49 – 1.49)        | 0.98 (0.51 – 1.88)        |
| Team sports                                            | <b>0.55 (0.31 – 0.99)</b>                   | 0.60 (0.31 – 1.15)        | <b>0.57 (0.34 – 0.96)</b> | 0.93 (0.50 – 1.70)        |
| <b>OR (OR, 95% CI) for low self-esteem<sup>†</sup></b> |                                             |                           |                           |                           |
| <b>Girls</b>                                           |                                             |                           |                           |                           |
| No sport                                               | 1.0 (Reference)                             | 1.0 (Reference)           | 1.0 (Reference)           | 1.0 (Reference)           |
| Individual sports                                      | <b>0.52 (0.37 – 0.75)</b>                   | <b>0.55 (0.37 – 0.81)</b> | 0.77 (0.53 – 1.11)        | 0.81 (0.55 – 1.20)        |
| Team sports                                            | <b>0.42 (0.30 – 0.57)</b>                   | <b>0.45 (0.32 – 0.64)</b> | <b>0.50 (0.35 – 0.71)</b> | <b>0.57 (0.39 – 0.84)</b> |
| <b>Boys</b>                                            |                                             |                           |                           |                           |
| No sport                                               | 1.0 (Reference)                             | 1.0 (Reference)           | 1.0 (Reference)           | 1.0 (Reference)           |
| Individual sports                                      | 1.11 (0.62 – 1.99)                          | 1.43 (0.73 – 2.79)        | <b>0.42 (0.22 – 0.82)</b> | <b>0.37 (0.18 – 0.76)</b> |
| Team sports                                            | <b>0.53 (0.30 – 0.92)</b>                   | 0.72 (0.38 – 1.36)        | <b>0.47 (0.27 – 0.81)</b> | 0.57 (0.32 – 1.03)        |
| <b>OR (OR, 95% CI) for low life satisfaction</b>       |                                             |                           |                           |                           |
| <b>Girls</b>                                           |                                             |                           |                           |                           |
| No sport                                               | 1.0 (Reference)                             | 1.0 (Reference)           | 1.0 (Reference)           | 1.0 (Reference)           |
| Individual sports                                      | <b>0.70 (0.51 – 0.96)</b>                   | 0.71 (0.50 – 1.00)        | <b>0.66 (0.48 – 0.91)</b> | <b>0.65 (0.46 – 0.91)</b> |
| Team sports                                            | <b>0.46 (0.34 – 0.61)</b>                   | <b>0.51 (0.37 – 0.70)</b> | <b>0.48 (0.36 – 0.65)</b> | <b>0.55 (0.40 – 0.76)</b> |
| <b>Boys</b>                                            |                                             |                           |                           |                           |
| No sport                                               | 1.0 (Reference)                             | 1.0 (Reference)           | 1.0 (Reference)           | 1.0 (Reference)           |
| Individual sports                                      | 1.00 (0.68 – 1.46)                          | 0.99 (0.65 – 1.52)        | 0.84 (0.55 – 1.29)        | 0.80 (0.50 – 1.28)        |
| Team sports                                            | <b>0.56 (0.39 – 0.79)</b>                   | <b>0.63 (0.43 – 0.93)</b> | <b>0.62 (0.42 – 0.92)</b> | 0.72 (0.47 – 1.12)        |

OR = odds ratio, CI = confidence interval, Bold: statistically significant associations,  $p < 0.05$ .

\* SCL5  $\geq 2$  (range 0-4), <sup>†</sup> RSE  $< 10$  (range 4-16)

<sup>a</sup> Adjusted for age, puberty score (PDS), socioeconomic status, prior physical violence, prior bullying, prior sexual abuse

## Discussion

In this population-based sample of adolescents, PA levels and participation rates in sports were lower among girls, and lower among senior high school students compared to junior high school students. Our results showed associations between higher levels of PA and reduced odds of mental health problems throughout adolescence, particularly in senior high school students. Further, team sport participation was associated with mental health benefits, especially for girls.

### Strengths and limitations

The main strengths of our study include the large sample size of adolescents from an unselected general population, a high participation rate (73%), and the information including frequency of participation in sports. To our knowledge, such comprehensive information about sport participation in relation to gender and age differences has not previously been presented. This information enabled us to examine the relationship between sport participation and mental health outcomes, including the aspect of various types of sports, in contrast to most studies on this topic which mainly focus on general PA. We used validated measures of mental health outcomes. Another strength is that we were able to adjust for a variety of possible confounders, as well as including interpersonal violence as important risk factors for mental health problems among adolescents.

The main limitation of this study is the cross-sectional study design, and the resultant inability to demonstrate the direction of the association. Further, as measures were self-reported, the included variables are susceptible to information bias. Although the response rate in Young-HUNT3 was high, the lower response among senior high school students compared to junior high school students may represent a selection bias. In Norway, most

1  
2  
3 adolescents start senior high school the year they turn 16. Differences in school systems in  
4  
5 other countries, as well as differences related to opportunities for engagement in sports and  
6  
7 the organization of various youth sports may limit the generalizability of the results from this  
8  
9 study.  
10  
11  
12  
13

### 14 **Our results according to previous findings, and interpretation of findings**

15  
16 The findings from this study confirmed the gender differences in PA levels found in other  
17  
18 population-based studies, with girls being less physically active than boys <sup>11-13</sup>. Also in line  
19  
20 with reports from other studies, fewer girls were involved in sports <sup>7 13 14 25</sup>. The lower levels  
21  
22 of PA and sport participation found among senior high school students confirms findings  
23  
24 from previous studies reporting a decline in PA during adolescence <sup>10 11 26 27</sup>, especially  
25  
26 between the ages of 15 and 16 years <sup>11</sup>. In this study, lower participation rates among senior  
27  
28 high school students compared to junior high school students were most evident in team  
29  
30 sports, indicating a need for efforts to reduce drop out from these types of sports. Drop out  
31  
32 from sports for adolescents at this age may be related, in part, to the difficulty of meeting the  
33  
34 increasing demands of participation in both school and sport <sup>7 28</sup>. However, a systematic  
35  
36 review of factors associated with drop out from organized sports, reported that lack of  
37  
38 enjoyment and perceptions of competence are the two most dominant factors related to drop  
39  
40 out from sports among adolescents <sup>28</sup>.  
41  
42  
43  
44  
45

46  
47 The current findings are in line with previous studies reporting a positive relationship  
48  
49 between adolescents' PA and mental health, including lower likelihood of depressive  
50  
51 symptoms <sup>1 11 13 29 30</sup>, greater well-being <sup>13</sup>, and better self-esteem <sup>1 30</sup>, and with longitudinal  
52  
53 studies indicating that PA may protect against the development of depression <sup>31 32</sup>. PA may  
54  
55 also be helpful for adolescents struggling with mental health problems <sup>33 34</sup>. Regarding  
56  
57  
58  
59  
60

1  
2  
3 engagement in sports, the results of the present study are also in accordance with the literature  
4  
5 indicating a positive relationship between sport participation and mental health <sup>9 13 35-37</sup>.  
6  
7  
8  
9

10 The findings from this study make several contributions to the body of research on the  
11 impact of PA and sports on mental health among adolescents. Firstly, age differences were  
12 revealed in these relationships, as a high PA level was associated with reduced psychological  
13 distress in high school students only. Secondly, this study shows that the potential beneficial  
14 effects related to mental health vary across types of sport. Participation in team sports,  
15 compared to no participation, was more strongly related to beneficial mental health outcomes  
16 than individual sports compared to no participation, especially in high school girls. Other  
17 studies have reported that organized sports had a greater impact on depressive symptoms  
18 among girls than boys <sup>11</sup>, and that team sports may confer mental health benefits for girls in  
19 particular <sup>13</sup>. A systematic review of the psychological and social benefits of sport  
20 participation argued that team sports seem to be associated with more beneficial outcomes  
21 compared to individual sports due to the social aspect of being part of a team <sup>9</sup>. In a recent  
22 study of a large representative sample of European adolescents, lower levels of anxiety and  
23 depression and higher levels of well-being were found among team sport participants <sup>13</sup>. Team  
24 sport participation during adolescence has also been shown to be associated with lower levels  
25 of depressive symptoms in early adulthood <sup>36 38</sup>. In line with this, our findings highlight that  
26 type of sport, including the social aspect of participation, should be considered when  
27 examining the impact of sports on mental health among adolescents.  
28  
29  
30  
31  
32  
33  
34  
35  
36  
37  
38  
39  
40  
41  
42  
43  
44  
45  
46  
47  
48  
49  
50

51 Overall, adolescents with a high PA and team sport participation had lower odds of  
52 having low self-esteem than of having psychological distress. These results are in accordance  
53 with findings from a review study showing that, of the several mental health outcomes  
54 associated with PA in young people, the strongest association was with self-esteem <sup>1</sup>. It may  
55  
56  
57  
58  
59  
60

1  
2  
3 be that experiences of low self-esteem occur earlier than symptoms of anxiety and depression  
4 and that low self-esteem may trigger poor coping behavior and risk behavior that  
5  
6 subsequently increases the likelihood of mental disorders <sup>39</sup>. A Cochrane review reports that  
7  
8 exercise interventions have positive short-term effects on self-esteem that may help to prevent  
9  
10 the development of psychological and behavioral problems <sup>40</sup>.  
11  
12  
13

14 This study contributes to our understanding of the implications lower levels of PA  
15  
16 may have on mental health in different phases of adolescence. Regardless of the direction of  
17  
18 the association between PA and mental health, our findings indicate that inactive adolescents  
19  
20 may carry a “double health burden”, with both physical and mental health challenges. To help  
21  
22 more adolescents increase or maintain their levels of PA, interventions could include  
23  
24 facilitation of a wider variety of sports activities, and at different skill levels, to reach and  
25  
26 engage more adolescents. As lack of enjoyment has previously been found to be the most  
27  
28 dominant factor related to drop out from sports, increased focus on the joy of sports may be  
29  
30 important in order to reduce drop-out rates during adolescence. In efforts to reduce mental  
31  
32 health problems, our results suggest that girls in particular should be a target group for  
33  
34 promotion of team sport participation.  
35  
36  
37  
38  
39  
40  
41  
42

### 43 **Conclusion and implications**

44  
45 This study identified gender and age differences in PA and sport participation across  
46  
47 adolescent age-groups, with the lowest engagement in PA and sports found among girls in  
48  
49 senior high school. Our results indicate that a high PA level and sport participation have a  
50  
51 positive impact on various dimensions of mental health throughout adolescence, highlighting  
52  
53 the importance of continuing with sports in the late teens. The findings underline a need for  
54  
55 interventions aimed at maintaining or increasing PA and sport participation, especially for  
56  
57 girls around the transition to senior high school. Initiatives to help adolescents continue in  
58  
59  
60

1  
2  
3 team sports may be particularly advantageous. Future studies should examine the effect of  
4 interventions for encouraging and increasing PA and sport participation among adolescents,  
5  
6 as well as their potential impact on mental health problems.  
7  
8  
9  
10  
11  
12  
13  
14  
15

## 16 **References**

- 17
- 18
- 19 1. Biddle SJ, Asare M. Physical activity and mental health in children and adolescents: a  
20 review of reviews. *British journal of sports medicine* 2011;45:886-95.
- 21 2. Hallal PC, Victora CG, Azevedo MR, et al. Adolescent physical activity and health: a  
22 systematic review. *Sports medicine (Auckland, NZ)* 2006;36:1019-30.
- 23 3. Strong WB, Malina RM, Blimkie CJ, et al. Evidence based physical activity for school-age  
24 youth. *The Journal of pediatrics* 2005;146:732-7.
- 25 4. Biddle SJ, Gorely T, Stensel DJ. Health-enhancing physical activity and sedentary  
26 behaviour in children and adolescents. *Journal of sports sciences* 2004;22:679-701.
- 27 5. Sawyer SM, Afifi RA, Bearinger LH, et al. Adolescence: a foundation for future health.  
28 *Lancet* 2012;379:1630-40.
- 29 6. Tammelin T, Nayha S, Hills AP, et al. Adolescent participation in sports and adult physical  
30 activity. *Am J Prev Med* 2003;24:22-8.
- 31 7. Kjonniksen L, Anderssen N, Wold B. Organized youth sport as a predictor of physical  
32 activity in adulthood. *Scandinavian journal of medicine & science in sports*  
33 2009;19:646-54.
- 34 8. Belanger M, Sabiston CM, Barnett TA, et al. Number of years of participation in some, but  
35 not all, types of physical activity during adolescence predicts level of physical activity  
36 in adulthood: Results from a 13-year study. *The international journal of behavioral*  
37 *nutrition and physical activity* 2015;12:76.
- 38 9. Eime RM, Young JA, Harvey JT, et al. A systematic review of the psychological and social  
39 benefits of participation in sport for children and adolescents: informing development  
40 of a conceptual model of health through sport. *The international journal of behavioral*  
41 *nutrition and physical activity* 2013;10:98.
- 42 10. Dumith SC, Gigante DP, Domingues MR, et al. Physical activity change during  
43 adolescence: a systematic review and a pooled analysis. *International journal of*  
44 *epidemiology* 2011;40:685-98.
- 45 11. Baldursdottir B, Valdimarsdottir HB, Krettek A, et al. Age-related differences in physical  
46 activity and depressive symptoms among 10–19-year-old adolescents: A population  
47 based study. *Psychology of Sport and Exercise* 2017;28:91-99.
- 48 12. Hallal PC, Andersen LB, Bull FC, et al. Global physical activity levels: surveillance  
49 progress, pitfalls, and prospects. *Lancet* 2012;380:247-57.
- 50 13. McMahon EM, Corcoran P, O'Regan G, et al. Physical activity in European adolescents  
51 and associations with anxiety, depression and well-being. *Eur Child Adolesc*  
52 *Psychiatry* 2017;26:111-122.
- 53 14. Pate RR, Trost SG, Levin S, et al. Sports participation and health-related behaviors among  
54 US youth. *Arch Pediatr Adolesc Med* 2000;154:904-11.  
55  
56  
57  
58  
59  
60



15. Belfer ML. Child and adolescent mental disorders: the magnitude of the problem across the globe. *Journal of child psychology and psychiatry, and allied disciplines* 2008;49:226-36.
16. Kieling C, Baker-Henningham H, Belfer M, et al. Child and adolescent mental health worldwide: evidence for action. *Lancet* 2011;378:1515-25.
17. Bertha EA, Balazs J. Subthreshold depression in adolescence: a systematic review. *Eur Child Adolesc Psychiatry* 2013;22:589-603.
18. Fergusson DM, Horwood LJ, Ridder EM, et al. Subthreshold depression in adolescence and mental health outcomes in adulthood. *Archives of general psychiatry* 2005;62:66-72.
19. Rangul V, Holmen TL, Kurtze N, et al. Reliability and validity of two frequently used self-administered physical activity questionnaires in adolescents. *BMC medical research methodology* 2008;8:47.
20. Strand BH, Dalgard OS, Tambs K, et al. Measuring the mental health status of the Norwegian population: a comparison of the instruments SCL-25, SCL-10, SCL-5 and MHI-5 (SF-36). *Nordic journal of psychiatry* 2003;57:113-8.
21. Rosenberg M. Society and the Adolescent Self-Image. Revised edition. Middletown, CT: Wesleyan University Press 1989.
22. Isomaa R, Vaananen JM, Frojd S, et al. How low is low? Low self-esteem as an indicator of internalizing psychopathology in adolescence. *Health Educ Behav* 2013;40:392-9.
23. Petersen AC, Crockett L, Richards M, et al. A self-report measure of pubertal status: Reliability, validity, and initial norms. *Journal of youth and adolescence* 1988;17:117-33.
24. Stensland SO, Zwart JA, Wentzel-Larsen T, et al. The headache of terror: A matched cohort study of adolescents from the Utoya and the HUNT Study. *Neurology* 2018;90:111-18.
25. Marques A, Ekelund U, Sardinha LB. Associations between organized sports participation and objectively measured physical activity, sedentary time and weight status in youth. *Journal of science and medicine in sport / Sports Medicine Australia* 2016;19:154-7.
26. Dalene KE, Anderssen SA, Andersen LB, et al. Secular and longitudinal physical activity changes in population-based samples of children and adolescents. *Scandinavian journal of medicine & science in sports* 2018;28:161-71.
27. Sagatun A, Kolle E, Anderssen SA, et al. Three-year follow-up of physical activity in Norwegian youth from two ethnic groups: associations with socio-demographic factors. *BMC public health* 2008;8:419.
28. Crane J TV. A systematic review of dropout from organized sport among children and youth. *European Physical Education Review* 2015;21:114-31.
29. Korczak DJ, Madigan S, Colasanto M. Children's Physical Activity and Depression: A Meta-analysis. *Pediatrics* 2017;139. doi: 10.1542/peds.2016-2266. Epub 2017 Mar 21.
30. Ahn S, Fedewa AL. A meta-analysis of the relationship between children's physical activity and mental health. *J Pediatr Psychol* 2011;36:385-97.
31. Jerstad SJ, Boutelle KN, Ness KK, et al. Prospective reciprocal relations between physical activity and depression in female adolescents. *J Consult Clin Psychol* 2010;78:268-72.
32. McPhie ML, Rawana JS. The effect of physical activity on depression in adolescence and emerging adulthood: a growth-curve analysis. *Journal of adolescence* 2015;40:83-92.
33. Stubbs B, Vancampfort D, Hallgren M, et al. EPA guidance on physical activity as a treatment for severe mental illness: a meta-review of the evidence and Position Statement from the European Psychiatric Association (EPA), supported by the International Organization of Physical Therapists in Mental Health (IOPTMH).



- 1  
2  
3 *European psychiatry: the journal of the Association of European Psychiatrists*  
4 2018;54:124-44.
- 5 34. Bailey AP, Hetrick SE, Rosenbaum S, et al. Treating depression with physical activity in  
6 adolescents and young adults: a systematic review and meta-analysis of randomised  
7 controlled trials. *Psychological Medicine* 2017;1-20.
- 8 35. Jewett R, Sabiston CM, Brunet J, et al. School sport participation during adolescence and  
9 mental health in early adulthood. *The Journal of adolescent health: official publication*  
10 *of the Society for Adolescent Medicine* 2014;55:640-4.
- 11 36. Brunet J, Sabiston CM, Chaiton M, et al. The association between past and current  
12 physical activity and depressive symptoms in young adults: a 10-year prospective  
13 study. *Ann Epidemiol* 2013;23:25-30. doi: 10.1016/j.annepidem.2012.10.006
- 14 37. Evans MB, Allan V, Erickson K, et al. Are all sport activities equal? A systematic review  
15 of how youth psychosocial experiences vary across differing sport activities. *British*  
16 *journal of sports medicine* 2017;51:169-76.
- 17 38. Sabiston CM, Jewett R, Ashdown-Franks G, et al. Number of Years of Team and  
18 Individual Sport Participation During Adolescence and Depressive Symptoms in Early  
19 Adulthood. *J Sport Exerc Psychol* 2016;38:105-10.
- 20 39. Mann M, Hosman CM, Schaalma HP, et al. Self-esteem in a broad-spectrum approach for  
21 mental health promotion. *Health education research* 2004;19:357-72.
- 22 40. Ekeland E, Heian F, Hagen KB, et al. Exercise to improve self-esteem in children and  
23 young people. *The Cochrane database of systematic reviews* 2004;1:CD003683. doi:  
24 10.1002/14651858.CD003683.pub2
- 25  
26  
27  
28  
29  
30  
31  
32  
33  
34  
35  
36  
37  
38  
39  
40  
41  
42  
43  
44  
45  
46  
47  
48  
49  
50  
51  
52  
53  
54  
55  
56  
57  
58  
59  
60

**Appendix.** Flow chart of the study sample.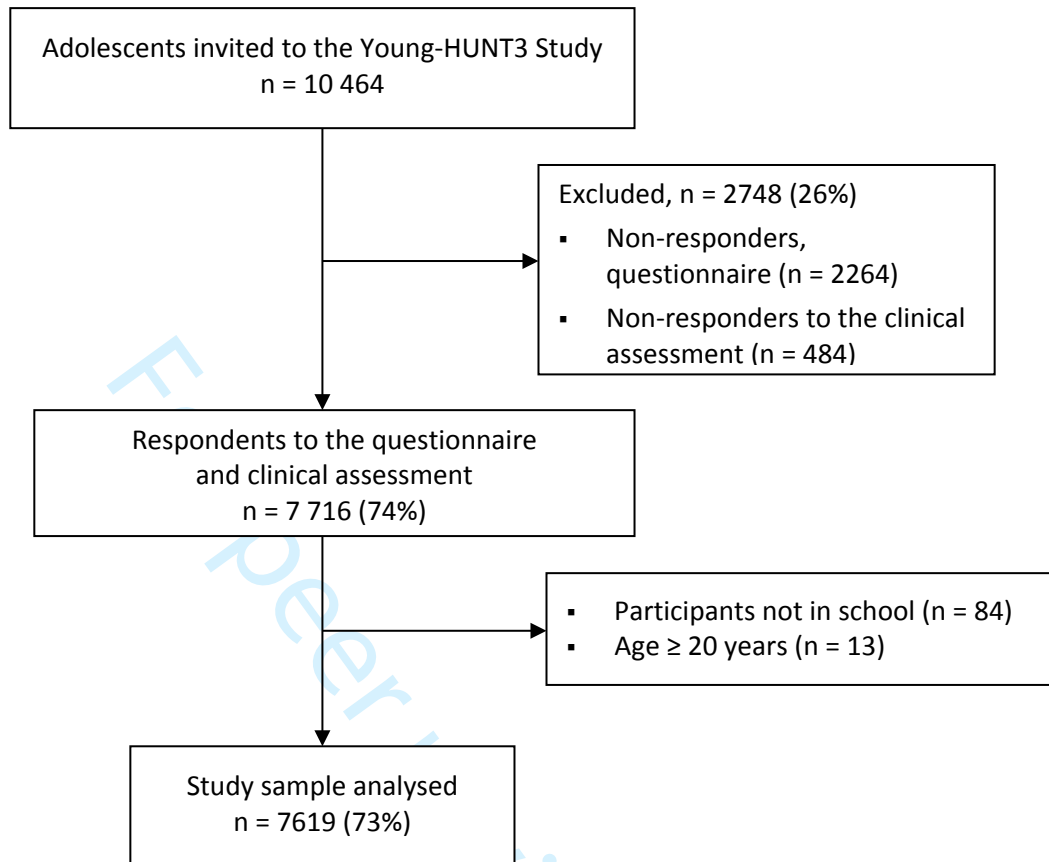

1  
2  
3 **Contributors:** MHG processed, analysed and interpreted the data and drafted the initial  
4 manuscript. SØS, KS and JAZ were involved in the conception and design of the manuscript,  
5 as well as data interpretation and critical review and revision of the manuscript. MCS  
6 supervised the statistical analyses. MSC and MBJ were involved in data interpretation, critical  
7 review and revision of the manuscript. All authors have read and approved the final  
8 manuscript.  
9

10  
11 **Acknowledgements:** We would like to thank the adolescents participating in the adolescent  
12 part of the Nord-Trøndelag Health Study (Young-HUNT3) and the HUNT research centre for  
13 their cooperation. The HUNT Study is a collaboration between HUNT Research Centre  
14 (Faculty of Medicine and Health Sciences, Norwegian University of Science and Technology  
15 NTNU), Nord-Trøndelag County Council, Central Norway Regional Health Authority, and  
16 the Norwegian Institute of Public Health. This work was funded by The Norwegian Fund for  
17 Post-Graduate Training in Physiotherapy.  
18  
19

20  
21 **Funding:** This work was supported by The Norwegian Fund for Post-Graduate Training in  
22 Physiotherapy, Grant number 61741.  
23

24  
25 **Competing interests:** None declared.  
26

27  
28 **Patient consent:** Not required.  
29

30  
31 **Ethics approval:** Inclusion was based on written consent from participants aged 16 years and  
32 older and from parents for those under 16, in accordance with Norwegian law. The current  
33 study was approved by the Regional Committee for Medical Research Ethics (REK)  
34 (2014/1228/REK Sør-Øst A). The Young-HUNT Studies have been approved by REK and the  
35 Data Inspectorate of Norway.  
36

37  
38 **Data sharing statement:** The data set analysed belongs to a third party, the Nord-Trøndelag  
39 Health Study (HUNT Study). The authors of the current manuscript have been given  
40 permission to analyse the data after obtaining the necessary Norwegian permits. Research  
41  
42  
43  
44  
45  
46  
47  
48  
49  
50  
51  
52  
53  
54  
55  
56  
57  
58  
59  
60

1  
2  
3 groups wishing to analyse data from the HUNT study may apply to the HUNT organization to  
4 get access to the data (<https://www.ntnu.no/hunt/datatilgang>). HUNT databank online  
5  
6 provides a complete overview of the research variables, as well as metadata ([db.medisin.ntnu.no/hunt-db/#/survey/YH3](https://hunt-<br/>7<br/>8<br/>9<br/>10<br/>11<br/>12<br/>13<br/>14<br/>15<br/>16<br/>17<br/>18<br/>19<br/>20<br/>21<br/>22<br/>23<br/>24<br/>25<br/>26<br/>27<br/>28<br/>29<br/>30<br/>31<br/>32<br/>33<br/>34<br/>35<br/>36<br/>37<br/>38<br/>39<br/>40<br/>41<br/>42<br/>43<br/>44<br/>45<br/>46<br/>47<br/>48<br/>49<br/>50<br/>51<br/>52<br/>53<br/>54<br/>55<br/>56<br/>57<br/>58<br/>59<br/>60)). The general health questionnaire used in the  
study is accessible from the HUNT Bio-And-Databank (<http://www.ntnu.edu/hunt/data/que>).

**Provenance and peer review:** Not commissioned; externally peer reviewed.

For peer review only

**STROBE 2007 (v4) Statement—Checklist of items that should be included in reports of *cross-sectional studies***

| Section/Topic                | Item # | Recommendation                                                                                                                                                                       | Reported on page # |
|------------------------------|--------|--------------------------------------------------------------------------------------------------------------------------------------------------------------------------------------|--------------------|
| <b>Title and abstract</b>    | 1      | (a) Indicate the study’s design with a commonly used term in the title or the abstract                                                                                               | 2                  |
|                              |        | (b) Provide in the abstract an informative and balanced summary of what was done and what was found                                                                                  | 2                  |
| <b>Introduction</b>          |        |                                                                                                                                                                                      |                    |
| Background/rationale         | 2      | Explain the scientific background and rationale for the investigation being reported                                                                                                 | 4-5                |
| Objectives                   | 3      | State specific objectives, including any prespecified hypotheses                                                                                                                     | 5                  |
| <b>Methods</b>               |        |                                                                                                                                                                                      |                    |
| Study design                 | 4      | Present key elements of study design early in the paper                                                                                                                              | 2, 5               |
| Setting                      | 5      | Describe the setting, locations, and relevant dates, including periods of recruitment, exposure, follow-up, and data collection                                                      | 5                  |
| Participants                 | 6      | (a) Give the eligibility criteria, and the sources and methods of selection of participants                                                                                          | 5                  |
| Variables                    | 7      | Clearly define all outcomes, exposures, predictors, potential confounders, and effect modifiers. Give diagnostic criteria, if applicable                                             | 5-8                |
| Data sources/<br>measurement | 8*     | For each variable of interest, give sources of data and details of methods of assessment (measurement). Describe comparability of assessment methods if there is more than one group | 5-8                |
| Bias                         | 9      | Describe any efforts to address potential sources of bias                                                                                                                            | 7-8                |
| Study size                   | 10     | Explain how the study size was arrived at                                                                                                                                            | 5                  |
| Quantitative variables       | 11     | Explain how quantitative variables were handled in the analyses. If applicable, describe which groupings were chosen and why                                                         | 5-8                |
| Statistical methods          | 12     | (a) Describe all statistical methods, including those used to control for confounding                                                                                                | 8-9                |
|                              |        | (b) Describe any methods used to examine subgroups and interactions                                                                                                                  | 8-9                |
|                              |        | (c) Explain how missing data were addressed                                                                                                                                          | 9                  |
|                              |        | (d) If applicable, describe analytical methods taking account of sampling strategy                                                                                                   |                    |
|                              |        | (e) Describe any sensitivity analyses                                                                                                                                                |                    |

|                          |     |                                                                                                                                                                                                              |       |
|--------------------------|-----|--------------------------------------------------------------------------------------------------------------------------------------------------------------------------------------------------------------|-------|
| <b>Results</b>           |     |                                                                                                                                                                                                              |       |
| Participants             | 13* | (a) Report numbers of individuals at each stage of study—eg numbers potentially eligible, examined for eligibility, confirmed eligible, included in the study, completing follow-up, and analysed            | 5, 24 |
|                          |     | (b) Give reasons for non-participation at each stage                                                                                                                                                         | 5, 24 |
|                          |     | (c) Consider use of a flow diagram                                                                                                                                                                           | 24    |
| Descriptive data         | 14* | (a) Give characteristics of study participants (eg demographic, clinical, social) and information on exposures and potential confounders                                                                     | 10-11 |
|                          |     | (b) Indicate number of participants with missing data for each variable of interest                                                                                                                          | 11    |
| Outcome data             | 15* | Report numbers of outcome events or summary measures                                                                                                                                                         | 14    |
| Main results             | 16  | (a) Give unadjusted estimates and, if applicable, confounder-adjusted estimates and their precision (eg, 95% confidence interval). Make clear which confounders were adjusted for and why they were included | 15-16 |
|                          |     | (b) Report category boundaries when continuous variables were categorized                                                                                                                                    | 15-16 |
|                          |     | (c) If relevant, consider translating estimates of relative risk into absolute risk for a meaningful time period                                                                                             |       |
| Other analyses           | 17  | Report other analyses done—eg analyses of subgroups and interactions, and sensitivity analyses                                                                                                               |       |
| <b>Discussion</b>        |     |                                                                                                                                                                                                              |       |
| Key results              | 18  | Summarise key results with reference to study objectives                                                                                                                                                     | 17    |
| Limitations              | 19  | Discuss limitations of the study, taking into account sources of potential bias or imprecision. Discuss both direction and magnitude of any potential bias                                                   | 17-18 |
| Interpretation           | 20  | Give a cautious overall interpretation of results considering objectives, limitations, multiplicity of analyses, results from similar studies, and other relevant evidence                                   | 18-20 |
| Generalisability         | 21  | Discuss the generalisability (external validity) of the study results                                                                                                                                        | 17-18 |
| <b>Other information</b> |     |                                                                                                                                                                                                              |       |
| Funding                  | 22  | Give the source of funding and the role of the funders for the present study and, if applicable, for the original study on which the present article is based                                                | 25    |

\*Give information separately for cases and controls in case-control studies and, if applicable, for exposed and unexposed groups in cohort and cross-sectional studies.

**Note:** An Explanation and Elaboration article discusses each checklist item and gives methodological background and published examples of transparent reporting. The STROBE checklist is best used in conjunction with this article (freely available on the Web sites of PLoS Medicine at <http://www.plosmedicine.org/>, Annals of Internal Medicine at <http://www.annals.org/>, and Epidemiology at <http://www.epidem.com/>). Information on the STROBE Initiative is available at [www.strobe-statement.org](http://www.strobe-statement.org).

# BMJ Open

**Physical activity and sport participation among adolescents:  
associations with mental health in different age groups.  
Results from the Young-HUNT Study, a cross sectional  
survey**

|                                 |                                                                                                                                                                                                                                                                                                                                                                                                                                                                                                                                                                                                                                                                                                                                                                                                                                                                       |
|---------------------------------|-----------------------------------------------------------------------------------------------------------------------------------------------------------------------------------------------------------------------------------------------------------------------------------------------------------------------------------------------------------------------------------------------------------------------------------------------------------------------------------------------------------------------------------------------------------------------------------------------------------------------------------------------------------------------------------------------------------------------------------------------------------------------------------------------------------------------------------------------------------------------|
| Journal:                        | <i>BMJ Open</i>                                                                                                                                                                                                                                                                                                                                                                                                                                                                                                                                                                                                                                                                                                                                                                                                                                                       |
| Manuscript ID                   | bmjopen-2018-028555.R1                                                                                                                                                                                                                                                                                                                                                                                                                                                                                                                                                                                                                                                                                                                                                                                                                                                |
| Article Type:                   | Research                                                                                                                                                                                                                                                                                                                                                                                                                                                                                                                                                                                                                                                                                                                                                                                                                                                              |
| Date Submitted by the Author:   | 05-Mar-2019                                                                                                                                                                                                                                                                                                                                                                                                                                                                                                                                                                                                                                                                                                                                                                                                                                                           |
| Complete List of Authors:       | Guddal, Maren; Research and Communication Unit for Musculoskeletal Health (FORMI); Faculty of Medicine, University of Oslo<br>Stensland, Synne; Research and Communication Unit for Musculoskeletal Health (FORMI); Norwegian Centre for Violence and Traumatic Stress Studies, NKVTS<br>Småstuen, Milada; Research and Communication Unit for Musculoskeletal Health (FORMI); Faculty of Health Sciences, Oslo Metropolitan University<br>Bakke Johnsen, Marianne ; Research and Communication Unit for Musculoskeletal Health (FORMI); Faculty of Medicine, University of Oslo<br>Zwart, John-Anker; Research and Communication Unit for Musculoskeletal Health (FORMI); Faculty of Medicine, University of Oslo<br>Storheim, Kjersti; Research and Communication Unit for Musculoskeletal Health (FORMI); Faculty of Health Sciences, Oslo Metropolitan University |
| <b>Primary Subject Heading</b>: | Epidemiology                                                                                                                                                                                                                                                                                                                                                                                                                                                                                                                                                                                                                                                                                                                                                                                                                                                          |
| Secondary Subject Heading:      | Epidemiology, Mental health, Public health, Sports and exercise medicine                                                                                                                                                                                                                                                                                                                                                                                                                                                                                                                                                                                                                                                                                                                                                                                              |
| Keywords:                       | EPIDEMIOLOGY, PUBLIC HEALTH, SPORTS MEDICINE                                                                                                                                                                                                                                                                                                                                                                                                                                                                                                                                                                                                                                                                                                                                                                                                                          |
|                                 |                                                                                                                                                                                                                                                                                                                                                                                                                                                                                                                                                                                                                                                                                                                                                                                                                                                                       |

SCHOLARONE™  
Manuscripts

1  
2  
3 **Physical activity and sport participation among adolescents: associations with**  
4 **mental health in different age groups. Results from the Young-HUNT Study, a cross**  
5 **sectional survey**  
6  
7  
8

9 Maren Hjelle Guddal, PT, MSc <sup>1,2\*</sup>

10 \* Corresponding author

11 Email: [m.h.guddal@studmed.uio.no](mailto:m.h.guddal@studmed.uio.no)

12 Phone number: +47 97663176

13 Postal Address:

14 FORMI, Oslo University Hospital, Ullevaal. Building 37 B

15 Post box 4956 Nydalen

16 NO-0424 Oslo

17 Norway  
18  
19  
20

21 Synne Øien Stensland, MD, PhD <sup>1,3</sup>

22 Email: [synne.stensland@nkvts.no](mailto:synne.stensland@nkvts.no)

23  
24 Milada Cvancarova Småstuen, PhD <sup>1,4</sup>

25 Email: [miladacv@medisin.uio.no](mailto:miladacv@medisin.uio.no)

26  
27  
28 Marianne Bakke Johnsen, PT, PhD <sup>1,2</sup>

29 Email: [m.b.johnsen@medisin.uio.no](mailto:m.b.johnsen@medisin.uio.no)

30  
31 John-Anker Zwart, MD, PhD <sup>1,2</sup>

32 Email: [j.a.zwart@medisin.uio.no](mailto:j.a.zwart@medisin.uio.no)

33  
34  
35 Kjersti Storheim, PT, PhD <sup>1,4</sup>

36 Email: [kjersti.storheim@medisin.uio.no](mailto:kjersti.storheim@medisin.uio.no)

37  
38 <sup>1</sup> Research and Communication Unit for Musculoskeletal Health (FORMI), Oslo University  
39 Hospital, Oslo, Norway

40 <sup>2</sup> Faculty of Medicine, University of Oslo, Norway

41 <sup>3</sup> Norwegian Centre for Violence and Traumatic Stress Studies, Oslo, Norway

42 <sup>4</sup> Faculty of Health Sciences, Oslo Metropolitan University, Oslo, Norway  
43  
44  
45  
46  
47  
48  
49  
50  
51

52 **Manuscript word count: 3997**

53 **Abstract word count: 299**  
54  
55  
56  
57  
58  
59  
60



## Abstract

**Objectives:** Knowledge of how physical activity (PA) and sport participation are related to mental health throughout adolescence is scarce. Our objective was to describe PA levels and sport participation in a population-based sample of adolescents, and to explore how they relate to mental health in different age groups.

**Design:** A population-based cross-sectional study.

**Setting and participants:** The adolescent part of the Nord-Trøndelag Health Study (Young-HUNT3), a Norwegian population-based health survey conducted from 2006-2008. Of 10464 invited participants (age 13-19 years), 7619 (73%) participated, of whom 3785 (50%) were boys.

**Outcome measures:** Mental health outcomes included psychological distress assessed using a short version of the Hopkins Symptom Check List (SCL-5), self-esteem assessed using a short version of The Rosenberg Self-Esteem Scale (RSES) and life satisfaction assessed with a single-item satisfaction with life measure.

**Method:** Logistic regression models were used to estimate the likelihood of psychological distress, low self-esteem, and low life satisfaction, according to self-reported PA level and type of sport participation, stratified by gender and school level (junior vs senior high school).

**Results:** Fewer senior high school students participated in team sports compared to junior high school students ( $p < 0.001$ ). Physically active adolescents and participants in team sports had higher self-esteem and life satisfaction. A high PA level, compared to a low PA level, was associated with reduced odds of psychological distress among senior high school students (Odds ratio [OR] = 0.63, 95% confidence interval [CI] [0.46-0.86] for girls and OR = 0.46, 95% CI [0.27-0.79] for boys). Team sport participation was associated with reduced odds of psychological distress in senior high school girls.

1  
2  
3 **Conclusion:** A high PA level was favorably associated with various dimensions of mental health,  
4 especially for adolescents in senior high school. Team sport participation may have a positive  
5 impact on mental health and should therefore be encouraged.  
6  
7  
8  
9

### 10 11 12 13 14 **Strengths and limitations of this study**

- 15 • Large population-based sample of adolescents with a high participation rate.
  - 16 • Comprehensive information about sport participation and validated measures of mental  
17 health across adolescent age groups.
  - 18 • Stratified analysis that takes potential age and gender differences during adolescence into  
19 account, and adjustments for possible confounders including exposure to interpersonal  
20 violence (physical violence, bullying, sexual abuse).
  - 21 • The main limitation of this study is the cross-sectional study design.
  - 22 • Measures of PA were self-reported.
- 23  
24  
25  
26  
27  
28  
29  
30  
31  
32  
33  
34  
35  
36  
37  
38  
39  
40  
41  
42  
43  
44  
45  
46  
47  
48  
49  
50  
51  
52  
53  
54  
55  
56  
57  
58  
59  
60

## Introduction

Physical activity (PA) and psychological well-being are essential to healthy development and quality of life in adolescence<sup>1-3</sup>. Health behaviours, including the habit of engaging in regular PA, are often established during this period<sup>4,5</sup>, paving the way for long-term health prospects.

Maintenance of PA throughout adolescence is of major importance in a public health perspective. Engaging in PA and sports during adolescence is associated with the development of lifelong PA<sup>6-8</sup> and psychological well-being<sup>1,9</sup>. Yet adolescents tend to be less physically active with increasing age<sup>10</sup>. The most dramatic decrease in PA is found to occur between the ages of 15 and 16, around the transition from junior to senior high school<sup>11</sup>. Although few adolescents are satisfying the recommended 60 minutes of moderate to vigorous PA per day worldwide<sup>12,13</sup>, sport participation is found to be high in some population-based studies<sup>6,14</sup>. However, information about participation rates in various type of sports throughout adolescence is lacking.

Mental health problems are another major challenge among adolescents; currently the leading cause of health-related disability within this age group, affecting up to 20% of adolescents worldwide<sup>15,16</sup>. Prevalence rates of psychological distress, such as anxiety and depression, increase with age, especially from the mid-teens (14-16 years)<sup>11,17</sup>. Poor mental health also tends to carry over into adulthood<sup>17,18</sup>, highlighting the importance of preventive efforts during adolescence. Currently the evidence indicates that PA may have a positive impact on anxiety, depression and self-esteem among adolescents, although our knowledge is limited<sup>1</sup>. Studies commonly assess these relationships without considering different developmental stages during adolescence. Further, the need for PA measures which account for various types of sports/activities has been emphasized<sup>1</sup>. No large population-based studies have evaluated PA levels and type of sport participation in relation to mental health among girls and boys in different adolescent age groups. Identification of these relationships could have implications for preventive

1  
2  
3 programs and may contribute to more accurate strategies for increasing engagement in PA and  
4  
5 improving mental health among adolescents.  
6

7  
8 The aim of this study was to describe PA levels and the frequency of sport participation in  
9  
10 a large population-based sample of adolescents stratified by age group and gender. Further, to  
11  
12 explore associations between PA level, type of sport participation, and mental health, including  
13  
14 psychological distress, self-esteem, and life satisfaction. Based on our knowledge and the  
15  
16 literature, we anticipated that the associations between PA, sport participation and mental health  
17  
18 measures would differ between boys and girls across adolescence. We hypothesised that a high  
19  
20 level of PA and participation in sports would be associated with lower levels of psychological  
21  
22 distress, higher self-esteem and greater life satisfaction, particularly among high school students  
23  
24 and participants in team sports.  
25  
26  
27  
28  
29  
30  
31

## 32 **Methods**

### 33 *Study sample*

34  
35 From 2006-2008 all adolescent residents (age 13-19 years) of the Nord-Trøndelag county in  
36  
37 Norway (N=10464) were invited to participate in the third wave of the population-based Nord-  
38  
39 Trøndelag Health Study (Young-HUNT3). The attendees completed a comprehensive health-  
40  
41 related questionnaire during school hours. Of those invited, 7716 (74%) adolescents responded to  
42  
43 the questionnaire and attended a clinical examination. The response rate was 82% among junior  
44  
45 high school students and 69% among senior high school students. Participants not enrolled in  
46  
47 school (N=84) and participants  $\geq 20$  years of age (N=13) were excluded from the analyses in this  
48  
49 study. Thus, the study sample comprised 7619 participants (73%) (Appendix), of whom 4615  
50  
51 (61%) went to junior high school. All participants in senior high school were  $\geq 16$  years old.  
52  
53  
54  
55  
56  
57  
58  
59  
60

### *Exposure variables*

Leisure time PA level was assessed by a validated question on frequency of PA from the World Health Organization Health Behavior in Schoolchildren (WHO HBSC) Survey Questionnaire <sup>19</sup> <sup>20</sup>: Outside school hours: “How often do you usually exercise in your free time so much that you get out of breath or sweat?”. The level of intensity during exercise where you breathe heavily and/or sweat refers to moderate to vigorous activity. Response alternatives were: every day, 4-6 days/week, 2-3 days/week, 1 day/week, less than every week, less than every month, and never. Responses were categorized into three levels of PA: “Low PA” ( $\leq 1$  days/week) (reference group), “moderate PA” (2-3 days/week), and “high PA” ( $\geq 4$  days/week).

Type and frequency of sport participation was assessed by the question: “How often have you participated in the following activities/sports in the last 12 months?”; endurance sports (e.g. cross-country skiing, swimming, running), team sports (e.g. soccer, volleyball, handball), strength sports (e.g. weightlifting, bodybuilding), technical sports (e.g. track and field, alpine skiing, snowboard), aesthetic sports (e.g. dance, gymnastics), martial arts (e.g. judo, karate, boxing), extreme sports (e.g. rafting, rock climbing, paragliding), jogging/walking, and other. Jogging/walking was not defined as an organized sport, and responses to this variable were not included as part of the sport participation exposure. Four alternatives were given for describing the frequency of participation in each of the sport categories: never, less than once a week, once a week, several times a week. A frequency of “at least once a week” was defined as active participation. Furthermore, adolescents were classified by their participation in sports into team sports (e.g. soccer, volleyball, handball) or individual sports (all other sports). The reference group consisted of those with no or infrequent participation in all the sport categories, as well as those who reported a low level of PA. The groups were mutually exclusive.

### *Outcome variables - Mental health*

Psychological distress was assessed using a validated short version of the Hopkins Symptom Check List (SCL-5)<sup>21 22</sup>, including the phrases: “During the last 14 days: I have been constantly afraid and anxious; I have felt tense or uneasy; I have felt hopeless about the future; I have felt dejected or sad; I have worried too much about various things”. Responses were scored according to four response alternatives ranging from “not at all bothered” (1) to “extremely bothered” (4). A mean score was calculated, and a cut-off for symptoms of anxiety and depression was set at a mean score above two<sup>21</sup>. The five-item version (SCL-5) has shown high correlation with the 25-item SCL-25 ( $r = 0.92$ )<sup>22</sup> and good internal consistency (Cronbach’s alpha 0.87)<sup>21</sup>.

Self-esteem/feelings of self-worth was measured using a short version of the Rosenberg Self-Esteem Scale (RSES) (original 10 items)<sup>23</sup>, including four statements: “I have a positive attitude toward myself”, “I feel rather useless at times”, “I feel that I don’t have much to be proud of”, and “I feel that I am a valuable person, at least equal to other people”. Response alternatives were measured on a 4-point scale ranging from “I strongly agree” (1) to “I strongly disagree” (4). For the first and last items the scores were inverted. A mean score was calculated (range 4-16), with higher scores indicating higher levels of self-esteem. A cut-off was set at a mean score of 10 (midpoint of the scale) to separate low and high self-esteem, corresponding to the recommended cut-off at 25 on the original 10-item RSES scale (range 10-40)<sup>24</sup>. The four-item version of the RSES is found to correlate at 0.95 with the full scale and to explain 90% of the full-scale variance, and has good internal consistency (Cronbach’s alpha 0.80)<sup>25</sup>.

Life satisfaction was measured with the question: “Thinking about your life at the moment, would you say that you by and large are satisfied with life, or are you mostly dissatisfied?” Response alternatives were measured on a 7-point scale ranging from “very satisfied” (1) to “very dissatisfied” (7), and were coded into a dichotomous outcome variable where adolescents who responded 1-3 were classified as “high life satisfaction”, and those who

1  
2  
3 responded 4-7 were classified as “low life satisfaction”. A single-item life satisfaction measure is  
4  
5 shown to perform almost as well as the multiple-item Satisfaction with Life Scale (SWLS) <sup>26 27</sup>.  
6  
7  
8  
9

### 10 *Potential confounders*

11  
12 Data on gender and age were obtained from the Norwegian National Population Registry.  
13  
14 Socioeconomic status was based on participants’ reports of perceived family economy. Pubertal  
15  
16 development was assessed by self-reported pubertal status using the validated Pubertal  
17  
18 Development Scale (PDS) <sup>28</sup>. Participants were asked to rate their own growth and to assess pubic  
19  
20 hair growth. Further, boys were asked to assess changes in voice and facial hair growth, while  
21  
22 girls were asked about age at menarche and breast development. Pubertal changes were reported  
23  
24 on scales ranging from 1 (has not begun) to 4 (development completed). Menarche was  
25  
26 dichotomized into yes (coded 4) and no (coded 1). The items were summed up and an average  
27  
28 PDS score was calculated.  
29  
30  
31  
32

33 Exposure to interpersonal violence was assessed with questions derived from The  
34  
35 University of California at Los Angeles Post-traumatic Stress Disorder Reaction Index (UCLA  
36  
37 PTSD Reaction Index) <sup>29</sup>: “Have you ever experienced any of these events?” (no or yes): 1) Been  
38  
39 subjected to violence (beaten or injured), 2) Been subjected to unpleasant/disagreeable sexual  
40  
41 acts by someone approximately your own age, 3) Been subjected to unpleasant/disagreeable  
42  
43 sexual acts by an adult, and 4) Been threatened or physically harassed by fellow students at  
44  
45 school over a period of time. Responses were categorized as “prior violence”, “prior sexual  
46  
47 abuse” (by peer or adult), and “prior bullying” <sup>30</sup>.  
48  
49  
50  
51  
52  
53  
54  
55  
56  
57  
58  
59  
60

### *Statistical analyses*

Categorical variables were described with counts and percentages, and continuous variables with mean and standard deviation (SD). Possible associations between gender and age distribution were assessed with Chi-square tests.

The associations between 1) PA level and 2) type of sport participation and the mental health outcomes were evaluated using multiple logistic regression models. The results are expressed as odds ratios (OR) with 95% confidence intervals (CI). Analyses were stratified by gender and school level (junior and senior high school). To adjust for potential confounding, age, puberty development (PDS), socio-economic status, prior violence, sexual abuse (by peer or adult), and bullying were all included in the multiple models. All tests were two-sided, and the significance level was set to 5%. Analyses were performed using SPSS version 25 (SPSS Inc., Chicago, IL).

Due to missing data on pubertal development (PDS score) (13% in girls, 15% in boys), a model-based imputation for this variable was performed. Linear regression models stratified by gender were fitted with age and body mass index (BMI). Residuals for both models followed standard normal distribution and the model fit was very good. The missing values were replaced with the predicted values. The predicted variables and the original variables for both genders were highly correlated,  $r=0.75$  and  $r=0.85$  for boys and girls, respectively.

### *Ethics*

The current study has been approved by the Regional Committee for Medical Research Ethics (2014/1228/REK Sør-Øst A). The Young-HUNT Studies have been approved by REK and the Data Inspectorate of Norway. Participation in the study was voluntary. Inclusion in Young-



1  
2  
3 HUNT was based on written consent from participants 16 years of age or older, and from the  
4  
5 parents of those under 16 years of age, in accordance with Norwegian law.  
6  
7  
8  
9

### 10 *Patient and Public Involvement*

11  
12 When preparing for the Young-HUNT3 survey, the HUNT research centre appointed reference  
13  
14 groups consisting of student representatives (13-19 years), as well as representatives from the  
15  
16 county school authorities and county doctors. Content of the questionnaires, clinical examination,  
17  
18 implementation of results and protection of privacy have been discussed with these  
19  
20 representatives. Results from the current study have been presented and discussed with the Youth  
21  
22 Panel for Research at the Research and Communication Unit for Musculoskeletal Health  
23  
24 (FORMI), Oslo University Hospital. The HUNT research centre has an active information policy  
25  
26 and publishes annual newsletters for participants as well as regular reports on the HUNT web-site  
27  
28 (<https://www.ntnu.no/hunt/om>).  
29  
30  
31  
32  
33  
34  
35  
36  
37  
38  
39  
40  
41  
42  
43  
44  
45  
46  
47  
48  
49  
50  
51  
52  
53  
54  
55  
56  
57  
58  
59  
60

## Results

### *Characteristics of the study sample*

In total, 3785 boys and 3834 girls were included in the analyses. Characteristics of the study sample are summarized in Table 1. The mean age was 15.8 years (SD 1.7). About 10% reported living in families with an economy below average, and reports of exposure to interpersonal violence was higher among senior as compared to junior high school students, with physical violence being more common in boys, sexual violence more common in girls, and bullying more evenly distributed between the sexes. Girls reported more mental health problems than boys, with the highest levels of psychological distress found among girls in high school (Table 1).

**Table 1** Characteristics of the study sample (n =7619)

| Characteristics                             | Girls (%)               |                         | Boys (%)                |                         |
|---------------------------------------------|-------------------------|-------------------------|-------------------------|-------------------------|
|                                             | Junior high<br>N = 2298 | Senior high<br>N = 1536 | Junior high<br>N = 2317 | Senior high<br>N = 1468 |
| Age, mean (SD)                              | 14.6 (0.89)             | 17.6 (0.86)             | 14.6 (0.89)             | 17.5 (0.84)             |
| Socioeconomic status; family economy, n (%) |                         |                         |                         |                         |
| Above average                               | 297 (12.9)              | 264 (17.2)              | 402 (17.4)              | 319 (21.7)              |
| Average                                     | 1644 (71.5)             | 1077 (70.1)             | 1521 (65.6)             | 939 (64.0)              |
| Below average                               | 204 (8.9)               | 144 (9.4)               | 141 (6.1)               | 136 (9.3)               |
| Missing                                     | 153 (6.7)               | 253 (10.9)              | 253 (10.9)              | 74 (5.0)                |
| Puberty (PDS score), mean (SD)              | 2.90 (0.68)             | 3.49 (0.51)             | 2.56 (0.61)             | 3.34 (0.47)             |
| Missing                                     | 10 (0.4)                | 5 (0.3)                 | -                       | 1 (0.0)                 |
| Interpersonal violence, n (%)               |                         |                         |                         |                         |
| Physical violence                           | 122 (5.3)               | 138 (9.0)               | 200 (8.6)               | 246 (16.8)              |
| Missing                                     | 96 (4.2)                | 34 (2.2)                | 167 (7.2)               | 65 (4.4)                |
| Sexual abuse                                | 123 (5.4)               | 169 (11.0)              | 50 (2.2)                | 44 (3.0)                |
| Missing                                     | 103 (4.5)               | 32 (2.1)                | 170 (7.3)               | 58 (4.0)                |
| Bullying                                    | 140 (6.1)               | 129 (8.4)               | 183 (7.9)               | 117 (8.0)               |
| Missing                                     | 107 (4.7)               | 32 (2.1)                | 170 (7.3)               | 58 (4.0)                |
| Mental health outcomes                      |                         |                         |                         |                         |
| Psychological distress (SCL5)*, n (%)       |                         |                         |                         |                         |
| SCL5 ≥2                                     | 350 (15.2)              | 362 (23.6)              | 111 (4.8)               | 110 (7.5)               |
| SCL5 <2                                     | 1892 (82.3)             | 1138 (74.1)             | 2093 (90.3)             | 1302 (88.7)             |
| Missing                                     | 56 (2.4)                | 36 (2.3)                | 113 (4.9)               | 56 (3.8)                |
| Self-esteem (RSE)†, n (%)                   |                         |                         |                         |                         |
| RSE <10                                     | 660 (28.7)              | 442 (28.8)              | 304 (13.1)              | 192 (13.1)              |
| RSE ≥10                                     | 1499 (65.2)             | 1029 (67.0)             | 1847 (79.7)             | 1199 (81.7)             |
| Missing                                     | 139 (6.0)               | 65 (4.2)                | 166 (7.2)               | 77 (5.2)                |
| Life satisfaction, n (%)                    |                         |                         |                         |                         |
| Low life satisfaction                       | 722 (31.4)              | 469 (30.5)              | 373 (16.1)              | 223 (15.2)              |
| High life satisfaction                      | 1525 (66.4)             | 1050 (68.4)             | 1872 (80.8)             | 1212 (82.6)             |
| Missing                                     | 51 (2.2)                | 17 (1.1)                | 72 (3.1)                | 33 (2.2)                |

PDS = Pubertal Development Scale

\* Range 1-4, †Range 4-16

### ***PA level and sport participation***

More boys reported a high level of PA (45.2%) compared to girls (35.4%) ( $p < .001$ ). For both genders, junior high school students reported significantly higher levels of PA than senior high school students (Table 2). Of the various sports, team sports were most commonly reported by both girls and boys, with almost two thirds of the adolescents participating in such sports at least once a week (Table 2). For both genders, participation in team and technical sports was less common among senior high school students as compared to junior high school students ( $p < .001$ ). In contrast, a significantly higher proportion of both girls and boys in senior high school were engaged in strength sports compared to those in junior high school. Significantly, more girls than boys participated in aesthetic sports, while a higher proportion of boys participated in strength sports and extreme sports, in both age groups (Table 2).

**Table 2** Physical activity (PA) level and sport participation rates in relation to gender and school level

|                                          | Girls (%)   |             |                   | Boys (%)    |             |                   |
|------------------------------------------|-------------|-------------|-------------------|-------------|-------------|-------------------|
|                                          | Junior high | Senior high | <i>p</i> -value   | Junior high | Senior high | <i>p</i> -value   |
| <b>PA level</b>                          |             |             |                   |             |             |                   |
| High PA                                  | 38.4        | 32.4        |                   | 46.5        | 43.8        |                   |
| Moderate PA                              | 39.9        | 34.3        |                   | 33.1        | 28.0        |                   |
| Low PA                                   | 20.2        | 31.6        | <b>&lt;0.001*</b> | 18.5        | 27.2        | <b>&lt;0.001*</b> |
| Missing                                  | 1.5         | 1.6         |                   | 1.9         | 1.0         |                   |
| <b>Sport participation (≥1 day/week)</b> |             |             |                   |             |             |                   |
| Team sports                              | <b>64.7</b> | <b>49.9</b> | <b>&lt;0.001</b>  | <b>65.8</b> | <b>56.7</b> | <b>&lt;0.001</b>  |
| Endurance sports                         | 46.0        | 45.5        | 0.63              | 51.4        | 49.4        | 0.06              |
| Aesthetic sports                         | 25.9        | 27.3        | 0.43              | 6.0         | 5.2         | 0.25              |
| Strength sports                          | <b>20.5</b> | <b>29.7</b> | <b>&lt;0.001</b>  | <b>33.8</b> | <b>47.6</b> | <b>&lt;0.001</b>  |
| Martial arts                             | 3.5         | 4.4         | 0.17              | 7.6         | 7.6         | 0.85              |
| Technical sports                         | <b>28.0</b> | <b>16.7</b> | <b>&lt;0.001</b>  | <b>26.8</b> | <b>20.8</b> | <b>&lt;0.001</b>  |
| Extreme sports                           | 1.0         | 0.8         | 0.71              | 4.6         | 4.7         | 0.99              |

Bold: statistically significant,  $p < 0.05$ , \* chi-square test for trend

Low PA =  $\leq 1$  day/week, moderate PA = 2-3 days/week, high PA =  $\geq 4$  days/week).

### ***PA and mental health***

A high level of PA, compared to a low level of PA, was significantly associated with reduced odds of low self-esteem and low life satisfaction among all students (Table 3). In senior high school students, a high level of PA was significantly associated with reduced odds of psychological distress (OR = 0.63, 95% CI [0.46-0.86] for girls and OR = 0.46, 95% CI [0.27-0.79] for boys).

### ***Sport participation and mental health***

Participation in team sports, compared with no/infrequent sport participation, was significantly associated with reduced odds of low self-esteem for girls, both in junior high school (OR = 0.45, 95% [0.32-0.64]) and senior high school (OR = 0.57, 95% CI [0.39-0.84]). A similar non-significant trend was observed in boys (Table 4). Participation in individual sports was significantly associated with reduced odds of low self-esteem among senior high school boys (OR = 0.37, 95% CI [0.18-0.76]).

Participation in team sports was associated with reduced odds of low life satisfaction, among all girls and among junior high school boys (Table 4). Among girls in senior high school, team sport participation was also significantly associated with reduced odds of psychological distress (OR = 0.70, 95% CI [0.49 – 1.00]). In boys and junior high school girls, no statistically significant associations between sport participation and psychological distress were revealed in the adjusted models (Table 4).

**Table 3** Associations between levels of physical activity and mental health problems (psychological distress, low self-esteem, and low life satisfaction) among girls and boys in junior and senior high school.

| Physical activity (PA) level                                 | Outcome                                     |                           |                           |                           |
|--------------------------------------------------------------|---------------------------------------------|---------------------------|---------------------------|---------------------------|
|                                                              | OR (OR, 95% CI) for psychological distress* |                           |                           |                           |
|                                                              | Junior high school                          |                           | Senior high school        |                           |
|                                                              | Unadjusted                                  | Adjusted <sup>a</sup>     | Unadjusted                | Adjusted <sup>a</sup>     |
| <b>Girls</b>                                                 |                                             |                           |                           |                           |
| Low PA                                                       | 1.0 (Reference)                             | 1.0 (Reference)           | 1.0 (Reference)           | 1.0 (Reference)           |
| Moderate PA (2-3 d/w)                                        | 0.80 (0.59 – 1.07)                          | 0.86 (0.62 – 1.21)        | <b>0.68 (0.51 – 0.90)</b> | <b>0.73 (0.54 – 0.99)</b> |
| High PA (≥4 d/w)                                             | <b>0.67 (0.49 – 0.91)</b>                   | 0.88 (0.63 – 1.24)        | <b>0.53 (0.39 – 0.72)</b> | <b>0.63 (0.46 – 0.86)</b> |
| <b>Boys</b>                                                  |                                             |                           |                           |                           |
| Low PA                                                       | 1.0 (Reference)                             | 1.0 (Reference)           | 1.0 (Reference)           | 1.0 (Reference)           |
| Moderate PA (2-3 d/w)                                        | <b>0.54 (0.32 – 0.90)</b>                   | <b>0.56 (0.31 – 0.99)</b> | 0.78 (0.49 – 1.23)        | 0.89 (0.53 – 1.49)        |
| High PA (≥4 d/w)                                             | <b>0.58 (0.56 – 0.91)</b>                   | 0.70 (0.41 – 1.18)        | <b>0.38 (0.23 – 0.62)</b> | <b>0.46 (0.27 – 0.79)</b> |
| <b>OR (OR, 95% CI) for low self-esteem (RSE)<sup>†</sup></b> |                                             |                           |                           |                           |
| <b>Girls</b>                                                 |                                             |                           |                           |                           |
| Low PA                                                       | 1.0 (Reference)                             | 1.0 (Reference)           | 1.0 (Reference)           | 1.0 (Reference)           |
| Moderate PA (2-3 d/w)                                        | <b>0.63 (0.48 – 0.82)</b>                   | <b>0.65 (0.49 – 0.87)</b> | <b>0.68 (0.30 – 0.93)</b> | <b>0.72 (0.52 – 0.99)</b> |
| High PA (≥4 d/w)                                             | <b>0.53 (0.40 – 0.70)</b>                   | <b>0.59 (0.44 – 0.80)</b> | <b>0.43 (0.31 – 0.61)</b> | <b>0.49 (0.34 – 0.70)</b> |
| <b>Boys</b>                                                  |                                             |                           |                           |                           |
| Low PA                                                       | 1.0 (Reference)                             | 1.0 (Reference)           | 1.0 (Reference)           | 1.0 (Reference)           |
| Moderate PA (2-3 d/w)                                        | <b>0.37 (0.24 – 0.58)</b>                   | <b>0.32 (0.20 – 0.53)</b> | 0.66 (0.38 – 1.15)        | 0.67 (0.37 – 1.20)        |
| High PA (≥4 d/w)                                             | <b>0.31 (0.20 – 0.48)</b>                   | <b>0.33 (0.21 – 0.52)</b> | <b>0.41 (0.24 – 0.71)</b> | <b>0.44 (0.25 – 0.79)</b> |
| <b>OR (OR, 95% CI) for low life satisfaction</b>             |                                             |                           |                           |                           |
| <b>Girls</b>                                                 |                                             |                           |                           |                           |
| Low PA                                                       | 1.0 (Reference)                             | 1.0 (Reference)           | 1.0 (Reference)           | 1.0 (Reference)           |
| Moderate PA (2-3 d/w)                                        | <b>0.60 (0.48 – 0.76)</b>                   | <b>0.59 (0.45 – 0.76)</b> | <b>0.66 (0.51 – 0.85)</b> | <b>0.68 (0.52 – 0.89)</b> |
| High PA (≥4 d/w)                                             | <b>0.43 (0.34 – 0.55)</b>                   | <b>0.49 (0.37 – 0.63)</b> | <b>0.45 (0.34 – 0.59)</b> | <b>0.51 (0.38 – 0.69)</b> |
| <b>Boys</b>                                                  |                                             |                           |                           |                           |
| Low PA                                                       | 1.0 (Reference)                             | 1.0 (Reference)           | 1.0 (Reference)           | 1.0 (Reference)           |
| Moderate PA (2-3 d/w)                                        | <b>0.67 (0.51 – 0.90)</b>                   | <b>0.65 (0.47 – 0.90)</b> | 0.76 (0.53 – 1.08)        | 0.73 (0.50 – 1.08)        |
| High PA (≥4 d/w)                                             | <b>0.42 (0.32 – 0.56)</b>                   | <b>0.44 (0.32 – 0.60)</b> | <b>0.44 (0.31 – 0.62)</b> | <b>0.43 (0.30 – 0.63)</b> |

OR = odds ratio, CI = confidence interval, Bold: statistically significant associations,  $p < 0.05$ .

\* SCL5  $\geq 2$  (range 0-4),  $\dagger$  RSE  $< 10$  (range 4-16)

<sup>a</sup> Adjusted for age, puberty score (PDS), socioeconomic status, prior physical violence, prior bullying, prior sexual abuse

**Table 4** Associations between sport participation and mental health problems (psychological distress, low self-esteem, and low life satisfaction) among girls and boys in junior and senior high school.

| Sport participation                                    | Outcome                                     |                           |                           |                           |
|--------------------------------------------------------|---------------------------------------------|---------------------------|---------------------------|---------------------------|
|                                                        | OR (OR, 95% CI) for psychological distress* |                           |                           |                           |
|                                                        | Junior high school                          |                           | Senior high school        |                           |
|                                                        | Unadjusted                                  | Adjusted <sup>a</sup>     | Unadjusted                | Adjusted <sup>a</sup>     |
| <b>Girls</b>                                           |                                             |                           |                           |                           |
| No sport                                               | 1.0 (Reference)                             | 1.0 (Reference)           | 1.0 (Reference)           | 1.0 (Reference)           |
| Individual sports                                      | 1.06 (0.70 – 1.60)                          | 1.09 (0.68 – 1.73)        | 0.87 (0.61 – 1.22)        | 0.93 (0.64 – 1.35)        |
| Team sports                                            | 0.78 (0.53 – 1.14)                          | 1.02 (0.66 – 1.56)        | <b>0.56 (0.40 – 0.78)</b> | <b>0.70 (0.49 – 1.00)</b> |
| <b>Boys</b>                                            |                                             |                           |                           |                           |
| No sport                                               | 1.0 (Reference)                             | 1.0 (Reference)           | 1.0 (Reference)           | 1.0 (Reference)           |
| Individual sports                                      | 1.04 (0.56 – 1.95)                          | 1.04 (0.52 – 2.09)        | 0.85 (0.49 – 1.49)        | 0.98 (0.51 – 1.88)        |
| Team sports                                            | <b>0.55 (0.31 – 0.99)</b>                   | 0.60 (0.31 – 1.15)        | <b>0.57 (0.34 – 0.96)</b> | 0.93 (0.50 – 1.70)        |
| <b>OR (OR, 95% CI) for low self-esteem<sup>†</sup></b> |                                             |                           |                           |                           |
| <b>Girls</b>                                           |                                             |                           |                           |                           |
| No sport                                               | 1.0 (Reference)                             | 1.0 (Reference)           | 1.0 (Reference)           | 1.0 (Reference)           |
| Individual sports                                      | <b>0.52 (0.37 – 0.75)</b>                   | <b>0.55 (0.37 – 0.81)</b> | 0.77 (0.53 – 1.11)        | 0.81 (0.55 – 1.20)        |
| Team sports                                            | <b>0.42 (0.30 – 0.57)</b>                   | <b>0.45 (0.32 – 0.64)</b> | <b>0.50 (0.35 – 0.71)</b> | <b>0.57 (0.39 – 0.84)</b> |
| <b>Boys</b>                                            |                                             |                           |                           |                           |
| No sport                                               | 1.0 (Reference)                             | 1.0 (Reference)           | 1.0 (Reference)           | 1.0 (Reference)           |
| Individual sports                                      | 1.11 (0.62 – 1.99)                          | 1.43 (0.73 – 2.79)        | <b>0.42 (0.22 – 0.82)</b> | <b>0.37 (0.18 – 0.76)</b> |
| Team sports                                            | <b>0.53 (0.30 – 0.92)</b>                   | 0.72 (0.38 – 1.36)        | <b>0.47 (0.27 – 0.81)</b> | 0.57 (0.32 – 1.03)        |
| <b>OR (OR, 95% CI) for low life satisfaction</b>       |                                             |                           |                           |                           |
| <b>Girls</b>                                           |                                             |                           |                           |                           |
| No sport                                               | 1.0 (Reference)                             | 1.0 (Reference)           | 1.0 (Reference)           | 1.0 (Reference)           |
| Individual sports                                      | <b>0.70 (0.51 – 0.96)</b>                   | 0.71 (0.50 – 1.00)        | <b>0.66 (0.48 – 0.91)</b> | <b>0.65 (0.46 – 0.91)</b> |
| Team sports                                            | <b>0.46 (0.34 – 0.61)</b>                   | <b>0.51 (0.37 – 0.70)</b> | <b>0.48 (0.36 – 0.65)</b> | <b>0.55 (0.40 – 0.76)</b> |
| <b>Boys</b>                                            |                                             |                           |                           |                           |
| No sport                                               | 1.0 (Reference)                             | 1.0 (Reference)           | 1.0 (Reference)           | 1.0 (Reference)           |
| Individual sports                                      | 1.00 (0.68 – 1.46)                          | 0.99 (0.65 – 1.52)        | 0.84 (0.55 – 1.29)        | 0.80 (0.50 – 1.28)        |
| Team sports                                            | <b>0.56 (0.39 – 0.79)</b>                   | <b>0.63 (0.43 – 0.93)</b> | <b>0.62 (0.42 – 0.92)</b> | 0.72 (0.47 – 1.12)        |

OR = odds ratio, CI = confidence interval, Bold: statistically significant associations,  $p < 0.05$ .

\*  $SCL5 \geq 2$  (range 0-4), <sup>†</sup>  $RSE < 10$  (range 4-16)

<sup>a</sup> Adjusted for age, puberty score (PDS), socioeconomic status, prior physical violence, prior bullying, prior sexual abuse



## Discussion

In this population-based sample of adolescents, PA levels and participation rates in sports were lower among girls, and lower among senior high school students compared to junior high school students. Our results showed that higher levels of PA were favourably associated with self-esteem and life satisfaction throughout adolescence, as well as with reduced likelihood of psychological distress in senior high school students. Further, team sport participation was associated with mental health benefits, especially for girls.

### Strengths and limitations

The main strengths of our study include the large sample size of adolescents from an unselected general population, a high participation rate (73%), and the information including frequency of participation in sports. To our knowledge, such comprehensive information about sport participation in relation to gender and age differences has not previously been presented. This information enabled us to examine the relationship between sport participation and mental health outcomes, including the aspect of various types of sports, in contrast to most studies on this topic which mainly focus on general PA. We used validated measures of mental health outcomes. Another strength is that we were able to adjust for a variety of possible confounders, as well as including exposures to interpersonal violence as these exposures may have an impact on both PA behaviours and mental health<sup>31-33</sup>.

The main limitation of this study is the cross-sectional study design, and the resultant inability to demonstrate the direction of the association. Further, as measures were self-reported, the included variables are susceptible to information bias. We have used a single item measure to assess PA, and the variable used to describe sport participation exposure provides a crude measure of frequency of participation. However, the WHO HBSC question of PA used in this

1  
2  
3 study has been found to hold acceptable reliability and validity in adolescent samples <sup>19 20</sup>. It  
4  
5 should be noted that a proportion of the “High PA” group in this study may not fulfil the  
6  
7 recommended levels of daily PA according to the WHO guidelines <sup>34</sup>, as this group includes all  
8  
9 those who played sports or exercised at least 4 days/week. Measures of psychological distress  
10  
11 (SCL-5) and self-esteem (RSES) were shortened versions of the original instruments, however,  
12  
13 the measurement precision of these versions is found to be high and sufficient for use in  
14  
15 population-based studies <sup>21 22 25</sup>. Furthermore, dichotomization of the mental health outcomes  
16  
17 makes them prone to misclassification. However, the cut-off values to distinguish those with high  
18  
19 vs low degree of psychological distress (SCL-5) and low self-esteem (RSES) have both been  
20  
21 shown to be clinically relevant cut-points <sup>21 24</sup>. In contrast to psychological distress, low self-  
22  
23 esteem and low life satisfaction were not more prevalent in the older age group, reflecting the  
24  
25 measurement of different phenomena. Psychological distress is found to function as a proxy  
26  
27 measure of symptoms of anxiety and depression <sup>21 22</sup>, while self-esteem and life satisfaction are  
28  
29 more closely related to subjective well-being <sup>26 35</sup> which may be more stable traits.  
30  
31  
32  
33  
34

35 Although the response rate in Young-HUNT3 was high, the lower response among senior  
36  
37 high school students compared to junior high school students may represent a selection bias. In  
38  
39 Norway, most adolescents start senior high school the year they turn 16. Differences in school  
40  
41 systems in other countries, as well as differences related to opportunities for engagement in sports  
42  
43 and the organization of various youth sports may limit the generalizability of the results from this  
44  
45 study. Norwegian society is rooted in egalitarian ideals, with "Sport for All" as a high priority and  
46  
47 policy aim <sup>36</sup>; this may be part of the reason why sport participation found in this study is high by  
48  
49 international standards. Lastly, the results of this study should be interpreted with caution due to  
50  
51 multiple testing, and replication of results is warranted.  
52  
53  
54  
55  
56  
57  
58  
59  
60

## **Our results according to previous findings, and interpretation of findings**

The findings from this study confirmed the gender differences in PA levels found in other population-based studies, with girls being less physically active than boys<sup>11-13</sup>. Also in line with reports from other studies, fewer girls were involved in sports<sup>7 13 14 37</sup>. The lower levels of PA and sport participation found among senior high school students confirms findings from previous studies reporting a decline in PA during adolescence<sup>10 11 38 39</sup>, especially between the ages of 15 and 16 years<sup>11</sup>. Drop-out from sports for adolescents at this age may be related, in part, to the difficulty of meeting the increasing demands of participation in both school and sport<sup>7 40</sup>. However, a systematic review of factors associated with drop-out from organized sports, reported that lack of enjoyment and perceptions of competence are the two most dominant factors related to drop-out from sports among adolescents<sup>40</sup>.

The current findings are in line with previous studies reporting associations between adolescents' PA and mental health, including lower likelihood of depressive symptoms<sup>1 11 13 41 42</sup>, as well as greater well-being<sup>13</sup> and higher self-esteem among those who are physically active<sup>1 42</sup>. Longitudinal studies also indicate that PA may protect against the development of depression<sup>43 44</sup>. Furthermore, PA may be a helpful intervention for adolescents struggling with depressive symptoms<sup>45 46</sup>. Regarding engagement in sports, the results of the present study are in accordance with the literature indicating a positive relationship between sport participation and mental health<sup>9 13 47-49</sup>.

The findings from this study make several contributions to the body of research on the impact of PA and sports on mental health among adolescents. Firstly, age differences were revealed in these relationships, as a high PA level was associated with reduced psychological distress in high school students only. Explanations for why PA and sport participation may be of greater importance in reducing psychological distress among older adolescents could relate to how peer support and interaction play an increasingly important role during adolescence<sup>50</sup>. Thus,

1  
2  
3 social and physical activities with peers may be particularly beneficial for older adolescents,  
4  
5 helping to distract them from depressive thoughts and to reduce the sense of isolation.  
6

7  
8 Secondly, this study shows that the potential beneficial effects related to mental health  
9  
10 vary across various types of sport. Participation in team sports, compared to no participation, was  
11  
12 more strongly related to beneficial mental health outcomes than individual sports compared to no  
13  
14 participation, especially in high school girls. Other studies have reported that organized sports  
15  
16 had a greater impact on depressive symptoms among girls than boys<sup>11</sup>, and that team sports may  
17  
18 confer mental health benefits for girls in particular<sup>13</sup>. A systematic review of the psychological  
19  
20 and social benefits of sport participation argued that team sports seem to be associated with more  
21  
22 beneficial outcomes compared to individual sports due to the social aspect of being part of a team  
23  
24  
25  
26  
27  
28  
29  
30  
31  
32  
33  
34  
35  
36  
37  
38  
39  
40  
41  
42  
43  
44  
45  
46  
47  
48  
49  
50  
51  
52  
53  
54  
55  
56  
57  
58  
59  
60  
9. In a recent study of a large representative sample of European adolescents, lower levels of  
anxiety and depression and higher levels of well-being were found among team sport participants  
13. Team sport participation during adolescence has also been shown to be associated with lower  
levels of depressive symptoms in early adulthood<sup>48 51</sup>. In line with this, our findings highlight  
that type of sport, including the social aspect of participation, should be considered when  
examining the impact of sports on mental health among adolescents.

Overall, adolescents with a high PA and team sport participation had lower odds of having  
low self-esteem than of having psychological distress. These results are in accordance with  
findings from a review study showing that, of the several mental health outcomes associated with  
PA in young people, the strongest association was with self-esteem<sup>1</sup>. It may be that experiences  
of low self-esteem occur earlier than symptoms of anxiety and depression and that low self-  
esteem may trigger poor coping behavior and risk behavior that subsequently increases the  
likelihood of mental disorders<sup>52</sup>. A Cochrane review reports that exercise interventions have  
positive short-term effects on self-esteem that may help prevent the development of  
psychological and behavioral problems<sup>53</sup>.

1  
2  
3 This study contributes to our understanding of the implications lower levels of PA may  
4 have on mental health in different phases of adolescence. Regardless of the direction of the  
5 association between PA and mental health, inactive adolescents may carry a “double health  
6 burden”, with both physical and mental health challenges. To help more adolescents increase or  
7 maintain their levels of PA, interventions could include facilitation of a wider variety of sports  
8 activities, and at different skill levels, to reach and engage more adolescents. As lack of  
9 enjoyment has previously been found to be the most dominant factor related to drop-out from  
10 sports <sup>40</sup>, increased focus on the joy of sports may be important in order to reduce drop-out rates  
11 during adolescence. In efforts to reduce mental health problems, our results suggest that girls in  
12 particular should be a target group for promotion of team sport participation.  
13  
14  
15  
16  
17  
18  
19  
20  
21  
22  
23  
24  
25  
26  
27  
28

### 29 **Conclusion and implications**

30  
31 This study identified gender and age differences in PA and sport participation across adolescent  
32 age-groups, with the lowest engagement in PA and sports found among girls in senior high  
33 school. Our results indicate that a high PA level and sport participation have a positive impact on  
34 various dimensions of mental health throughout adolescence, highlighting the importance of  
35 continuing with sports in the late teens. The findings underline a need for interventions aimed at  
36 maintaining or increasing PA and sport participation, especially for girls around the transition to  
37 senior high school. Initiatives to help adolescents continue in team sports may be particularly  
38 advantageous. Future studies should examine the effect of interventions for encouraging and  
39 increasing PA and sport participation among adolescents, as well as their potential mental health  
40 benefits.  
41  
42  
43  
44  
45  
46  
47  
48  
49  
50  
51  
52  
53  
54  
55  
56  
57  
58  
59  
60

## References

1. Biddle SJ, Asare M. Physical activity and mental health in children and adolescents: a review of reviews. *British journal of sports medicine* 2011;45:886-95. doi: 10.1136/bjsports-2011-090185
2. Hallal PC, Victora CG, Azevedo MR, et al. Adolescent physical activity and health: a systematic review. *Sports medicine (Auckland, NZ)* 2006;36:1019-30.
3. Strong WB, Malina RM, Blimkie CJ, et al. Evidence based physical activity for school-age youth. *The Journal of pediatrics* 2005;146:732-7. doi: 10.1016/j.jpeds.2005.01.055
4. Biddle SJ, Gorely T, Stensel DJ. Health-enhancing physical activity and sedentary behaviour in children and adolescents. *Journal of sports sciences* 2004;22:679-701. doi: 10.1080/02640410410001712412
5. Sawyer SM, Afifi RA, Bearinger LH, et al. Adolescence: a foundation for future health. *Lancet* 2012;379:1630-40. doi: 10.1016/s0140-6736(12)60072-5
6. Tammelin T, Nayha S, Hills AP, et al. Adolescent participation in sports and adult physical activity. *Am J Prev Med* 2003;24:22-8.
7. Kjonniksen L, Anderssen N, Wold B. Organized youth sport as a predictor of physical activity in adulthood. *Scandinavian journal of medicine & science in sports* 2009;19:646-54. doi: 10.1111/j.1600-0838.2008.00850.x
8. Belanger M, Sabiston CM, Barnett TA, et al. Number of years of participation in some, but not all, types of physical activity during adolescence predicts level of physical activity in adulthood: Results from a 13-year study. *The international journal of behavioral nutrition and physical activity* 2015;12:76. doi: 10.1186/s12966-015-0237-x
9. Eime RM, Young JA, Harvey JT, et al. A systematic review of the psychological and social benefits of participation in sport for children and adolescents: informing development of a conceptual model of health through sport. *The international journal of behavioral nutrition and physical activity* 2013;10:98. doi: 10.1186/1479-5868-10-98
10. Dumith SC, Gigante DP, Domingues MR, et al. Physical activity change during adolescence: a systematic review and a pooled analysis. *International journal of epidemiology* 2011;40:685-98. doi: 10.1093/ije/dyq272
11. Baldursdottir B, Valdimarsdottir HB, Krettek A, et al. Age-related differences in physical activity and depressive symptoms among 10–19-year-old adolescents: A population based study. *Psychology of Sport and Exercise* 2017;28:91-99. doi: 10.1016/j.psychsport.2016.10.007
12. Hallal PC, Andersen LB, Bull FC, et al. Global physical activity levels: surveillance progress, pitfalls, and prospects. *Lancet* 2012;380:247-57. doi: 10.1016/s0140-6736(12)60646-1
13. McMahon EM, Corcoran P, O'Regan G, et al. Physical activity in European adolescents and associations with anxiety, depression and well-being. *Eur Child Adolesc Psychiatry* 2017;26:111-22 doi: 10.1007/s00787-016-0875-9
14. Pate RR, Trost SG, Levin S, et al. Sports participation and health-related behaviors among US youth. *Arch Pediatr Adolesc Med* 2000;154:904-11.
15. Belfer ML. Child and adolescent mental disorders: the magnitude of the problem across the globe. *Journal of child psychology and psychiatry, and allied disciplines* 2008;49:226-36. doi: 10.1111/j.1469-7610.2007.01855.x
16. Kieling C, Baker-Henningham H, Belfer M, et al. Child and adolescent mental health worldwide: evidence for action. *Lancet* 2011;378:1515-25. doi: 10.1016/s0140-6736(11)60827-1
17. Bertha EA, Balazs J. Subthreshold depression in adolescence: a systematic review. *Eur Child Adolesc Psychiatry* 2013;22:589-603. doi: 10.1007/s00787-013-0411-0



18. Fergusson DM, Horwood LJ, Ridder EM, et al. Subthreshold depression in adolescence and mental health outcomes in adulthood. *Archives of general psychiatry* 2005;62:66-72. doi: 10.1001/archpsyc.62.1.66
19. Rangul V, Holmen TL, Kurtze N, et al. Reliability and validity of two frequently used self-administered physical activity questionnaires in adolescents. *BMC medical research methodology* 2008;8:47. doi: 10.1186/1471-2288-8-47
20. Booth ML, Okely AD, Chey T, et al. The reliability and validity of the physical activity questions in the WHO health behaviour in schoolchildren (HBSC) survey: a population study. *British journal of sports medicine* 2001;35:263-7.
21. Strand BH, Dalgard OS, Tambs K, et al. Measuring the mental health status of the Norwegian population: a comparison of the instruments SCL-25, SCL-10, SCL-5 and MHI-5 (SF-36). *Nordic journal of psychiatry* 2003;57:113-8. doi: 10.1080/08039480310000932
22. Tambs K, Moum T. How well can a few questionnaire items indicate anxiety and depression? *Acta Psychiatrica Scandinavica* 1993;87:364-67.
23. Rosenberg M. Society and the Adolescent Self-Image. Revised edition. Middletown, CT: Wesleyan University Press 1989.
24. Isomaa R, Vaananen JM, Frojd S, et al. How low is low? Low self-esteem as an indicator of internalizing psychopathology in adolescence. *Health Educ Behav* 2013;40:392-9. doi: 10.1177/1090198112445481
25. Tambs K, Roysamb E. Selection of questions to short-form versions of original psychometric instruments in MoBa. *Norsk Epidemiologi* 2014;24:195-201.
26. Cheung F, Lucas RE. Assessing the validity of single-item life satisfaction measures: results from three large samples. *Quality of life research: an international journal of quality of life aspects of treatment, care and rehabilitation* 2014;23:2809-18. doi: 10.1007/s11136-014-0726-4
27. Jovanovic V. The validity of the Satisfaction with Life Scale in adolescents and a comparison with single-item life satisfaction measures: a preliminary study. *Quality of life research : an international journal of quality of life aspects of treatment, care and rehabilitation* 2016;25:3173-80. doi: 10.1007/s11136-016-1331-5
28. Petersen AC, Crockett L, Richards M, et al. A self-report measure of pubertal status: Reliability, validity, and initial norms. *Journal of youth and adolescence* 1988;17:117-33. doi: 10.1007/bf01537962
29. Steinberg AM, Brymer MJ, Decker KB, et al. The University of California at Los Angeles Post-traumatic Stress Disorder Reaction Index. *Current psychiatry reports* 2004;6:96-100.
30. Stensland SO, Zwart JA, Wentzel-Larsen T, et al. The headache of terror: A matched cohort study of adolescents from the Utoya and the HUNT Study. *Neurology* 2018;90:e111-e18. doi: 10.1212/wnl.0000000000004805
31. Hughes K, Bellis MA, Hardcastle KA, et al. The effect of multiple adverse childhood experiences on health: a systematic review and meta-analysis. *The Lancet Public health* 2017;2:e356-e66. doi: 10.1016/s2468-2667(17)30118-4
32. Stensland SO, Thoresen S, Wentzel-Larsen T, et al. Interpersonal violence and overweight in adolescents: the HUNT Study. *Scand J Public Health* 2015;43:18-26. doi: 10.1177/1403494814556176
33. McLaughlin KA, Greif Green J, Gruber MJ, et al. Childhood adversities and first onset of psychiatric disorders in a national sample of US adolescents. *Archives of general psychiatry* 2012;69:1151-60. doi: 10.1001/archgenpsychiatry.2011.2277
34. WHO Guidelines Approved by the Guidelines Review Committee. Global Recommendations on Physical Activity for Health. Geneva: World Health Organization, 2010.

- 1
- 2
- 3 35. Du H, King RB, Chi P. Self-esteem and subjective well-being revisited: The roles of
- 4 personal, relational, and collective self-esteem. *PloS one* 2017;12:e0183958. doi:
- 5 10.1371/journal.pone.0183958
- 6
- 7 36. Skille EÅ, Säfvenbom R. Sport policy in Norway. *International Journal of Sport Policy*
- 8 2011;3:289-99. doi: 10.1080/19406940.2010.547867
- 9
- 10 37. Marques A, Ekelund U, Sardinha LB. Associations between organized sports participation
- 11 and objectively measured physical activity, sedentary time and weight status in youth.
- 12 *Journal of science and medicine in sport / Sports Medicine Australia* 2016;19:154-7. doi:
- 13 10.1016/j.jsams.2015.02.007
- 14
- 15 38. Dalene KE, Anderssen SA, Andersen LB, et al. Secular and longitudinal physical activity
- 16 changes in population-based samples of children and adolescents. *Scandinavian journal of*
- 17 *medicine & science in sports* 2018;28:161-71. doi: 10.1111/sms.12876
- 18
- 19 39. Sagatun A, Kolle E, Anderssen SA, et al. Three-year follow-up of physical activity in
- 20 Norwegian youth from two ethnic groups: associations with socio-demographic factors.
- 21 *BMC public health* 2008;8:419. doi: 10.1186/1471-2458-8-419
- 22
- 23 40. Crane J TV. A systemativ review of dropout from organized sport among childen and youth.
- 24 *European Physical Education Review* 2015;21:114-31.
- 25
- 26 41. Korczak DJ, Madigan S, Colasanto M. Children's Physical Activity and Depression: A Meta-
- 27 analysis. *Pediatrics* 2017;139. doi: 10.1542/peds.2016-2266
- 28
- 29 42. Ahn S, Fedewa AL. A meta-analysis of the relationship between children's physical activity
- 30 and mental health. *J Pediatr Psychol* 2011;36:385-97. doi: 10.1093/jpepsy/jsq107
- 31
- 32 43. Jerstad SJ, Boutelle KN, Ness KK, et al. Prospective reciprocal relations between physical
- 33 activity and depression in female adolescents. *J Consult Clin Psychol* 2010;78(2):268-72.
- 34 doi: 10.1037/a0018793 [published Online First: 2010/03/31]
- 35
- 36 44. McPhie ML, Rawana JS. The effect of physical activity on depression in adolescence and
- 37 emerging adulthood: a growth-curve analysis. *Journal of adolescence* 2015;40:83-92. doi:
- 38 10.1016/j.adolescence.2015.01.008
- 39
- 40 45. Stubbs B, Vancampfort D, Hallgren M, et al. EPA guidance on physical activity as a
- 41 treatment for severe mental illness: a meta-review of the evidence and Position Statement
- 42 from the European Psychiatric Association (EPA), supported by the International
- 43 Organization of Physical Therapists in Mental Health (IOPTMH). *European psychiatry :*
- 44 *the journal of the Association of European Psychiatrists* 2018;54:124-44. doi:
- 45 10.1016/j.eurpsy.2018.07.004
- 46
- 47 46. Bailey AP, Hetrick SE, Rosenbaum S, et al. Treating depression with physical activity in
- 48 adolescents and young adults: a systematic review and meta-analysis of randomised
- 49 controlled trials. *Psychological Medicine* 2018;48:1068-83. doi:
- 50 10.1017/S0033291717002653
- 51
- 52 47. Jewett R, Sabiston CM, Brunet J, et al. School sport participation during adolescence and
- 53 mental health in early adulthood. *The Journal of adolescent health: official publication of*
- 54 *the Society for Adolescent Medicine* 2014;55:640-4. doi:
- 55 10.1016/j.jadohealth.2014.04.018
- 56
- 57 48. Brunet J, Sabiston CM, Chaiton M, et al. The association between past and current physical
- 58 activity and depressive symptoms in young adults: a 10-year prospective study. *Ann*
- 59 *Epidemiol* 2013;23:25-30. doi: 10.1016/j.annepidem.2012.10.006
- 60
- 61 49. Evans MB, Allan V, Erickson K, et al. Are all sport activities equal? A systematic review of
- 62 how youth psychosocial experiences vary across differing sport activities. *British journal*
- 63 *of sports medicine* 2017;51:169-76. doi: 10.1136/bjsports-2016-096725
- 64
- 65 50. Christie D, Viner R. Adolescent development. *BMJ (Clinical research ed)* 2005;330:301-4.
- 66 doi: 10.1136/bmj.330.7486.301



- 1  
2  
3 51. Sabiston CM, Jewett R, Ashdown-Franks G, et al. Number of Years of Team and Individual  
4 Sport Participation During Adolescence and Depressive Symptoms in Early Adulthood. *J*  
5 *Sport Exerc Psychol* 2016;38:105-10. doi: 10.1123/jsep.2015-0175  
6  
7 52. Mann M, Hosman CM, Schaalma HP, et al. Self-esteem in a broad-spectrum approach for  
8 mental health promotion. *Health education research* 2004;19:357-72. doi:  
9 10.1093/her/cyg041  
10 53. Ekeland E, Heian F, Hagen KB, et al. Exercise to improve self-esteem in children and young  
11 people. *The Cochrane database of systematic reviews* 2004(Online):CD003683. doi:  
12 10.1002/14651858.CD003683.pub2  
13  
14  
15  
16  
17  
18  
19  
20  
21  
22  
23  
24  
25  
26  
27  
28  
29  
30  
31  
32  
33  
34  
35  
36  
37  
38  
39  
40  
41  
42  
43  
44  
45  
46  
47  
48  
49  
50  
51  
52  
53  
54  
55  
56  
57  
58  
59  
60

For peer review only

1  
2  
3 **Contributors:** MHG processed, analysed and interpreted the data and drafted the initial  
4 manuscript. SØS, KS and JAZ were involved in the conception and design of the manuscript, as  
5 well as data interpretation and critical review and revision of the manuscript. MCS supervised the  
6 statistical analyses. MSC and MBJ were involved in critical review and revision of the manuscript.  
7  
8 All authors have read and approved the final manuscript.  
9

10  
11  
12 **Acknowledgements:** We would like to thank the adolescents participating in the adolescent part  
13 of the Nord-Trøndelag Health Study (Young-HUNT3) and the HUNT research centre for their  
14 cooperation. The HUNT Study is a collaboration between HUNT Research Centre (Faculty of  
15 Medicine and Health Sciences, Norwegian University of Science and Technology NTNU), Nord-  
16 Trøndelag County Council, Central Norway Regional Health Authority, and the Norwegian  
17 Institute of Public Health. We would also like to thank the patient representatives for their  
18 contribution to this study.  
19  
20  
21  
22  
23  
24  
25  
26  
27  
28  
29

30 **Funding:** This work was funded by The Norwegian Fund for Post-Graduate Training in  
31 Physiotherapy, Grant number 61741.  
32  
33  
34

35 **Competing interests:** None declared.  
36

37 **Patient consent:** Not required.  
38

39  
40 **Ethics approval:** Inclusion was based on written consent from participants aged 16 years and  
41 older and from parents for those under 16, in accordance with Norwegian law. The current study  
42 was approved by the Regional Committee for Medical Research Ethics (REK) (2014/1228/REK  
43 Sør-Øst A). The Young-HUNT Studies have been approved by REK and the Data Inspectorate of  
44 Norway.  
45  
46  
47  
48  
49

50  
51 **Data sharing statement:** The data set analysed belongs to a third party, the Nord-Trøndelag  
52 Health Study (HUNT Study). The authors of the current manuscript have been given permission  
53 to analyse the data after obtaining the necessary Norwegian permits. Research groups that wish to  
54 analyse data from the HUNT study may apply to the HUNT organization to get access to the data  
55  
56  
57  
58  
59  
60

1  
2  
3 (<https://www.ntnu.no/hunt/datatilgang>). HUNT databank online provides a complete overview of  
4  
5 the research variables, as well as metadata (<https://hunt-db.medisin.ntnu.no/hunt->  
6  
7 [db/#/survey/YH3](https://hunt-db.medisin.ntnu.no/hunt-db/#/survey/YH3)). The general health questionnaire used in the study is accessible from the  
8  
9 HUNT Bio-And-Databank (<http://www.ntnu.edu/hunt/data/que>).  
10  
11

12 **Provenance and peer review:** Not commissioned; externally peer reviewed.  
13  
14  
15  
16  
17  
18  
19  
20  
21  
22  
23  
24  
25  
26  
27  
28  
29  
30  
31  
32  
33  
34  
35  
36  
37  
38  
39  
40  
41  
42  
43  
44  
45  
46  
47  
48  
49  
50  
51  
52  
53  
54  
55  
56  
57  
58  
59  
60

For peer review only

**Appendix.** Flow chart of the study sample.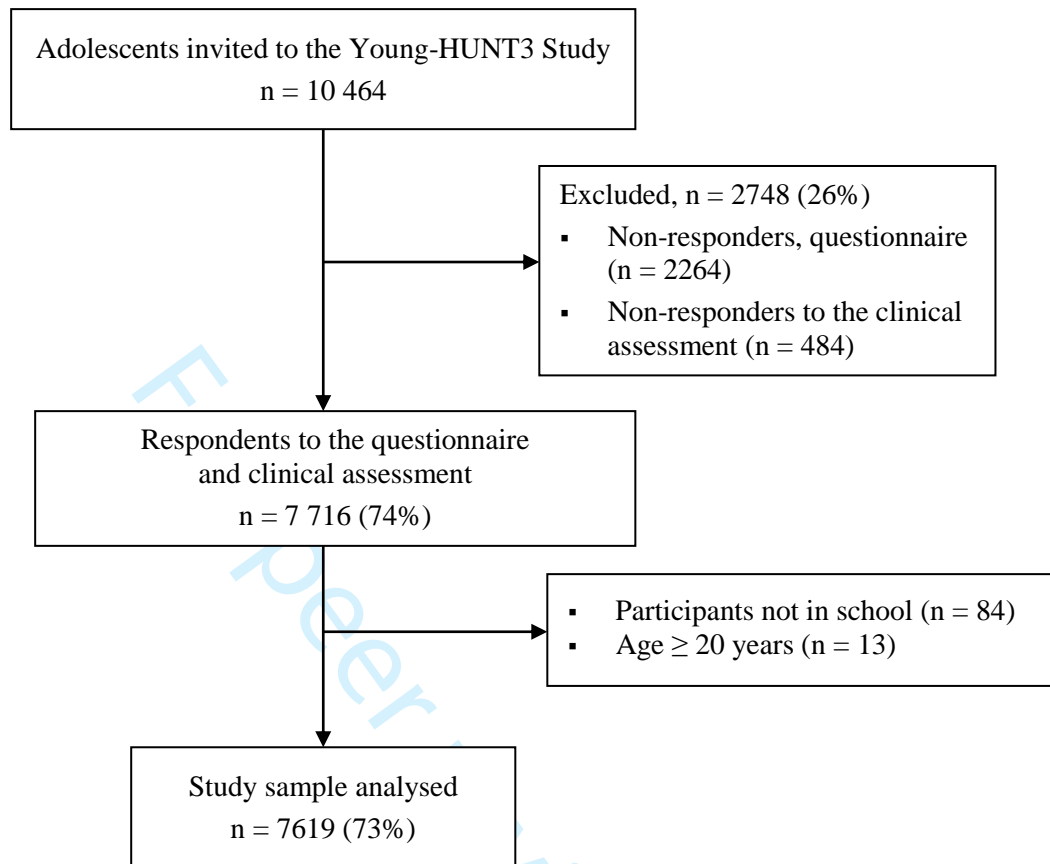

**STROBE 2007 (v4) Statement—Checklist of items that should be included in reports of *cross-sectional studies***

| Section/Topic                | Item # | Recommendation                                                                                                                                                                       | Reported on page # |
|------------------------------|--------|--------------------------------------------------------------------------------------------------------------------------------------------------------------------------------------|--------------------|
| Title and abstract           | 1      | (a) Indicate the study's design with a commonly used term in the title or the abstract                                                                                               | 1, 2               |
|                              |        | (b) Provide in the abstract an informative and balanced summary of what was done and what was found                                                                                  | 2                  |
| <b>Introduction</b>          |        |                                                                                                                                                                                      |                    |
| Background/rationale         | 2      | Explain the scientific background and rationale for the investigation being reported                                                                                                 | 4-5                |
| Objectives                   | 3      | State specific objectives, including any prespecified hypotheses                                                                                                                     | 5                  |
| <b>Methods</b>               |        |                                                                                                                                                                                      |                    |
| Study design                 | 4      | Present key elements of study design early in the paper                                                                                                                              | 2, 5               |
| Setting                      | 5      | Describe the setting, locations, and relevant dates, including periods of recruitment, exposure, follow-up, and data collection                                                      | 5                  |
| Participants                 | 6      | (a) Give the eligibility criteria, and the sources and methods of selection of participants                                                                                          | 5                  |
| Variables                    | 7      | Clearly define all outcomes, exposures, predictors, potential confounders, and effect modifiers. Give diagnostic criteria, if applicable                                             | 5-8                |
| Data sources/<br>measurement | 8*     | For each variable of interest, give sources of data and details of methods of assessment (measurement). Describe comparability of assessment methods if there is more than one group | 5-8                |
| Bias                         | 9      | Describe any efforts to address potential sources of bias                                                                                                                            | 8-9                |
| Study size                   | 10     | Explain how the study size was arrived at                                                                                                                                            | 5                  |
| Quantitative variables       | 11     | Explain how quantitative variables were handled in the analyses. If applicable, describe which groupings were chosen and why                                                         | 5-8                |
| Statistical methods          | 12     | (a) Describe all statistical methods, including those used to control for confounding                                                                                                | 8-9                |
|                              |        | (b) Describe any methods used to examine subgroups and interactions                                                                                                                  | 9                  |
|                              |        | (c) Explain how missing data were addressed                                                                                                                                          | 9                  |
|                              |        | (d) If applicable, describe analytical methods taking account of sampling strategy                                                                                                   |                    |
|                              |        | (e) Describe any sensitivity analyses                                                                                                                                                |                    |

|                          |     |                                                                                                                                                                                                              |             |
|--------------------------|-----|--------------------------------------------------------------------------------------------------------------------------------------------------------------------------------------------------------------|-------------|
| <b>Results</b>           |     |                                                                                                                                                                                                              |             |
| Participants             | 13* | (a) Report numbers of individuals at each stage of study—eg numbers potentially eligible, examined for eligibility, confirmed eligible, included in the study, completing follow-up, and analysed            | 5, 24       |
|                          |     | (b) Give reasons for non-participation at each stage                                                                                                                                                         | 5, Appendix |
|                          |     | (c) Consider use of a flow diagram                                                                                                                                                                           | Appendix    |
| Descriptive data         | 14* | (a) Give characteristics of study participants (eg demographic, clinical, social) and information on exposures and potential confounders                                                                     | 11-12       |
|                          |     | (b) Indicate number of participants with missing data for each variable of interest                                                                                                                          | 12          |
| Outcome data             | 15* | Report numbers of outcome events or summary measures                                                                                                                                                         | 13, 15      |
| Main results             | 16  | (a) Give unadjusted estimates and, if applicable, confounder-adjusted estimates and their precision (eg, 95% confidence interval). Make clear which confounders were adjusted for and why they were included | 16-17       |
|                          |     | (b) Report category boundaries when continuous variables were categorized                                                                                                                                    | 16-17       |
|                          |     | (c) If relevant, consider translating estimates of relative risk into absolute risk for a meaningful time period                                                                                             |             |
| Other analyses           | 17  | Report other analyses done—eg analyses of subgroups and interactions, and sensitivity analyses                                                                                                               |             |
| <b>Discussion</b>        |     |                                                                                                                                                                                                              |             |
| Key results              | 18  | Summarise key results with reference to study objectives                                                                                                                                                     | 18          |
| Limitations              | 19  | Discuss limitations of the study, taking into account sources of potential bias or imprecision. Discuss both direction and magnitude of any potential bias                                                   | 18-19       |
| Interpretation           | 20  | Give a cautious overall interpretation of results considering objectives, limitations, multiplicity of analyses, results from similar studies, and other relevant evidence                                   | 20-22       |
| Generalisability         | 21  | Discuss the generalisability (external validity) of the study results                                                                                                                                        | 19          |
| <b>Other information</b> |     |                                                                                                                                                                                                              |             |
| Funding                  | 22  | Give the source of funding and the role of the funders for the present study and, if applicable, for the original study on which the present article is based                                                | 27          |

\*Give information separately for cases and controls in case-control studies and, if applicable, for exposed and unexposed groups in cohort and cross-sectional studies.

**Note:** An Explanation and Elaboration article discusses each checklist item and gives methodological background and published examples of transparent reporting. The STROBE checklist is best used in conjunction with this article (freely available on the Web sites of PLoS Medicine at <http://www.plosmedicine.org/>, Annals of Internal Medicine at <http://www.annals.org/>, and Epidemiology at <http://www.epidem.com/>). Information on the STROBE Initiative is available at [www.strobe-statement.org](http://www.strobe-statement.org).

# BMJ Open

**Physical activity and sport participation among adolescents:  
associations with mental health in different age groups.  
Results from the Young-HUNT Study, a cross sectional  
survey**

|                                 |                                                                                                                                                                                                                                                                                                                                                                                                                                                                                                                                                                                                                                                                                                                                                                                                                                                                                                                                                                       |
|---------------------------------|-----------------------------------------------------------------------------------------------------------------------------------------------------------------------------------------------------------------------------------------------------------------------------------------------------------------------------------------------------------------------------------------------------------------------------------------------------------------------------------------------------------------------------------------------------------------------------------------------------------------------------------------------------------------------------------------------------------------------------------------------------------------------------------------------------------------------------------------------------------------------------------------------------------------------------------------------------------------------|
| Journal:                        | <i>BMJ Open</i>                                                                                                                                                                                                                                                                                                                                                                                                                                                                                                                                                                                                                                                                                                                                                                                                                                                                                                                                                       |
| Manuscript ID                   | bmjopen-2018-028555.R2                                                                                                                                                                                                                                                                                                                                                                                                                                                                                                                                                                                                                                                                                                                                                                                                                                                                                                                                                |
| Article Type:                   | Research                                                                                                                                                                                                                                                                                                                                                                                                                                                                                                                                                                                                                                                                                                                                                                                                                                                                                                                                                              |
| Date Submitted by the Author:   | 22-Jun-2019                                                                                                                                                                                                                                                                                                                                                                                                                                                                                                                                                                                                                                                                                                                                                                                                                                                                                                                                                           |
| Complete List of Authors:       | Guddal, Maren; Research and Communication Unit for Musculoskeletal Health (FORMI); Faculty of Medicine, Institute of Clinical Medicine, University of Oslo<br>Stensland, Synne; Research and Communication Unit for Musculoskeletal Health (FORMI); Norwegian Centre for Violence and Traumatic Stress Studies, NKVTS<br>Småstuen, Milada; Research and Communication Unit for Musculoskeletal Health (FORMI); Faculty of Health Sciences, Oslo Metropolitan University<br>Bakke Johnsen, Marianne ; Research and Communication Unit for Musculoskeletal Health (FORMI); Faculty of Medicine, Institute of Clinical Medicine, University of Oslo<br>Zwart, John-Anker; Research and Communication Unit for Musculoskeletal Health (FORMI); Faculty of Medicine, Institute of Clinical Medicine, University of Oslo<br>Storheim, Kjersti; Research and Communication Unit for Musculoskeletal Health (FORMI); Faculty of Health Sciences, Oslo Metropolitan University |
| <b>Primary Subject Heading</b>: | Epidemiology                                                                                                                                                                                                                                                                                                                                                                                                                                                                                                                                                                                                                                                                                                                                                                                                                                                                                                                                                          |
| Secondary Subject Heading:      | Epidemiology, Mental health, Public health, Sports and exercise medicine                                                                                                                                                                                                                                                                                                                                                                                                                                                                                                                                                                                                                                                                                                                                                                                                                                                                                              |
| Keywords:                       | EPIDEMIOLOGY, PUBLIC HEALTH, SPORTS MEDICINE, MENTAL HEALTH                                                                                                                                                                                                                                                                                                                                                                                                                                                                                                                                                                                                                                                                                                                                                                                                                                                                                                           |
|                                 |                                                                                                                                                                                                                                                                                                                                                                                                                                                                                                                                                                                                                                                                                                                                                                                                                                                                                                                                                                       |

SCHOLARONE™  
Manuscripts

1  
2  
3 **Physical activity and sport participation among adolescents: associations with**  
4 **mental health in different age groups. Results from the Young-HUNT Study, a cross**  
5 **sectional survey**  
6  
7  
8

9 Maren Hjelle Guddal, PT, MSc <sup>1,2\*</sup>

10 \* Corresponding author

11 Email: [m.h.guddal@studmed.uio.no](mailto:m.h.guddal@studmed.uio.no)

12 Phone number: +47 97663176

13 Postal Address:

14 FORMI, Oslo University Hospital, Ullevaal. Building 37 B

15 Post box 4956 Nydalen

16 NO-0424 Oslo

17 Norway  
18  
19  
20

21 Synne Øien Stensland, MD, PhD <sup>1,3</sup>

22 Email: [synne.stensland@nkvts.no](mailto:synne.stensland@nkvts.no)

23  
24 Milada Cvancarova Småstuen, PhD <sup>1,4</sup>

25 Email: [miladacv@medisin.uio.no](mailto:miladacv@medisin.uio.no)

26  
27  
28 Marianne Bakke Johnsen, PT, PhD <sup>1,2</sup>

29 Email: [m.b.johnsen@medisin.uio.no](mailto:m.b.johnsen@medisin.uio.no)

30  
31 John-Anker Zwart, MD, PhD <sup>1,2</sup>

32 Email: [j.a.zwart@medisin.uio.no](mailto:j.a.zwart@medisin.uio.no)

33  
34  
35 Kjersti Storheim, PT, PhD <sup>1,4</sup>

36 Email: [kjersti.storheim@medisin.uio.no](mailto:kjersti.storheim@medisin.uio.no)

37  
38 <sup>1</sup> Research and Communication Unit for Musculoskeletal Health (FORMI), Oslo University  
39 Hospital, Oslo, Norway

40 <sup>2</sup> Faculty of Medicine, Institute of Clinical Medicine, University of Oslo, Norway

41 <sup>3</sup> Norwegian Centre for Violence and Traumatic Stress Studies, Oslo, Norway

42 <sup>4</sup> Faculty of Health Sciences, Oslo Metropolitan University, Oslo, Norway  
43  
44  
45  
46  
47  
48  
49  
50  
51

52 **Manuscript word count: 4072**

53 **Abstract word count: 299**  
54  
55  
56  
57  
58  
59  
60



## Abstract

**Objectives:** Knowledge of how physical activity (PA) and sport participation are related to mental health throughout adolescence is scarce. Our objective was to describe PA levels and sport participation in a population-based sample of adolescents, and to explore how they relate to mental health in different age groups.

**Design:** A population-based cross-sectional study.

**Setting and participants:** The adolescent part of the Nord-Trøndelag Health Study (Young-HUNT3), a Norwegian population-based health survey conducted from 2006-2008. Of 10464 invited participants (age 13-19 years), 7619 (73%) participated, of whom 3785 (50%) were boys.

**Outcome measures:** Mental health outcomes included psychological distress assessed using a short version of the Hopkins Symptom Check List (SCL-5), self-esteem assessed using a short version of The Rosenberg Self-Esteem Scale (RSES) and life satisfaction assessed with a single-item satisfaction with life measure.

**Method:** Logistic regression models were used to estimate the likelihood of psychological distress, low self-esteem, and low life satisfaction, according to self-reported PA level and type of sport participation, stratified by gender and school level (junior vs senior high school).

**Results:** Fewer senior high school students participated in team sports compared to junior high school students ( $p < 0.001$ ). Physically active adolescents and participants in team sports had higher self-esteem and life satisfaction. A high PA level, compared to a low PA level, was associated with reduced odds of psychological distress among senior high school students (Odds ratio [OR] = 0.63, 95% confidence interval [CI] [0.46-0.86] for girls and OR = 0.46, 95% CI [0.27-0.79] for boys). Team sport participation was associated with reduced odds of psychological distress in senior high school girls.

1  
2  
3 **Conclusion:** A high PA level was favorably associated with various dimensions of mental health,  
4 especially for adolescents in senior high school. Team sport participation may have a positive  
5 impact on mental health and should therefore be encouraged.  
6  
7  
8  
9

### 10 11 12 13 14 **Strengths and limitations of this study**

- 15 • Large population-based sample of adolescents with a high participation rate.
  - 16 • Comprehensive information about sport participation and validated measures of mental  
17 health across adolescent age groups.
  - 18 • Stratified analysis that takes potential age and gender differences during adolescence into  
19 account, and adjustments for possible confounders including exposure to interpersonal  
20 violence (physical violence, bullying, sexual abuse).
  - 21 • The main limitation of this study is the cross-sectional study design.
  - 22 • Measures of PA were self-reported.
- 23  
24  
25  
26  
27  
28  
29  
30  
31  
32  
33  
34  
35  
36  
37  
38  
39  
40  
41  
42  
43  
44  
45  
46  
47  
48  
49  
50  
51  
52  
53  
54  
55  
56  
57  
58  
59  
60

## Introduction

Physical activity (PA) and psychological well-being are essential to healthy development and quality of life in adolescence<sup>1-3</sup>. Health behaviours, including the habit of engaging in regular PA, are often established during this period<sup>4,5</sup>, paving the way for long-term health prospects.

Maintenance of PA throughout adolescence is of major importance in a public health perspective. Engaging in PA and sports during adolescence is associated with the development of lifelong PA<sup>6-8</sup> and psychological well-being<sup>1,9</sup>. Yet adolescents tend to be less physically active with increasing age<sup>10</sup>. The most dramatic decrease in PA is found to occur between the ages of 15 and 16, around the transition from junior to senior high school<sup>11</sup>. Although few adolescents are satisfying the recommended 60 minutes of moderate to vigorous PA per day worldwide<sup>12,13</sup>, sport participation is found to be high in some population-based studies<sup>6,14</sup>. However, information about participation rates in various type of sports throughout adolescence is lacking.

Mental health problems are another major challenge among adolescents; currently the leading cause of health-related disability within this age group, affecting up to 20% of adolescents worldwide<sup>15,16</sup>. Prevalence rates of psychological distress, such as anxiety and depression, increase with age, especially from the mid-teens (14-16 years)<sup>11,17</sup>. Poor mental health also tends to carry over into adulthood<sup>17,18</sup>, highlighting the importance of preventive efforts during adolescence. Currently the evidence indicates that PA may have a positive impact on anxiety, depression and self-esteem among adolescents, although our knowledge is limited<sup>1</sup>. Studies commonly assess these relationships without considering different developmental stages during adolescence. Further, the need for PA measures which account for various types of sports/activities has been emphasized<sup>1</sup>. No large population-based studies have evaluated PA levels and type of sport participation in relation to mental health among girls and boys in different adolescent age groups. Identification of these relationships could have implications for preventive

1  
2  
3 programs and may contribute to more accurate strategies for increasing engagement in PA and  
4  
5 improving mental health among adolescents.  
6

7  
8 The aim of this study was to describe PA levels and the frequency of sport participation in a large  
9  
10 population-based sample of adolescents stratified by age group (junior vs senior high school  
11  
12 students) and gender. Further, to explore associations between PA level, type of sport  
13  
14 participation, and mental health, including psychological distress, self-esteem, and life  
15  
16 satisfaction, among boys and girls across adolescent age groups. As early adolescent stage versus  
17  
18 mid-late adolescence is characterized by a major shift in psychosocial development tasks, where  
19  
20 peer relationships become more salient <sup>19 20</sup>, the social benefits of sports participation may be of  
21  
22 greater importance with increasing age through adolescence. We therefore hypothesised that a  
23  
24 high level of PA and participation in sports would be associated with lower levels of  
25  
26 psychological distress, higher self-esteem, and greater life satisfaction, particularly among high  
27  
28 school students and participants in team sports.  
29  
30  
31  
32  
33  
34  
35  
36  
37  
38  
39  
40  
41  
42  
43  
44  
45  
46  
47  
48  
49  
50  
51  
52  
53  
54  
55  
56  
57  
58  
59  
60

## Methods

### *Study sample*

From 2006-2008 all adolescent residents (age 13-19 years) of the Nord-Trøndelag county in Norway (N=10464) were invited to participate in the third wave of the population-based Nord-Trøndelag Health Study (Young-HUNT3). The attendees completed a comprehensive health-related questionnaire during school hours. Of those invited, 7716 (74%) adolescents responded to the questionnaire and attended a clinical examination. The response rate was 82% among junior high school students and 69% among senior high school students. Participants not enrolled in school (N=84) and participants  $\geq 20$  years of age (N=13) were excluded from the analyses in this study. Thus, the study sample comprised 7619 participants (73%) (Appendix), of whom 4615 (61%) went to junior high school. All participants in senior high school were  $\geq 16$  years old.

### *Exposure variables*

Leisure time PA level was assessed by a validated question on frequency of PA from the World Health Organization Health Behavior in Schoolchildren (WHO HBSC) Survey Questionnaire<sup>21</sup>  
<sup>22</sup>: Outside school hours: "How often do you usually exercise in your free time so much that you get out of breath or sweat?". The level of intensity during exercise where you breathe heavily and/or sweat refers to moderate to vigorous activity. Response alternatives were: every day, 4-6 days/week, 2-3 days/week, 1 day/week, less than every week, less than every month, and never. Responses were categorized into three levels of PA: "Low PA" ( $\leq 1$  days/week) (reference group), "moderate PA" (2-3 days/week), and "high PA" ( $\geq 4$  days/week).

Type and frequency of sport participation was assessed by the question: "How often have you participated in the following activities/sports in the last 12 months?"; endurance sports (e.g. cross-country skiing, swimming, running), team sports (e.g. soccer, volleyball, handball), strength sports (e.g. weightlifting, bodybuilding), technical sports (e.g. track and field, alpine

1  
2  
3 skiing, snowboard), aesthetic sports (e.g. dance, gymnastics), martial arts (e.g. judo, karate,  
4 boxing), extreme sports (e.g. rafting, rock climbing, paragliding), jogging/walking, and other.  
5  
6 Four alternatives were given for describing the frequency of participation in each of the sport  
7 categories: never, less than once a week, once a week, several times a week. A frequency of “at  
8 least once a week” was defined as active participation. Furthermore, adolescents were classified  
9 by their participation in sports into team sports (e.g. soccer, volleyball, handball) or individual  
10 sports (all other sports). The reference group consisted of those with no or infrequent  
11 participation in all the sport categories, as well as those who reported a low level of PA. The  
12 groups were mutually exclusive. Responses to “jogging/walking” were not defined as separate  
13 sport activities/participation, as they may also be performed in non-sport contexts. The activity  
14 “jogging/walking” was, however, included in all exposure categories; “jogging/walking” at least  
15 once a week was reported among 61% of those participating in individual sports, among 71% of  
16 those participating in team sports, and among 33% of those with no/infrequent sport participation  
17 or low PA level.  
18  
19  
20  
21  
22  
23  
24  
25  
26  
27  
28  
29  
30  
31  
32  
33  
34  
35  
36  
37

### 38 *Outcome variables - Mental health*

39  
40 Psychological distress was assessed using a validated short version of the Hopkins Symptom  
41 Check List (SCL-5)<sup>23 24</sup>, including the phrases: “During the last 14 days: I have been constantly  
42 afraid and anxious; I have felt tense or uneasy; I have felt hopeless about the future; I have felt  
43 dejected or sad; I have worried too much about various things”. Responses were scored according  
44 to four response alternatives ranging from “not at all bothered” (1) to “extremely bothered” (4). A  
45 mean score was calculated, and a cut-off for symptoms of anxiety and depression was set at a  
46 mean score above two<sup>23</sup>. The five-item version (SCL-5) has shown high correlation with the 25-  
47 item SCL-25 ( $r = 0.92$ )<sup>24</sup> and good internal consistency (Cronbach’s alpha 0.87)<sup>23</sup>.  
48  
49  
50  
51  
52  
53  
54  
55  
56  
57  
58  
59  
60

1  
2  
3 Self-esteem/feelings of self-worth was measured using a short version of the Rosenberg  
4 Self-Esteem Scale (RSES) (original 10 items)<sup>25</sup>, including four statements: “I have a positive  
5 attitude toward myself”, “I feel rather useless at times”, “I feel that I don’t have much to be proud  
6 of”, and “I feel that I am a valuable person, at least equal to other people”. Response alternatives  
7 were measured on a 4-point scale ranging from “I strongly agree” (1) to “I strongly disagree”  
8 (4). For the first and last items the scores were inverted. A mean score was calculated (range 4-  
9 16), with higher scores indicating higher levels of self-esteem. A cut-off was set at a mean score  
10 of 10 (midpoint of the scale) to separate low and high self-esteem, corresponding to the  
11 recommended cut-off at 25 on the original 10-item RSES scale (range 10-40)<sup>26</sup>. The four-item  
12 version of the RSES is found to correlate at 0.95 with the full scale and to explain 0.90% of the  
13 full-scale variance, and has good internal consistency (Cronbach’s alpha 0.80)<sup>27</sup>.

14  
15  
16  
17  
18  
19  
20  
21  
22  
23  
24  
25  
26  
27  
28 Life satisfaction was measured with the question: “Thinking about your life at the  
29 moment, would you say that you by and large are satisfied with life, or are you mostly  
30 dissatisfied?” Response alternatives were measured on a 7-point scale ranging from “very  
31 satisfied” (1) to “very dissatisfied” (7), and were coded into a dichotomous outcome variable  
32 where adolescents who responded 1-3 were classified as “high life satisfaction”, and those who  
33 responded 4-7 were classified as “low life satisfaction”. A single-item life satisfaction measure is  
34 shown to perform almost as well as the multiple-item Satisfaction with Life Scale (SWLS)<sup>28 29</sup>.

### 35 36 37 38 39 40 41 42 43 44 45 46 47 *Potential confounders*

48  
49 Data on gender and age were obtained from the Norwegian National Population Registry.  
50  
51 Socioeconomic status was based on participants’ reports of perceived family economy. Pubertal  
52 development was assessed by self-reported pubertal status using the validated Pubertal  
53 Development Scale (PDS)<sup>30</sup>. Participants were asked to rate their own growth and to assess pubic  
54 hair growth. Further, boys were asked to assess changes in voice and facial hair growth, while  
55  
56  
57  
58  
59  
60

1  
2  
3 girls were asked about age at menarche and breast development. Pubertal changes were reported  
4  
5 on scales ranging from 1 (has not begun) to 4 (development completed). Menarche was  
6  
7 dichotomized into yes (coded 4) and no (coded 1). The items were summed up and an average  
8  
9 PDS score was calculated.  
10

11  
12 Exposure to interpersonal violence was assessed with questions derived from The  
13  
14 University of California at Los Angeles Post-traumatic Stress Disorder Reaction Index (UCLA  
15  
16 PTSD Reaction Index)<sup>31</sup>: “Have you ever experienced any of these events?” (no or yes): 1) Been  
17  
18 subjected to violence (beaten or injured), 2) Been subjected to unpleasant/disagreeable sexual  
19  
20 acts by someone approximately your own age, 3) Been subjected to unpleasant/disagreeable  
21  
22 sexual acts by an adult, and 4) Been threatened or physically harassed by fellow students at  
23  
24 school over a period of time. Responses were categorized as “prior violence”, “prior sexual  
25  
26 abuse” (by peer or adult), and “prior bullying”<sup>32</sup>.  
27  
28  
29  
30  
31  
32

### 33 *Statistical analyses*

34  
35 Categorical variables were described with counts and percentages, and continuous variables with  
36  
37 mean and standard deviation (SD). Possible associations between gender and age distribution  
38  
39 were assessed with Chi-square tests.  
40  
41

42  
43 The associations between 1) PA level and 2) type of sport participation and the mental  
44  
45 health outcomes were evaluated using multiple logistic regression models. The results are  
46  
47 expressed as odds ratios (OR) with 95% confidence intervals (CI). Analyses were stratified by  
48  
49 gender and school level (junior and senior high school). To adjust for potential confounding, age,  
50  
51 puberty development (PDS), socio-economic status, prior violence, sexual abuse (by peer or  
52  
53 adult), and bullying were all included in the multiple models. All tests were two-sided, and the  
54  
55 significance level was set to 5%. Analyses were performed using SPSS version 25 (SPSS Inc.,  
56  
57 Chicago, IL).  
58  
59  
60



1  
2  
3 Due to missing data on pubertal development (PDS score) (13% in girls, 15% in boys), a  
4 model-based imputation for this variable was performed. Linear regression models stratified by  
5 gender were fitted with age and body mass index (BMI). Residuals for both models followed  
6 standard normal distribution and the model fit was very good. The missing values were replaced  
7 with the predicted values. The predicted variables and the original variables for both genders  
8 were highly correlated,  $r=0.75$  and  $r=0.85$  for boys and girls, respectively.  
9  
10  
11  
12  
13  
14  
15  
16  
17  
18

### 19 *Ethics*

20  
21  
22 The current study has been approved by the Regional Committee for Medical Research Ethics  
23 (2014/1228/REK Sør-Øst A). The Young-HUNT Studies have been approved by REK and the  
24 Data Inspectorate of Norway. Participation in the study was voluntary. Inclusion in Young-  
25 HUNT was based on written consent from participants 16 years of age or older, and from the  
26 parents of those under 16 years of age, in accordance with Norwegian law.  
27  
28  
29  
30  
31  
32  
33  
34  
35

### 36 *Patient and Public Involvement*

37  
38 When preparing for the Young-HUNT3 survey, the HUNT research centre appointed reference  
39 groups consisting of student representatives (13-19 years), as well as representatives from the  
40 county school authorities and county doctors. Content of the questionnaires, clinical examination,  
41 implementation of results and protection of privacy have been discussed with these  
42 representatives. Results from the current study have been presented and discussed with the Youth  
43 Panel for Research at the Research and Communication Unit for Musculoskeletal Health  
44 (FORMI), Oslo University Hospital. The HUNT research centre has an active information policy  
45 and publishes annual newsletters for participants as well as regular reports on the HUNT web-site  
46 (<https://www.ntnu.no/hunt/om>).  
47  
48  
49  
50  
51  
52  
53  
54  
55  
56  
57  
58  
59  
60

## Results

### *Characteristics of the study sample*

In total, 3785 boys and 3834 girls were included in the analyses. Characteristics of the study sample are summarized in Table 1. The mean age was 15.8 years (SD 1.7). About 10% reported living in families with an economy below average, and reports of exposure to interpersonal violence was higher among senior as compared to junior high school students, with physical violence being more common in boys, sexual violence more common in girls, and bullying more evenly distributed between the sexes. Girls reported more mental health problems than boys, with the highest levels of psychological distress found among girls in high school (Table 1).

**Table 1** Characteristics of the study sample (n =7619)

| Characteristics                             | Girls (%)               |                         | Boys (%)                |                         |
|---------------------------------------------|-------------------------|-------------------------|-------------------------|-------------------------|
|                                             | Junior high<br>N = 2298 | Senior high<br>N = 1536 | Junior high<br>N = 2317 | Senior high<br>N = 1468 |
| Age, mean (SD)                              | 14.6 (0.89)             | 17.6 (0.86)             | 14.6 (0.89)             | 17.5 (0.84)             |
| Socioeconomic status; family economy, n (%) |                         |                         |                         |                         |
| Above average                               | 297 (12.9)              | 264 (17.2)              | 402 (17.4)              | 319 (21.7)              |
| Average                                     | 1644 (71.5)             | 1077 (70.1)             | 1521 (65.6)             | 939 (64.0)              |
| Below average                               | 204 (8.9)               | 144 (9.4)               | 141 (6.1)               | 136 (9.3)               |
| Missing                                     | 153 (6.7)               | 253 (10.9)              | 253 (10.9)              | 74 (5.0)                |
| Puberty (PDS score), mean (SD)              | 2.90 (0.68)             | 3.49 (0.51)             | 2.56 (0.61)             | 3.34 (0.47)             |
| Missing                                     | 10 (0.4)                | 5 (0.3)                 | -                       | 1 (0.0)                 |
| Interpersonal violence, n (%)               |                         |                         |                         |                         |
| Physical violence                           | 122 (5.3)               | 138 (9.0)               | 200 (8.6)               | 246 (16.8)              |
| Missing                                     | 96 (4.2)                | 34 (2.2)                | 167 (7.2)               | 65 (4.4)                |
| Sexual abuse                                | 123 (5.4)               | 169 (11.0)              | 50 (2.2)                | 44 (3.0)                |
| Missing                                     | 103 (4.5)               | 32 (2.1)                | 170 (7.3)               | 58 (4.0)                |
| Bullying                                    | 140 (6.1)               | 129 (8.4)               | 183 (7.9)               | 117 (8.0)               |
| Missing                                     | 107 (4.7)               | 32 (2.1)                | 170 (7.3)               | 58 (4.0)                |
| Mental health outcomes                      |                         |                         |                         |                         |
| Psychological distress (SCL5)*, n (%)       |                         |                         |                         |                         |
| SCL5 ≥2                                     | 350 (15.2)              | 362 (23.6)              | 111 (4.8)               | 110 (7.5)               |
| SCL5 <2                                     | 1892 (82.3)             | 1138 (74.1)             | 2093 (90.3)             | 1302 (88.7)             |
| Missing                                     | 56 (2.4)                | 36 (2.3)                | 113 (4.9)               | 56 (3.8)                |
| Self-esteem (RSE)†, n (%)                   |                         |                         |                         |                         |
| RSE <10                                     | 660 (28.7)              | 442 (28.8)              | 304 (13.1)              | 192 (13.1)              |
| RSE ≥10                                     | 1499 (65.2)             | 1029 (67.0)             | 1847 (79.7)             | 1199 (81.7)             |
| Missing                                     | 139 (6.0)               | 65 (4.2)                | 166 (7.2)               | 77 (5.2)                |
| Life satisfaction, n (%)                    |                         |                         |                         |                         |
| Low life satisfaction                       | 722 (31.4)              | 469 (30.5)              | 373 (16.1)              | 223 (15.2)              |
| High life satisfaction                      | 1525 (66.4)             | 1050 (68.4)             | 1872 (80.8)             | 1212 (82.6)             |
| Missing                                     | 51 (2.2)                | 17 (1.1)                | 72 (3.1)                | 33 (2.2)                |

PDS = Pubertal Development Scale

\* Range 1-4, †Range 4-16

### ***PA level and sport participation***

More boys reported a high level of PA (45.2%) compared to girls (35.4%) ( $p < .001$ ). For both genders, junior high school students reported significantly higher levels of PA than senior high school students (Table 2). Of the various sports, team sports were most commonly reported by both girls and boys, with almost two thirds of the adolescents participating in such sports at least once a week (Table 2). For both genders, participation in team and technical sports was less common among senior high school students as compared to junior high school students ( $p < .001$ ). In contrast, a significantly higher proportion of both girls and boys in senior high school were engaged in strength sports compared to those in junior high school. Significantly, more girls than boys participated in aesthetic sports, while a higher proportion of boys participated in strength sports and extreme sports, in both age groups (Table 2).

**Table 2** Physical activity (PA) level and sport participation rates in relation to gender and school level

|                                          | Girls (%)   |             |                   | Boys (%)    |             |                   |
|------------------------------------------|-------------|-------------|-------------------|-------------|-------------|-------------------|
|                                          | Junior high | Senior high | <i>p</i> -value   | Junior high | Senior high | <i>p</i> -value   |
| <b>PA level</b>                          |             |             |                   |             |             |                   |
| High PA                                  | 38.4        | 32.4        |                   | 46.5        | 43.8        |                   |
| Moderate PA                              | 39.9        | 34.3        |                   | 33.1        | 28.0        |                   |
| Low PA                                   | 20.2        | 31.6        | <b>&lt;0.001*</b> | 18.5        | 27.2        | <b>&lt;0.001*</b> |
| Missing                                  | 1.5         | 1.6         |                   | 1.9         | 1.0         |                   |
| <b>Sport participation (≥1 day/week)</b> |             |             |                   |             |             |                   |
| Team sports                              | <b>64.7</b> | <b>49.9</b> | <b>&lt;0.001</b>  | <b>65.8</b> | <b>56.7</b> | <b>&lt;0.001</b>  |
| Endurance sports                         | 46.0        | 45.5        | 0.63              | 51.4        | 49.4        | 0.06              |
| Aesthetic sports                         | 25.9        | 27.3        | 0.43              | 6.0         | 5.2         | 0.25              |
| Strength sports                          | <b>20.5</b> | <b>29.7</b> | <b>&lt;0.001</b>  | <b>33.8</b> | <b>47.6</b> | <b>&lt;0.001</b>  |
| Martial arts                             | 3.5         | 4.4         | 0.17              | 7.6         | 7.6         | 0.85              |
| Technical sports                         | <b>28.0</b> | <b>16.7</b> | <b>&lt;0.001</b>  | <b>26.8</b> | <b>20.8</b> | <b>&lt;0.001</b>  |
| Extreme sports                           | 1.0         | 0.8         | 0.71              | 4.6         | 4.7         | 0.99              |

Bold: statistically significant,  $p < 0.05$ , \* chi-square test for trend

Low PA =  $\leq 1$  day/week, moderate PA = 2-3 days/week, high PA =  $\geq 4$  days/week).

### ***PA and mental health***

A high level of PA, compared to a low level of PA, was significantly associated with reduced odds of low self-esteem and low life satisfaction among all students (Table 3). In senior high school students, a high level of PA was significantly associated with reduced odds of psychological distress (OR = 0.63, 95% CI [0.46-0.86] for girls and OR = 0.46, 95% CI [0.27-0.79] for boys).

### ***Sport participation and mental health***

Participation in team sports, compared with no/infrequent sport participation, was significantly associated with reduced odds of low self-esteem for girls, both in junior high school (OR = 0.45, 95% [0.32-0.64]) and senior high school (OR = 0.57, 95% CI [0.39-0.84]). A similar non-significant trend was observed in boys (Table 4). Participation in individual sports was significantly associated with reduced odds of low self-esteem among senior high school boys (OR = 0.37, 95% CI [0.18-0.76]).

Participation in team sports was associated with reduced odds of low life satisfaction, among all girls and among junior high school boys (Table 4). Among girls in senior high school, team sport participation was also significantly associated with reduced odds of psychological distress (OR = 0.70, 95% CI [0.49 – 1.00]). In boys and junior high school girls, no statistically significant associations between sport participation and psychological distress were revealed in the adjusted models (Table 4).

**Table 3** Associations between levels of physical activity and mental health problems (psychological distress, low self-esteem, and low life satisfaction) among girls and boys in junior and senior high school.

| Physical activity (PA) level                                 | Outcome                                     |                           |                           |                           |
|--------------------------------------------------------------|---------------------------------------------|---------------------------|---------------------------|---------------------------|
|                                                              | OR (OR, 95% CI) for psychological distress* |                           |                           |                           |
|                                                              | Junior high school                          |                           | Senior high school        |                           |
|                                                              | Unadjusted                                  | Adjusted <sup>a</sup>     | Unadjusted                | Adjusted <sup>a</sup>     |
| <b>Girls</b>                                                 |                                             |                           |                           |                           |
| Low PA                                                       | 1.0 (Reference)                             | 1.0 (Reference)           | 1.0 (Reference)           | 1.0 (Reference)           |
| Moderate PA (2-3 d/w)                                        | 0.80 (0.59 – 1.07)                          | 0.86 (0.62 – 1.21)        | <b>0.68 (0.51 – 0.90)</b> | <b>0.73 (0.54 – 0.99)</b> |
| High PA (≥4 d/w)                                             | <b>0.67 (0.49 – 0.91)</b>                   | 0.88 (0.63 – 1.24)        | <b>0.53 (0.39 – 0.72)</b> | <b>0.63 (0.46 – 0.86)</b> |
| <b>Boys</b>                                                  |                                             |                           |                           |                           |
| Low PA                                                       | 1.0 (Reference)                             | 1.0 (Reference)           | 1.0 (Reference)           | 1.0 (Reference)           |
| Moderate PA (2-3 d/w)                                        | <b>0.54 (0.32 – 0.90)</b>                   | <b>0.56 (0.31 – 0.99)</b> | 0.78 (0.49 – 1.23)        | 0.89 (0.53 – 1.49)        |
| High PA (≥4 d/w)                                             | <b>0.58 (0.56 – 0.91)</b>                   | 0.70 (0.41 – 1.18)        | <b>0.38 (0.23 – 0.62)</b> | <b>0.46 (0.27 – 0.79)</b> |
| <b>OR (OR, 95% CI) for low self-esteem (RSE)<sup>†</sup></b> |                                             |                           |                           |                           |
| <b>Girls</b>                                                 |                                             |                           |                           |                           |
| Low PA                                                       | 1.0 (Reference)                             | 1.0 (Reference)           | 1.0 (Reference)           | 1.0 (Reference)           |
| Moderate PA (2-3 d/w)                                        | <b>0.63 (0.48 – 0.82)</b>                   | <b>0.65 (0.49 – 0.87)</b> | <b>0.68 (0.30 – 0.93)</b> | <b>0.72 (0.52 – 0.99)</b> |
| High PA (≥4 d/w)                                             | <b>0.53 (0.40 – 0.70)</b>                   | <b>0.59 (0.44 – 0.80)</b> | <b>0.43 (0.31 – 0.61)</b> | <b>0.49 (0.34 – 0.70)</b> |
| <b>Boys</b>                                                  |                                             |                           |                           |                           |
| Low PA                                                       | 1.0 (Reference)                             | 1.0 (Reference)           | 1.0 (Reference)           | 1.0 (Reference)           |
| Moderate PA (2-3 d/w)                                        | <b>0.37 (0.24 – 0.58)</b>                   | <b>0.32 (0.20 – 0.53)</b> | 0.66 (0.38 – 1.15)        | 0.67 (0.37 – 1.20)        |
| High PA (≥4 d/w)                                             | <b>0.31 (0.20 – 0.48)</b>                   | <b>0.33 (0.21 – 0.52)</b> | <b>0.41 (0.24 – 0.71)</b> | <b>0.44 (0.25 – 0.79)</b> |
| <b>OR (OR, 95% CI) for low life satisfaction</b>             |                                             |                           |                           |                           |
| <b>Girls</b>                                                 |                                             |                           |                           |                           |
| Low PA                                                       | 1.0 (Reference)                             | 1.0 (Reference)           | 1.0 (Reference)           | 1.0 (Reference)           |
| Moderate PA (2-3 d/w)                                        | <b>0.60 (0.48 – 0.76)</b>                   | <b>0.59 (0.45 – 0.76)</b> | <b>0.66 (0.51 – 0.85)</b> | <b>0.68 (0.52 – 0.89)</b> |
| High PA (≥4 d/w)                                             | <b>0.43 (0.34 – 0.55)</b>                   | <b>0.49 (0.37 – 0.63)</b> | <b>0.45 (0.34 – 0.59)</b> | <b>0.51 (0.38 – 0.69)</b> |
| <b>Boys</b>                                                  |                                             |                           |                           |                           |
| Low PA                                                       | 1.0 (Reference)                             | 1.0 (Reference)           | 1.0 (Reference)           | 1.0 (Reference)           |
| Moderate PA (2-3 d/w)                                        | <b>0.67 (0.51 – 0.90)</b>                   | <b>0.65 (0.47 – 0.90)</b> | 0.76 (0.53 – 1.08)        | 0.73 (0.50 – 1.08)        |
| High PA (≥4 d/w)                                             | <b>0.42 (0.32 – 0.56)</b>                   | <b>0.44 (0.32 – 0.60)</b> | <b>0.44 (0.31 – 0.62)</b> | <b>0.43 (0.30 – 0.63)</b> |

OR = odds ratio, CI = confidence interval, Bold: statistically significant associations,  $p < 0.05$ .

\* SCL5  $\geq 2$  (range 0-4),  $\dagger$  RSE  $< 10$  (range 4-16)

<sup>a</sup> Adjusted for age, puberty score (PDS), socioeconomic status, prior physical violence, prior bullying, prior sexual abuse

**Table 4** Associations between sport participation and mental health problems (psychological distress, low self-esteem, and low life satisfaction) among girls and boys in junior and senior high school.

| Sport participation                                    | Outcome                                     |                           |                           |                           |
|--------------------------------------------------------|---------------------------------------------|---------------------------|---------------------------|---------------------------|
|                                                        | OR (OR, 95% CI) for psychological distress* |                           |                           |                           |
|                                                        | Junior high school                          |                           | Senior high school        |                           |
|                                                        | Unadjusted                                  | Adjusted <sup>a</sup>     | Unadjusted                | Adjusted <sup>a</sup>     |
| <b>Girls</b>                                           |                                             |                           |                           |                           |
| No sport                                               | 1.0 (Reference)                             | 1.0 (Reference)           | 1.0 (Reference)           | 1.0 (Reference)           |
| Individual sports                                      | 1.06 (0.70 – 1.60)                          | 1.09 (0.68 – 1.73)        | 0.87 (0.61 – 1.22)        | 0.93 (0.64 – 1.35)        |
| Team sports                                            | 0.78 (0.53 – 1.14)                          | 1.02 (0.66 – 1.56)        | <b>0.56 (0.40 – 0.78)</b> | <b>0.70 (0.49 – 1.00)</b> |
| <b>Boys</b>                                            |                                             |                           |                           |                           |
| No sport                                               | 1.0 (Reference)                             | 1.0 (Reference)           | 1.0 (Reference)           | 1.0 (Reference)           |
| Individual sports                                      | 1.04 (0.56 – 1.95)                          | 1.04 (0.52 – 2.09)        | 0.85 (0.49 – 1.49)        | 0.98 (0.51 – 1.88)        |
| Team sports                                            | <b>0.55 (0.31 – 0.99)</b>                   | 0.60 (0.31 – 1.15)        | <b>0.57 (0.34 – 0.96)</b> | 0.93 (0.50 – 1.70)        |
| <b>OR (OR, 95% CI) for low self-esteem<sup>†</sup></b> |                                             |                           |                           |                           |
| <b>Girls</b>                                           |                                             |                           |                           |                           |
| No sport                                               | 1.0 (Reference)                             | 1.0 (Reference)           | 1.0 (Reference)           | 1.0 (Reference)           |
| Individual sports                                      | <b>0.52 (0.37 – 0.75)</b>                   | <b>0.55 (0.37 – 0.81)</b> | 0.77 (0.53 – 1.11)        | 0.81 (0.55 – 1.20)        |
| Team sports                                            | <b>0.42 (0.30 – 0.57)</b>                   | <b>0.45 (0.32 – 0.64)</b> | <b>0.50 (0.35 – 0.71)</b> | <b>0.57 (0.39 – 0.84)</b> |
| <b>Boys</b>                                            |                                             |                           |                           |                           |
| No sport                                               | 1.0 (Reference)                             | 1.0 (Reference)           | 1.0 (Reference)           | 1.0 (Reference)           |
| Individual sports                                      | 1.11 (0.62 – 1.99)                          | 1.43 (0.73 – 2.79)        | <b>0.42 (0.22 – 0.82)</b> | <b>0.37 (0.18 – 0.76)</b> |
| Team sports                                            | <b>0.53 (0.30 – 0.92)</b>                   | 0.72 (0.38 – 1.36)        | <b>0.47 (0.27 – 0.81)</b> | 0.57 (0.32 – 1.03)        |
| <b>OR (OR, 95% CI) for low life satisfaction</b>       |                                             |                           |                           |                           |
| <b>Girls</b>                                           |                                             |                           |                           |                           |
| No sport                                               | 1.0 (Reference)                             | 1.0 (Reference)           | 1.0 (Reference)           | 1.0 (Reference)           |
| Individual sports                                      | <b>0.70 (0.51 – 0.96)</b>                   | 0.71 (0.50 – 1.00)        | <b>0.66 (0.48 – 0.91)</b> | <b>0.65 (0.46 – 0.91)</b> |
| Team sports                                            | <b>0.46 (0.34 – 0.61)</b>                   | <b>0.51 (0.37 – 0.70)</b> | <b>0.48 (0.36 – 0.65)</b> | <b>0.55 (0.40 – 0.76)</b> |
| <b>Boys</b>                                            |                                             |                           |                           |                           |
| No sport                                               | 1.0 (Reference)                             | 1.0 (Reference)           | 1.0 (Reference)           | 1.0 (Reference)           |
| Individual sports                                      | 1.00 (0.68 – 1.46)                          | 0.99 (0.65 – 1.52)        | 0.84 (0.55 – 1.29)        | 0.80 (0.50 – 1.28)        |
| Team sports                                            | <b>0.56 (0.39 – 0.79)</b>                   | <b>0.63 (0.43 – 0.93)</b> | <b>0.62 (0.42 – 0.92)</b> | 0.72 (0.47 – 1.12)        |

OR = odds ratio, CI = confidence interval, Bold: statistically significant associations,  $p < 0.05$ .

\*  $SCL5 \geq 2$  (range 0-4), <sup>†</sup>  $RSE < 10$  (range 4-16)

<sup>a</sup> Adjusted for age, puberty score (PDS), socioeconomic status, prior physical violence, prior bullying, prior sexual abuse



## Discussion

In this population-based sample of adolescents, PA levels and participation rates in sports were lower among girls, and lower among senior high school students compared to junior high school students. Our results showed that higher levels of PA were favourably associated with self-esteem and life satisfaction throughout adolescence, as well as with reduced likelihood of psychological distress in senior high school students. Further, team sport participation was associated with mental health benefits, especially for girls.

### Strengths and limitations

The main strengths of our study include the large sample size of adolescents from an unselected general population, a high participation rate (73%), and the information including frequency of participation in sports. To our knowledge, such comprehensive information about sport participation in relation to gender and age differences has not previously been presented. This information enabled us to examine the relationship between sport participation and mental health outcomes, including the aspect of various types of sports, in contrast to most studies on this topic which mainly focus on general PA. We used validated measures of mental health outcomes. Another strength is that we were able to adjust for a variety of possible confounders, as well as including exposures to interpersonal violence as these exposures may have an impact on both PA behaviours and mental health<sup>33-35</sup>.

The main limitation of this study is the cross-sectional study design, and the resultant inability to demonstrate the direction of the association. Further, as measures were self-reported, the included variables are susceptible to information bias. We have used a single item measure to assess PA, and the variable used to describe sport participation exposure provides a crude measure of frequency of participation. However, the WHO HBSC question of PA used in this

1  
2  
3 study has been found to hold acceptable reliability and validity in adolescent samples <sup>21 22</sup>. It  
4  
5 should be noted that a proportion of the “High PA” group in this study may not fulfil the  
6  
7 recommended levels of daily PA according to the WHO guidelines <sup>36</sup>, as this group includes all  
8  
9 those who played sports or exercised at least 4 days/week. Although measures of psychological  
10  
11 distress (SCL-5) and self-esteem (RSES) were shortened versions of the original instruments, the  
12  
13 measurement precision of these versions is found to be high and sufficient for use in population-  
14  
15 based studies <sup>23 24 27</sup>. Furthermore, dichotomization of the mental health outcomes makes them  
16  
17 prone to misclassification. However, the cut-off values to distinguish those with high vs low  
18  
19 degree of psychological distress (SCL-5) and low self-esteem (RSES) have both been shown to  
20  
21 be clinically relevant cut-points <sup>23 26</sup>. In contrast to psychological distress, low self-esteem and  
22  
23 low life satisfaction were not more prevalent in the older age group, reflecting the measurement  
24  
25 of different phenomena. Psychological distress is found to function as a proxy measure of  
26  
27 symptoms of anxiety and depression <sup>23 24</sup>, while self-esteem and life satisfaction are more closely  
28  
29 related to subjective well-being <sup>28 37</sup> which may be more stable traits.  
30  
31  
32  
33  
34

35 Although the response rate in Young-HUNT3 was high, the lower response among senior  
36  
37 high school students compared to junior high school students may represent a selection bias. In  
38  
39 Norway, most adolescents start senior high school the year they turn 16. Differences in school  
40  
41 systems in other countries, as well as differences related to opportunities for engagement in sports  
42  
43 and the organization of various youth sports may limit the generalizability of the results from this  
44  
45 study. Norwegian society is rooted in egalitarian ideals, with "Sport for All" as a high priority and  
46  
47 policy aim <sup>38</sup>; this may be part of the reason why sport participation found in this study is high by  
48  
49 international standards. Lastly, the results of this study should be interpreted with caution due to  
50  
51 multiple testing, and replication of results is warranted.  
52  
53  
54  
55  
56  
57  
58  
59  
60

### **Our results according to previous findings, and interpretation of findings**

The findings from this study confirmed the gender differences in PA levels found in other population-based studies, with girls being less physically active than boys<sup>11-13</sup>. Also in line with reports from other studies, fewer girls were involved in sports<sup>7 13 14 39</sup>. The lower levels of PA and sport participation found among senior high school students confirms findings from previous studies reporting a decline in PA during adolescence<sup>10 11 40 41</sup>, especially between the ages of 15 and 16 years<sup>11</sup>. Drop-out from sports for adolescents at this age may be related, in part, to the difficulty of meeting the increasing demands of participation in both school and sport<sup>7 42</sup>. However, a systematic review of factors associated with drop-out from organized sports, reported that lack of enjoyment and perceptions of competence are the two most dominant factors related to drop-out from sports among adolescents<sup>42</sup>.

The current findings are in line with previous studies reporting associations between adolescents' PA and mental health, including lower likelihood of depressive symptoms<sup>1 11 13 43 44</sup>, as well as greater well-being<sup>13</sup> and higher self-esteem among those who are physically active<sup>1 44</sup>. Longitudinal studies also indicate that PA may protect against the development of depression<sup>45 46</sup>. Furthermore, PA may be a helpful intervention for adolescents struggling with depressive symptoms<sup>47 48</sup>. Regarding engagement in sports, the results of the present study are in accordance with the literature indicating a positive relationship between sport participation and mental health<sup>9 13 49-51</sup>.

The findings from this study make several contributions to the body of research on the impact of PA and sports on mental health among adolescents. Firstly, age differences were revealed in these relationships, as a high PA level was associated with reduced psychological distress in high school students only. Explanations for why PA and sport participation may be of greater importance in reducing psychological distress among older adolescents could relate to how peer support and interaction play an increasingly important role during adolescence<sup>19 20</sup>.

1  
2  
3 Thus, social and physical activities with peers may be particularly beneficial for older  
4 adolescents, helping to distract them from depressive thoughts and to reduce the sense of  
5  
6 isolation.  
7  
8

9  
10 Secondly, this study shows that the potential beneficial effects related to mental health  
11 vary across various types of sport. Participation in team sports, compared to no participation, was  
12 more strongly related to beneficial mental health outcomes than individual sports compared to no  
13 participation, especially in high school girls. Other studies have reported that organized sports  
14 had a greater impact on depressive symptoms among girls than boys <sup>11</sup>, and that team sports may  
15 confer mental health benefits for girls in particular <sup>13</sup>. A systematic review of the psychological  
16 and social benefits of sport participation argued that team sports seem to be associated with more  
17 beneficial outcomes compared to individual sports due to the social aspect of being part of a team  
18  
19 <sup>9</sup>. In a recent study of a large representative sample of European adolescents, lower levels of  
20 anxiety and depression and higher levels of well-being were found among team sport participants  
21  
22 <sup>13</sup>. Team sport participation during adolescence has also been shown to be associated with lower  
23 levels of depressive symptoms in early adulthood <sup>50 52</sup>. In line with this, our findings highlight  
24 that type of sport, including the social aspect of participation, should be considered when  
25 examining the impact of sports on mental health among adolescents.  
26  
27

28  
29  
30  
31  
32  
33  
34  
35  
36  
37  
38  
39  
40  
41  
42 Overall, adolescents with a high PA and team sport participation had lower odds of having  
43 low self-esteem than of having psychological distress. These results are in accordance with  
44 findings from a review study showing that, of the several mental health outcomes associated with  
45 PA in young people, the strongest association was with self-esteem <sup>1</sup>. It may be that experiences  
46 of low self-esteem occur earlier than symptoms of anxiety and depression and that low self-  
47 esteem may trigger poor coping behavior and risk behavior that subsequently increases the  
48 likelihood of mental disorders <sup>53</sup>. A Cochrane review reports that exercise interventions have  
49  
50  
51  
52  
53  
54  
55  
56  
57  
58  
59  
60

1  
2  
3 positive short-term effects on self-esteem that may help prevent the development of  
4  
5 psychological and behavioral problems <sup>54</sup>.  
6

7  
8 This study contributes to our understanding of the implications lower levels of PA may  
9  
10 have on mental health in different phases of adolescence. Regardless of the direction of the  
11  
12 association between PA and mental health, inactive adolescents may carry a “double health  
13  
14 burden”, with both physical and mental health challenges. To help more adolescents increase or  
15  
16 maintain their levels of PA, interventions could include facilitation of a wider variety of sports  
17  
18 activities, and at different skill levels, to reach and engage more adolescents. As lack of  
19  
20 enjoyment has previously been found to be the most dominant factor related to drop-out from  
21  
22 sports <sup>40</sup>, increased focus on the joy of sports may be important in order to reduce drop-out rates  
23  
24 during adolescence. In efforts to reduce mental health problems, our results suggest that girls in  
25  
26 particular should be a target group for promotion of team sport participation.  
27  
28  
29  
30  
31  
32

### 33 **Conclusion and implications**

34  
35  
36 This study identified gender and age differences in PA and sport participation across adolescent  
37  
38 age-groups, with the lowest engagement in PA and sports found among girls in senior high  
39  
40 school. Our results indicate that a high PA level and sport participation have a positive impact on  
41  
42 various dimensions of mental health throughout adolescence, highlighting the importance of  
43  
44 continuing with sports in the late teens. The findings underline a need for interventions aimed at  
45  
46 maintaining or increasing PA and sport participation, especially for girls around the transition to  
47  
48 senior high school. Initiatives to help adolescents continue in team sports may be particularly  
49  
50 advantageous. Future studies should examine the effect of interventions for encouraging and  
51  
52 increasing PA and sport participation among adolescents, as well as their potential mental health  
53  
54 benefits.  
55  
56  
57  
58  
59  
60

## References

1. Biddle SJ, Asare M. Physical activity and mental health in children and adolescents: a review of reviews. *British journal of sports medicine* 2011;45:886-95. doi: 10.1136/bjsports-2011-090185
2. Hallal PC, Victora CG, Azevedo MR, et al. Adolescent physical activity and health: a systematic review. *Sports medicine (Auckland, NZ)* 2006;36:1019-30.
3. Strong WB, Malina RM, Blimkie CJ, et al. Evidence based physical activity for school-age youth. *The Journal of pediatrics* 2005;146:732-7. doi: 10.1016/j.jpeds.2005.01.055
4. Biddle SJ, Gorely T, Stensel DJ. Health-enhancing physical activity and sedentary behaviour in children and adolescents. *Journal of sports sciences* 2004;22:679-701. doi: 10.1080/02640410410001712412
5. Sawyer SM, Afifi RA, Bearinger LH, et al. Adolescence: a foundation for future health. *Lancet* 2012;379:1630-40. doi: 10.1016/s0140-6736(12)60072-5
6. Tammelin T, Nayha S, Hills AP, et al. Adolescent participation in sports and adult physical activity. *Am J Prev Med* 2003;24:22-8.
7. Kjonniksen L, Anderssen N, Wold B. Organized youth sport as a predictor of physical activity in adulthood. *Scandinavian journal of medicine & science in sports* 2009;19:646-54. doi: 10.1111/j.1600-0838.2008.00850.x
8. Belanger M, Sabiston CM, Barnett TA, et al. Number of years of participation in some, but not all, types of physical activity during adolescence predicts level of physical activity in adulthood: Results from a 13-year study. *The international journal of behavioral nutrition and physical activity* 2015;12:76. doi: 10.1186/s12966-015-0237-x
9. Eime RM, Young JA, Harvey JT, et al. A systematic review of the psychological and social benefits of participation in sport for children and adolescents: informing development of a conceptual model of health through sport. *The international journal of behavioral nutrition and physical activity* 2013;10:98. doi: 10.1186/1479-5868-10-98
10. Dumith SC, Gigante DP, Domingues MR, et al. Physical activity change during adolescence: a systematic review and a pooled analysis. *International journal of epidemiology* 2011;40:685-98. doi: 10.1093/ije/dyq272
11. Baldursdottir B, Valdimarsdottir HB, Krettek A, et al. Age-related differences in physical activity and depressive symptoms among 10–19-year-old adolescents: A population based study. *Psychology of Sport and Exercise* 2017;28:91-99. doi: 10.1016/j.psychsport.2016.10.007
12. Hallal PC, Andersen LB, Bull FC, et al. Global physical activity levels: surveillance progress, pitfalls, and prospects. *Lancet* 2012;380:247-57. doi: 10.1016/s0140-6736(12)60646-1
13. McMahon EM, Corcoran P, O'Regan G, et al. Physical activity in European adolescents and associations with anxiety, depression and well-being. *Eur Child Adolesc Psychiatry* 2017;26:111-22. doi: 10.1007/s00787-016-0875-9 [published Online First: 2016/06/10]
14. Pate RR, Trost SG, Levin S, et al. Sports participation and health-related behaviors among US youth. *Arch Pediatr Adolesc Med* 2000;154:904-11.
15. Belfer ML. Child and adolescent mental disorders: the magnitude of the problem across the globe. *Journal of child psychology and psychiatry, and allied disciplines* 2008;49:226-36. doi: 10.1111/j.1469-7610.2007.01855.x
16. Kieling C, Baker-Henningham H, Belfer M, et al. Child and adolescent mental health worldwide: evidence for action. *Lancet* 2011;378:1515-25. doi: 10.1016/s0140-6736(11)60827-1
17. Bertha EA, Balazs J. Subthreshold depression in adolescence: a systematic review. *Eur Child Adolesc Psychiatry* 2013;22:589-603. doi: 10.1007/s00787-013-0411-0



18. Fergusson DM, Horwood LJ, Ridder EM, et al. Subthreshold depression in adolescence and mental health outcomes in adulthood. *Archives of general psychiatry* 2005;62:66-72. doi: 10.1001/archpsyc.62.1.66
19. Christie D, Viner R. Adolescent development. *BMJ (Clinical research ed)* 2005;330:301-4. doi: 10.1136/bmj.330.7486.301
20. Brown BB, Larson J. Peer Relationships in Adolescence. *Handbook of Adolescent Psychology* 2009:74-103.
21. Rangul V, Holmen TL, Kurtze N, et al. Reliability and validity of two frequently used self-administered physical activity questionnaires in adolescents. *BMC medical research methodology* 2008;8:47. doi: 10.1186/1471-2288-8-47
22. Booth ML, Okely AD, Chey T, et al. The reliability and validity of the physical activity questions in the WHO health behaviour in schoolchildren (HBSC) survey: a population study. *British journal of sports medicine* 2001;35:263-7.
23. Strand BH, Dalgard OS, Tambs K, et al. Measuring the mental health status of the Norwegian population: a comparison of the instruments SCL-25, SCL-10, SCL-5 and MHI-5 (SF-36). *Nordic journal of psychiatry* 2003;57:113-8. doi: 10.1080/08039480310000932
24. Tambs K, Moum T. How well can a few questionnaire items indicate anxiety and depression? *Acta Psychiatrica Scandinavica* 1993;87:364-67.
25. Rosenberg M. *Society and the Adolescent Self-Image*. Revised edition. Middletown, CT: Wesleyan University Press 1989.
26. Isomaa R, Vaananen JM, Frojd S, et al. How low is low? Low self-esteem as an indicator of internalizing psychopathology in adolescence. *Health Educ Behav* 2013;40:392-9. doi: 10.1177/1090198112445481
27. Tambs K, Roysamb E. Selection of questions to short-form versions of original psychometric instruments in MoBa. *Norsk Epidemiologi* 2014;24:195-201.
28. Cheung F, Lucas RE. Assessing the validity of single-item life satisfaction measures: results from three large samples. *Quality of life research : an international journal of quality of life aspects of treatment, care and rehabilitation* 2014;23:2809-18. doi: 10.1007/s11136-014-0726-4
29. Jovanovic V. The validity of the Satisfaction with Life Scale in adolescents and a comparison with single-item life satisfaction measures: a preliminary study. *Quality of life research : an international journal of quality of life aspects of treatment, care and rehabilitation* 2016;25:3173-80. doi: 10.1007/s11136-016-1331-5
30. Petersen AC, Crockett L, Richards M, et al. A self-report measure of pubertal status: Reliability, validity, and initial norms. *Journal of youth and adolescence* 1988;17:117-33. doi: 10.1007/bf01537962
31. Steinberg AM, Brymer MJ, Decker KB, et al. The University of California at Los Angeles Post-traumatic Stress Disorder Reaction Index. *Current psychiatry reports* 2004;6:96-100.
32. Stensland SO, Zwart JA, Wentzel-Larsen T, et al. The headache of terror: A matched cohort study of adolescents from the Utoya and the HUNT Study. *Neurology* 2018;90:e111-e18. doi: 10.1212/wnl.0000000000004805
33. Hughes K, Bellis MA, Hardcastle KA, et al. The effect of multiple adverse childhood experiences on health: a systematic review and meta-analysis. *The Lancet Public health* 2017;2:e356-e66. doi: 10.1016/s2468-2667(17)30118-4
34. Stensland SO, Thoresen S, Wentzel-Larsen T, et al. Interpersonal violence and overweight in adolescents: the HUNT Study. *Scand J Public Health* 2015;43:18-26. doi: 10.1177/1403494814556176
35. McLaughlin KA, Greif Green J, Gruber MJ, et al. Childhood adversities and first onset of psychiatric disorders in a national sample of US adolescents. *Archives of general psychiatry* 2012;69:1151-60. doi: 10.1001/archgenpsychiatry.2011.2277

- 1
- 2
- 3 36. WHO Guidelines Approved by the Guidelines Review Committee. Global Recommendations
- 4 on Physical Activity for Health. Geneva: World Health Organization, 2010.
- 5 37. Du H, King RB, Chi P. Self-esteem and subjective well-being revisited: The roles of
- 6 personal, relational, and collective self-esteem. *PloS one* 2017;12:e0183958. doi:
- 7 10.1371/journal.pone.0183958
- 8 38. Skille EÅ, Säfvenbom R. Sport policy in Norway. *International Journal of Sport Policy*
- 9 2011;3:289-99. doi: 10.1080/19406940.2010.547867
- 10 39. Marques A, Ekelund U, Sardinha LB. Associations between organized sports participation
- 11 and objectively measured physical activity, sedentary time and weight status in youth.
- 12 *Journal of science and medicine in sport / Sports Medicine Australia* 2016;19:154-7. doi:
- 13 10.1016/j.jsams.2015.02.007
- 14 40. Dalene KE, Anderssen SA, Andersen LB, et al. Secular and longitudinal physical activity
- 15 changes in population-based samples of children and adolescents. *Scandinavian journal of*
- 16 *medicine & science in sports* 2018;28:161-71. doi: 10.1111/sms.12876
- 17 41. Sagatun A, Kolle E, Anderssen SA, et al. Three-year follow-up of physical activity in
- 18 Norwegian youth from two ethnic groups: associations with socio-demographic factors.
- 19 *BMC public health* 2008;8:419. doi: 10.1186/1471-2458-8-419
- 20 42. Crane J TV. A systemativ review of dropout from organized sport among childen and youth.
- 21 *European Physical Education Review* 2015;21:114-31.
- 22 43. Korczak DJ, Madigan S, Colasanto M. Children's Physical Activity and Depression: A Meta-
- 23 analysis. *Pediatrics* 2017;139. doi: 10.1542/peds.2016-2266
- 24 44. Ahn S, Fedewa AL. A meta-analysis of the relationship between children's physical activity
- 25 and mental health. *J Pediatr Psychol* 2011;36:385-97. doi: 10.1093/jpepsy/jsq107
- 26 45. Jerstad SJ, Boutelle KN, Ness KK, et al. Prospective reciprocal relations between physical
- 27 activity and depression in female adolescents. *J Consult Clin Psychol* 2010;78:268-72.
- 28 doi: 10.1037/a0018793
- 29 46. McPhie ML, Rawana JS. The effect of physical activity on depression in adolescence and
- 30 emerging adulthood: a growth-curve analysis. *Journal of adolescence* 2015;40:83-92. doi:
- 31 10.1016/j.adolescence.2015.01.008
- 32 47. Stubbs B, Vancampfort D, Hallgren M, et al. EPA guidance on physical activity as a
- 33 treatment for severe mental illness: a meta-review of the evidence and Position Statement
- 34 from the European Psychiatric Association (EPA), supported by the International
- 35 Organization of Physical Therapists in Mental Health (IOPTMH). *European psychiatry:*
- 36 *the journal of the Association of European Psychiatrists* 2018;54:124-44. doi:
- 37 10.1016/j.eurpsy.2018.07.004
- 38 48. Bailey AP, Hetrick SE, Rosenbaum S, et al. Treating depression with physical activity in
- 39 adolescents and young adults: a systematic review and meta-analysis of randomised
- 40 controlled trials. *Psychological Medicine* 2018;48:1068-83. doi:
- 41 10.1017/S0033291717002653
- 42 49. Jewett R, Sabiston CM, Brunet J, et al. School sport participation during adolescence and
- 43 mental health in early adulthood. *The Journal of adolescent health: official publication of*
- 44 *the Society for Adolescent Medicine* 2014;55:640-4. doi:
- 45 10.1016/j.jadohealth.2014.04.018
- 46 50. Brunet J, Sabiston CM, Chaiton M, et al. The association between past and current physical
- 47 activity and depressive symptoms in young adults: a 10-year prospective study. *Ann*
- 48 *Epidemiol* 2013;23:25-30. doi: 10.1016/j.annepidem.2012.10.006
- 49 51. Evans MB, Allan V, Erickson K, et al. Are all sport activities equal? A systematic review of
- 50 how youth psychosocial experiences vary across differing sport activities. *British journal*
- 51 *of sports medicine* 2017;51:169-76. doi: 10.1136/bjsports-2016-096725
- 52
- 53
- 54
- 55
- 56
- 57
- 58
- 59
- 60



- 1  
2  
3 52. Sabiston CM, Jewett R, Ashdown-Franks G, et al. Number of Years of Team and Individual  
4 Sport Participation During Adolescence and Depressive Symptoms in Early Adulthood. *J*  
5 *Sport Exerc Psychol* 2016;38:105-10. doi: 10.1123/jsep.2015-0175  
6  
7 53. Mann M, Hosman CM, Schaalma HP, et al. Self-esteem in a broad-spectrum approach for  
8 mental health promotion. *Health education research* 2004;19:357-72. doi:  
9 10.1093/her/cyg041  
10 54. Ekeland E, Heian F, Hagen KB, et al. Exercise to improve self-esteem in children and young  
11 people. *The Cochrane database of systematic reviews* 2004 (Online):CD003683. doi:  
12 10.1002/14651858.CD003683.pub2  
13  
14  
15  
16  
17  
18  
19  
20  
21  
22  
23  
24  
25  
26  
27  
28  
29  
30  
31  
32  
33  
34  
35  
36  
37  
38  
39  
40  
41  
42  
43  
44  
45  
46  
47  
48  
49  
50  
51  
52  
53  
54  
55  
56  
57  
58  
59  
60

For peer review only

1  
2  
3 **Contributors:** MHG processed, analysed and interpreted the data and drafted the initial  
4 manuscript. SØS, KS and JAZ were involved in the conception and design of the manuscript, as  
5 well as data interpretation and critical review and revision of the manuscript. MCS supervised the  
6 statistical analyses. MCS and MBJ were involved in critical review and revision of the manuscript.  
7  
8 All authors have read and approved the final manuscript.  
9

10  
11  
12  
13  
14 **Acknowledgements:** We would like to thank the adolescents participating in the adolescent part  
15 of the Nord-Trøndelag Health Study (Young-HUNT3) and the HUNT research centre for their  
16 cooperation. The HUNT Study is a collaboration between HUNT Research Centre (Faculty of  
17 Medicine and Health Sciences, Norwegian University of Science and Technology NTNU), Nord-  
18 Trøndelag County Council, Central Norway Regional Health Authority, and the Norwegian  
19 Institute of Public Health. We would also like to thank the patient representatives for their  
20 contribution to this study.  
21  
22  
23  
24  
25  
26  
27  
28  
29

30 **Funding:** This work was funded by The Norwegian Fund for Post-Graduate Training in  
31 Physiotherapy, Grant number 61741.  
32  
33  
34

35 **Competing interests:** None declared.  
36

37 **Patient consent:** Not required.  
38

39  
40 **Ethics approval:** Inclusion was based on written consent from participants aged 16 years and  
41 older and from parents for those under 16, in accordance with Norwegian law. The current study  
42 was approved by the Regional Committee for Medical Research Ethics (REK) (2014/1228/REK  
43 Sør-Øst A). The Young-HUNT Studies have been approved by REK and the Data Inspectorate of  
44 Norway.  
45  
46  
47  
48  
49

50  
51 **Data sharing statement:** The data set analysed belongs to a third party, the Nord-Trøndelag  
52 Health Study (HUNT Study). The authors of the current manuscript have been given permission  
53 to analyse the data after obtaining the necessary Norwegian permits. Research groups that wish to  
54 analyse data from the HUNT study may apply to the HUNT organization to get access to the data  
55  
56  
57  
58  
59  
60

1  
2  
3 (<https://www.ntnu.no/hunt/datatilgang>). HUNT databank online provides a complete overview of  
4  
5 the research variables, as well as metadata (<https://hunt-db.medisin.ntnu.no/hunt->  
6  
7 [db/#/survey/YH3](https://hunt-db.medisin.ntnu.no/hunt-db/#/survey/YH3)). The general health questionnaire used in the study is accessible from the  
8  
9 HUNT Bio-And-Databank (<http://www.ntnu.edu/hunt/data/que>).

10  
11  
12 **Provenance and peer review:** Not commissioned; externally peer reviewed.  
13  
14  
15  
16  
17  
18  
19  
20  
21  
22  
23  
24  
25  
26  
27  
28  
29  
30  
31  
32  
33  
34  
35  
36  
37  
38  
39  
40  
41  
42  
43  
44  
45  
46  
47  
48  
49  
50  
51  
52  
53  
54  
55  
56  
57  
58  
59  
60

For peer review only

**Appendix.** Flow chart of the study sample.

**STROBE 2007 (v4) Statement—Checklist of items that should be included in reports of *cross-sectional studies***

| Section/Topic                | Item # | Recommendation                                                                                                                                                                       | Reported on page # |
|------------------------------|--------|--------------------------------------------------------------------------------------------------------------------------------------------------------------------------------------|--------------------|
| <b>Title and abstract</b>    | 1      | (a) Indicate the study's design with a commonly used term in the title or the abstract                                                                                               | 1, 2               |
|                              |        | (b) Provide in the abstract an informative and balanced summary of what was done and what was found                                                                                  | 2                  |
| <b>Introduction</b>          |        |                                                                                                                                                                                      |                    |
| Background/rationale         | 2      | Explain the scientific background and rationale for the investigation being reported                                                                                                 | 4-5                |
| Objectives                   | 3      | State specific objectives, including any prespecified hypotheses                                                                                                                     | 5                  |
| <b>Methods</b>               |        |                                                                                                                                                                                      |                    |
| Study design                 | 4      | Present key elements of study design early in the paper                                                                                                                              | 2, 6               |
| Setting                      | 5      | Describe the setting, locations, and relevant dates, including periods of recruitment, exposure, follow-up, and data collection                                                      | 6                  |
| Participants                 | 6      | (a) Give the eligibility criteria, and the sources and methods of selection of participants                                                                                          | 6                  |
| Variables                    | 7      | Clearly define all outcomes, exposures, predictors, potential confounders, and effect modifiers. Give diagnostic criteria, if applicable                                             | 6-9                |
| Data sources/<br>measurement | 8*     | For each variable of interest, give sources of data and details of methods of assessment (measurement). Describe comparability of assessment methods if there is more than one group | 6-9                |
| Bias                         | 9      | Describe any efforts to address potential sources of bias                                                                                                                            | 8-9                |
| Study size                   | 10     | Explain how the study size was arrived at                                                                                                                                            | 6                  |
| Quantitative variables       | 11     | Explain how quantitative variables were handled in the analyses. If applicable, describe which groupings were chosen and why                                                         | 6-8                |
| Statistical methods          | 12     | (a) Describe all statistical methods, including those used to control for confounding                                                                                                | 9                  |
|                              |        | (b) Describe any methods used to examine subgroups and interactions                                                                                                                  | 9                  |
|                              |        | (c) Explain how missing data were addressed                                                                                                                                          | 10                 |
|                              |        | (d) If applicable, describe analytical methods taking account of sampling strategy                                                                                                   |                    |
|                              |        | (e) Describe any sensitivity analyses                                                                                                                                                |                    |

|                          |     |                                                                                                                                                                                                              |             |
|--------------------------|-----|--------------------------------------------------------------------------------------------------------------------------------------------------------------------------------------------------------------|-------------|
| <b>Results</b>           |     |                                                                                                                                                                                                              |             |
| Participants             | 13* | (a) Report numbers of individuals at each stage of study—eg numbers potentially eligible, examined for eligibility, confirmed eligible, included in the study, completing follow-up, and analysed            | 6, Appendix |
|                          |     | (b) Give reasons for non-participation at each stage                                                                                                                                                         | 6, Appendix |
|                          |     | (c) Consider use of a flow diagram                                                                                                                                                                           | Appendix    |
| Descriptive data         | 14* | (a) Give characteristics of study participants (eg demographic, clinical, social) and information on exposures and potential confounders                                                                     | 11-12       |
|                          |     | (b) Indicate number of participants with missing data for each variable of interest                                                                                                                          | 12          |
| Outcome data             | 15* | Report numbers of outcome events or summary measures                                                                                                                                                         | 13, 15      |
| Main results             | 16  | (a) Give unadjusted estimates and, if applicable, confounder-adjusted estimates and their precision (eg, 95% confidence interval). Make clear which confounders were adjusted for and why they were included | 16-17       |
|                          |     | (b) Report category boundaries when continuous variables were categorized                                                                                                                                    | 16-17       |
|                          |     | (c) If relevant, consider translating estimates of relative risk into absolute risk for a meaningful time period                                                                                             |             |
| Other analyses           | 17  | Report other analyses done—eg analyses of subgroups and interactions, and sensitivity analyses                                                                                                               |             |
| <b>Discussion</b>        |     |                                                                                                                                                                                                              |             |
| Key results              | 18  | Summarise key results with reference to study objectives                                                                                                                                                     | 18          |
| Limitations              | 19  | Discuss limitations of the study, taking into account sources of potential bias or imprecision. Discuss both direction and magnitude of any potential bias                                                   | 18-19       |
| Interpretation           | 20  | Give a cautious overall interpretation of results considering objectives, limitations, multiplicity of analyses, results from similar studies, and other relevant evidence                                   | 20-22       |
| Generalisability         | 21  | Discuss the generalisability (external validity) of the study results                                                                                                                                        | 19          |
| <b>Other information</b> |     |                                                                                                                                                                                                              |             |
| Funding                  | 22  | Give the source of funding and the role of the funders for the present study and, if applicable, for the original study on which the present article is based                                                | 27          |

\*Give information separately for cases and controls in case-control studies and, if applicable, for exposed and unexposed groups in cohort and cross-sectional studies.

**Note:** An Explanation and Elaboration article discusses each checklist item and gives methodological background and published examples of transparent reporting. The STROBE checklist is best used in conjunction with this article (freely available on the Web sites of PLoS Medicine at <http://www.plosmedicine.org/>, Annals of Internal Medicine at <http://www.annals.org/>, and Epidemiology at <http://www.epidem.com/>). Information on the STROBE Initiative is available at [www.strobe-statement.org](http://www.strobe-statement.org).
