# Supplementary figures and images for: Physical activity and sport participation among adolescents: associations with mental health in different age groups. Results from the Young-HUNT study: a cross-sectional survey
Source: PubMed Central journal article supplement — BMJ Open. 2019 Sep 4;9(9):e028555. doi: 10.1136/bmjopen-2018-028555 (PMC6731817; doi:10.1136/bmjopen-2018-028555), 2019-09-04

**Appendix.** Flow chart of the study sample.

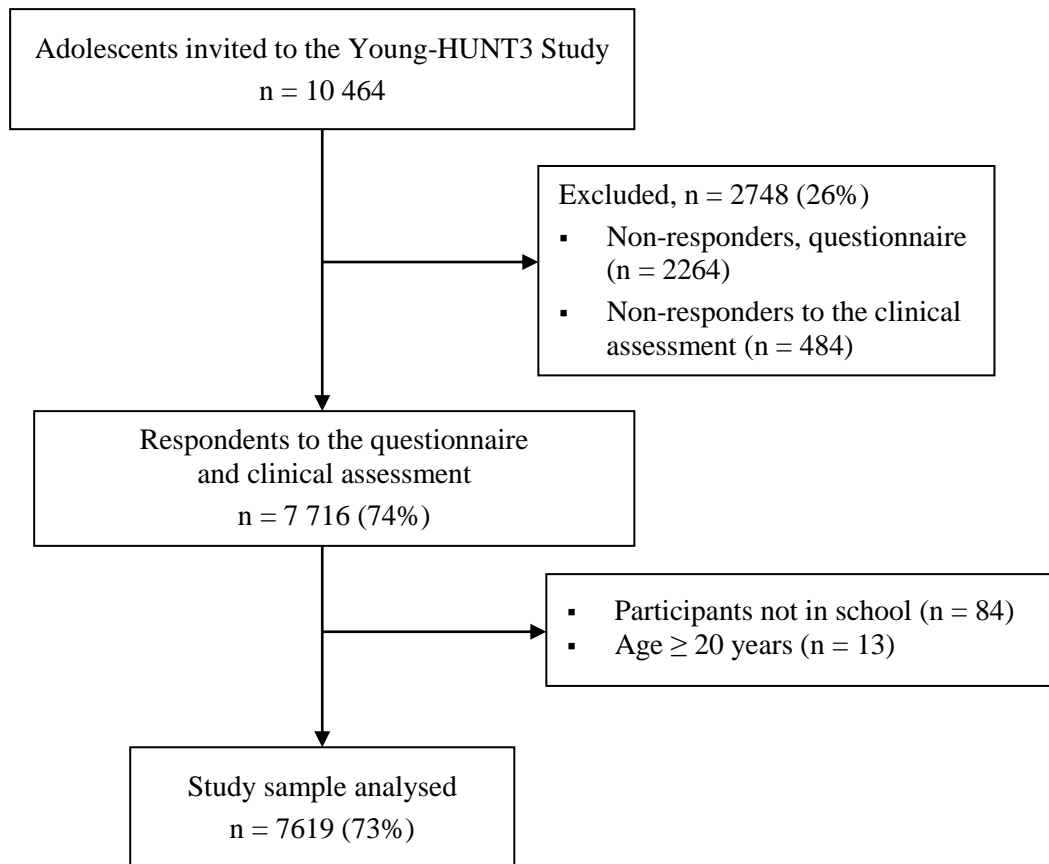

Supplement: bmjopen-2018-028555supp001.pdf [file bmjopen-2018-028555supp001.pdf]
